# Supplementary material for: Axon guidance genes modulate neurotoxicity of ALS-associated UBQLN2
Source: eLife journal article supplement (doi:10.7554/elife.84382), 2023-04-11
Supplement: fig1-figsupp1-data1 [file Figure 1-Figure supplement 1-1 uncropped.pdf › Figure 1-Figure supplement 1 (A,B)/Figure 1-Figure supplement 1-1 uncropped.pdf]

| GMR | RIPA sol |       |       | RIPA insol |       |       |
|-----|----------|-------|-------|------------|-------|-------|
|     | UBQLN2   |       |       | UBQLN2     |       |       |
|     | WT       | P497H | 4XALS | WT         | P497H | 4XALS |

| GMR | RIPA sol |       |       | RIPA insol |       |       |
|-----|----------|-------|-------|------------|-------|-------|
|     | UBQLN2   |       |       | UBQLN2     |       |       |
|     | WT       | P497H | 4XALS | WT         | P497H | 4XALS |

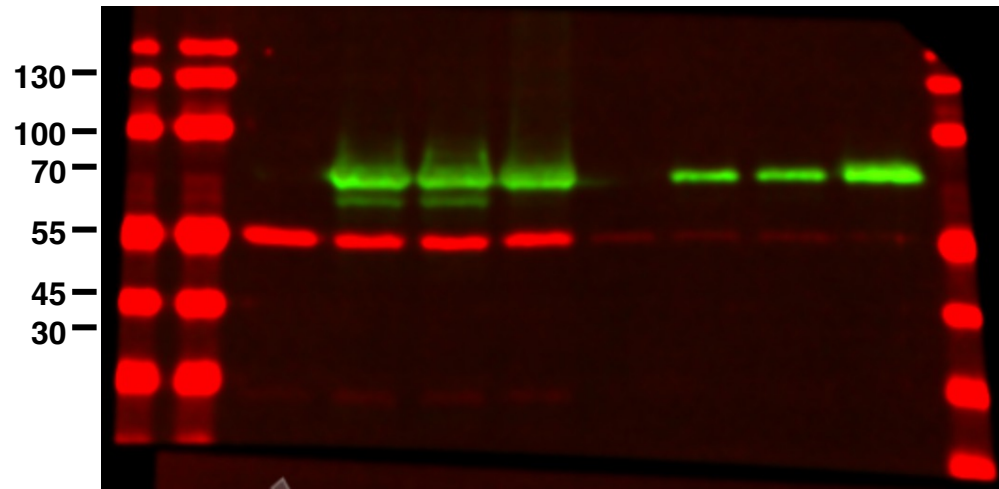

22°C

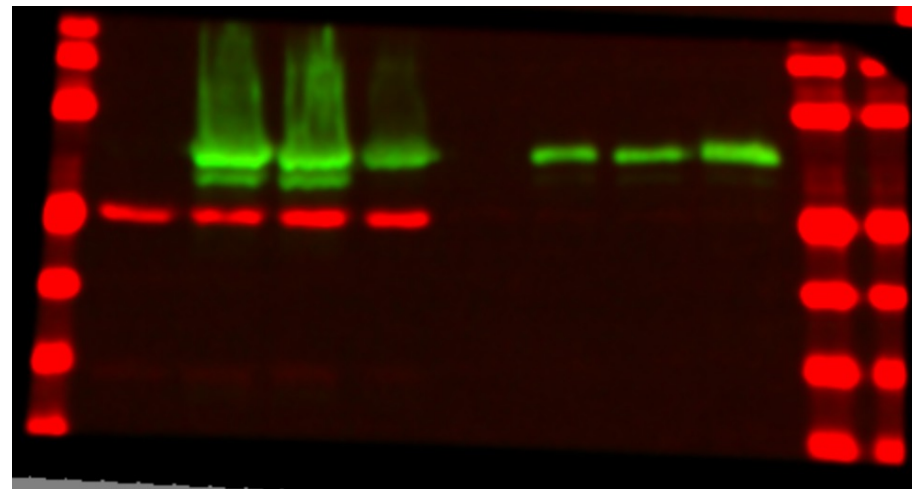

29°C

UBQLN2

β-Tubulin
