# Supplementary material for: Axon guidance genes modulate neurotoxicity of ALS-associated UBQLN2
Source: eLife journal article supplement (doi:10.7554/elife.84382), 2023-04-11
Supplement: fig1-figsupp1-data1 [file Figure 1-Figure supplement 1-densitometry.xlsx]

## Sheet: Sheet1
	22C			29C				22C			29C
Figure 1-Figure supplement 1-3	WT	P497H	4XALS	WT	P497H	4XALS		WT	P497H	4XALS	WT	P497H	4XALS
Insoluble UBQLN2	0.467	0.209	1.17	0.527	0.566	1.51	slide 1	0.239856	0.15493	0.598465	0.252516	0.32417	0.662571
Soluble UBQLN2	1.48	1.14	0.785	1.56	1.18	0.769	slide 2	0.171851	0.298144	0.504348	0.416847	0.363257	0.615169
ratio	0.239856	0.15493	0.598465	0.252516	0.32417	0.662571	slide 3	0.397412	0.500368	0.582677	0.433702	0.469957	0.555556
Insoluble tubulin	0.0947	0.054	0.0887	0.129	0.127	0.201	AVE	0.269706	0.317814	0.56183	0.367688	0.385794	0.611098
Soluble tubulin	1.19	1.21	1.17	1.92	1.61	1.12	STDE	0.0668046	0.100206	0.0291011	0.0577931	0.0435691	0.0309606
ubqln2/tubulin	1.51553	1.06725	1.55319	1.01855	1.00518	1.72521
ratio	1	0.704208	1.02485	0.672073	0.663254	1.13835		22C			29C
	22C			29C				WT	P497H	4XALS	WT	P497H	4XALS
Figure 1-Figure supplement 1-2	WT	P497H	4XALS	WT	P497H	4XALS	slide 1	23.9856	15.493	59.8465	25.2516	32.417	66.2571
Insoluble UBQLN2	4.42	5.14	11.6	7.72	6.96	21.9	slide 2	17.1851	29.8144	50.4348	41.6847	36.3257	61.5169
Soluble UBQLN2	21.3	12.1	11.4	10.8	12.2	13.7	slide 3	39.7412	50.0368	58.2677	43.3702	46.9957	55.5556
ratio	0.171851	0.298144	0.504348	0.416847	0.363257	0.615169	AVE	26.9706	31.7814	56.183	36.7688	38.5794	61.1098
Insoluble tubulin	0.341	0.241	0.367	0.118	0.138	0.172	STDE	6.68046	10.0206	2.91011	5.77931	4.35691	3.09606
Soluble tubulin	1.78	2.04	2.48	2.87	4.73	4.05
ubqln2/tubulin	12.1264	7.55809	8.07868	6.19813	3.93591	8.43202
ratio	1	0.623278	0.666208	0.511128	0.324575	0.695347
	22C			29C
Figure 1-Figure supplement 1-1	WT	P497H	4XALS	WT	P497H	4XALS
Insoluble UBQLN2	6.45	6.8	14.8	6.28	6.57	10.7
Soluble UBQLN2	9.78	6.79	10.6	8.2	7.41	8.56
ratio	0.397412	0.500368	0.582677	0.433702	0.469957	0.555556
Insoluble tubulin	0.191	0.206	0.131	0.0529	0.0577	0.0282
Soluble tubulin	1.94	2	1.79	1.79	2.36	1.88
ubqln2/tubulin	7.61614	6.16047	13.2223	7.85718	5.78236	10.0933
ratio	1	0.80887	1.73609	1.03165	0.759224	1.32525
