# Supplementary material for: Axon guidance genes modulate neurotoxicity of ALS-associated UBQLN2
Source: eLife journal article supplement (doi:10.7554/elife.84382), 2023-04-11
Supplement: fig1-figsupp1-data1 [file Figure1-Figure supplement 1 (C) MS-PMS.xlsx]

## Sheet: Sheet1
	dUbqln			hUBQLN2WT					dUbqln			hUBQLN24XALS
22°C	3	6	9	28	34	27		22°C	4	5	7	29	18	18
29°C	11	11	16	49	52	97		29°C	11	19	20	87	29	35
