# Supplementary material for: Axon guidance genes modulate neurotoxicity of ALS-associated UBQLN2
Source: eLife journal article supplement (doi:10.7554/elife.84382), 2023-04-11
Supplement: fig2-figsupp1-data1 [file Figure 2-Figure supplement 1 (D,E)-Densitometry.xlsx]

## Sheet: Sheet1
		shLuci			shRab5
		WT	P497H	4XALS	WT	P497H	4XALS
	UBQLN2	7.07	6.37	5.93	7.48	8.14	8.61
	Tubulin	2.89	2.94	3.23	2.89	3.13	3.31
	ratio	2.44637	2.16667	1.83591	2.58824	2.60064	2.60121
	ratio	1	0.885667	0.750465	1.05799	1.06306	1.06329
		shLuci			shRab5
		WT	P497H	4XALS	WT	P497H	4XALS
	UBQLN2	5.94	6.22	6.75	5.29	5.56	6.67
	Tubulin	2.91	2.84	2.74	2.31	2.67	2.46
	ratio	2.04124	2.19014	2.4635	2.29004	2.0824	2.71138
	ratio	1	1.07295	1.20687	1.12189	1.02016	1.3283
		shLuci			shRab5
		WT	P497H	4XALS	WT	P497H	4XALS
	UBQLN2	2.97	2.53	2.84	2.38	2.3	3.11
	Tubulin	2.63	2.49	2.45	1.93	2.82	3.02
	ratio	1.12928	1.01606	1.15918	1.23316	0.815603	1.0298
	ratio	1	0.899747	1.02648	1.09199	0.722234	0.911912
	shLuci			shRab5
	WT	P497H	4XALS	WT	P497H	4XALS
	1	0.885667	0.750465	1.05799	1.06306	1.06329
	1	1.07295	1.20687	1.12189	1.02016	1.3283
	1	0.899747	1.02648	1.09199	0.722234	0.911912
AVE	1	0.952787	0.994605	1.09062	0.935153	1.10117
STDE	0	0.0602193	0.132717	0.0184591	0.107181	0.121688
