# Supplementary material for: Axon guidance genes modulate neurotoxicity of ALS-associated UBQLN2
Source: eLife journal article supplement (doi:10.7554/elife.84382), 2023-04-11
Supplement: fig2-figsupp1-data1 [file Figure 2-Figure supplement 1 (G,H)-densitometry.xlsx]

## Sheet: Sheet1
2	GFP			GFP-Rab5
	WT	P497H	4XALS	WT	P497H	4XALS
UBQLN2	5.78	5.25	5.12	6.57	6.72	6.79
Tubulin	3.32	3.01	3.17	3.13	3.24	3.72
ratio	1.74096	1.74419	1.61514	2.09904	2.07407	1.82527
ratio	1	1.00185	0.927729	1.20568	1.19134	1.04842
3	GFP			GFP-Rab5
	WT	P497H	4XALS	WT	P497H	4XALS
UBQLN2	6.69	6.56	6.67	7.48	6.22	6.13
Tubulin	2.63	2.92	2.86	3.19	3.34	2.33
ratio	2.54373	2.24658	2.33217	2.34483	1.86228	2.6309
ratio	1	0.883183	0.916831	0.921808	0.732105	1.03427
1	GFP			GFP-Rab5
	WT	P497H	4XALS	WT	P497H	4XALS
UBQLN2	7.01	4.87	9.13	6.52	5.82	8.23
Tubulin	3.52	2.69	3.89	2.34	3.42	3.01
ratio	1.99148	1.81041	2.34704	2.78632	1.70175	2.73422
ratio	1	0.909078	1.17854	1.39912	0.854519	1.37296
	GFP			GFP-Rab5
	WT	P497H	4XALS	WT	P497H	4XALS
	1	1.00185	0.927729	1.20568	1.19134	1.04842
	1	0.883183	0.916831	0.921808	0.732105	1.03427
	1	0.909078	1.17854	1.39912	0.854519	1.37296
AVE	1	0.931371	1.0077	1.17554	0.925987	1.15189
STDE	0	0.0360253	0.0854818	0.138615	0.137304	0.110616
