# Supplementary material for: Axon guidance genes modulate neurotoxicity of ALS-associated UBQLN2
Source: eLife journal article supplement (doi:10.7554/elife.84382), 2023-04-11
Supplement: fig2-figsupp2-data1 [file Figure 2-Figure supplement 2 (C)-densitometry.xlsx]

## Sheet: Sheet1
1	4XALS
	lilli17-2	cyo
UBQLN2	13.9	12.2
Tubulin	4.2	4.16
ratio	3.30952	2.93269
ratio	1.12849	1
2	4XALS
	lilli17-2	cyo
UBQLN2	11.8	11.8
Tubulin	4.08	3.93
ratio	2.89216	3.00254
ratio	0.963235	1
3	4XALS
	lilli17-2	cyo
UBQLN2	10.4	9.85
Tubulin	4.49	4.52
ratio	2.31626	2.1792
ratio	1.06289	1
	4XALS
	lilli17-2	cyo
	1.12849	1
	0.963235	1
	1.06289	1
AVE	1.05154	1
STDE	0.0480438	0
