# Supplementary material for: Axon guidance genes modulate neurotoxicity of ALS-associated UBQLN2
Source: eLife journal article supplement (doi:10.7554/elife.84382), 2023-04-11

**GMR>UBQLN2<sup>4XALS</sup>/**

**GMR>UBQLN2<sup>4XALS</sup>/**

**GMR>UBQLN2<sup>4XALS</sup>/**

*lilli*<sup>17-2</sup>

CyO

*lilli*<sup>17-2</sup>

CyO

*lilli*<sup>17-2</sup>

CyO

130 —

100 —

70 —

55 —

45 —

30 —

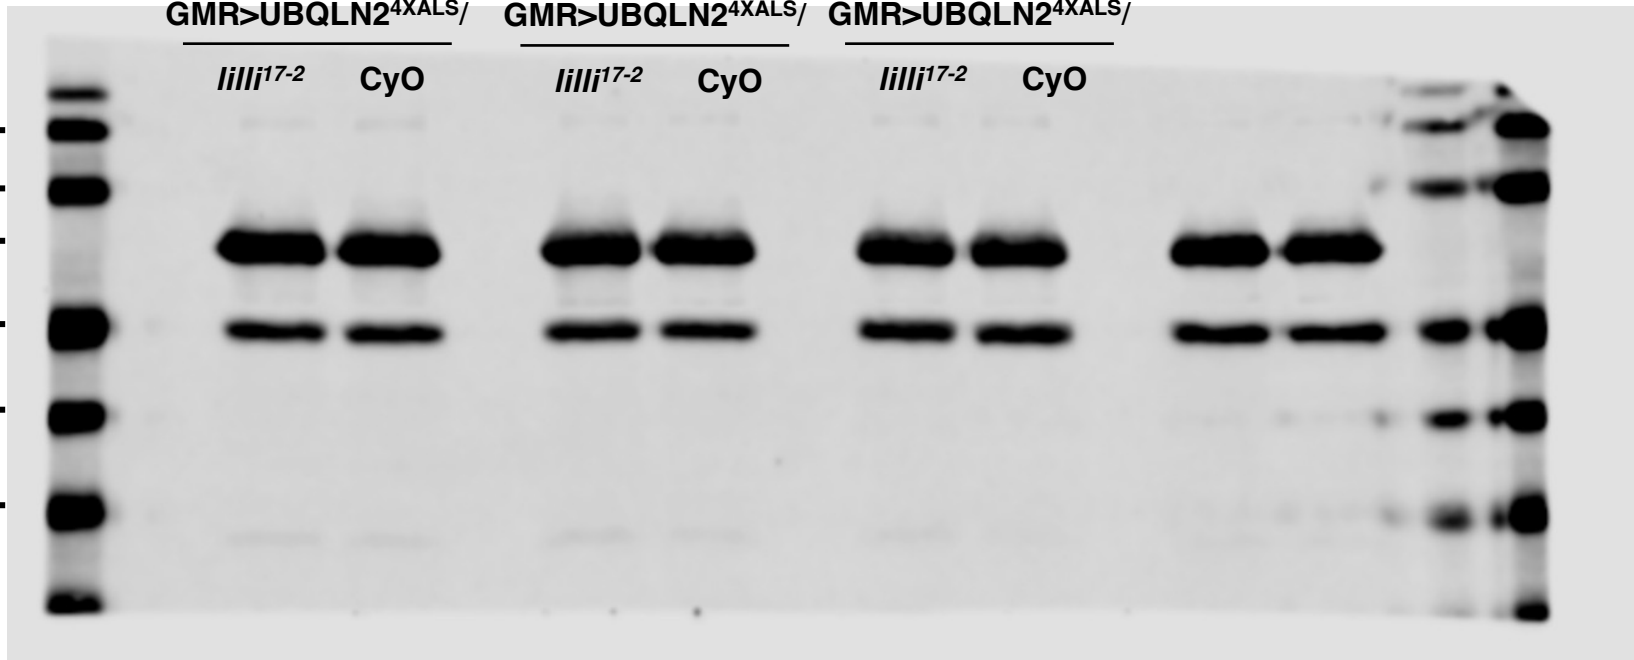

Supplement: fig2-figsupp2-data1 [file Figure 2-Figure supplement 2 (C)-uncropped.pdf › Figure 2-Figure supplement 2 source data/Figure 2-Figure supplement 2 (C)-uncropped.pdf]
