# Supplementary material for: Axon guidance genes modulate neurotoxicity of ALS-associated UBQLN2
Source: eLife journal article supplement (doi:10.7554/elife.84382), 2023-04-11
Supplement: fig3-data1 [file Figure 3 (D,E)-Densitometry.xlsx]

## Sheet: Sheet1
1	4XALS
	ED2426	cyo	BSC346	cyo	cyo	Unc5~3	shLuci	shUnc5
UBQLN2	1.59	1.26	1.51	1.27	1.54	1.55	1.9	2.48
Tubulin	2.45	2.15	2.34	2.58	2.59	1.84	2.01	2.94
ratio	0.64898	0.586047	0.645299	0.492248	0.594595	0.842391	0.945274	0.843537
ratio	1	0.903028	0.994329	0.758495	0.916199	1.29802	1.45655	1.29979
2	4XALS
	ED2426	cyo	BSC346	cyo	cyo	Unc5~3	shLuci	shUnc5
UBQLN2	11.3	10.2	10.3	7.59	7.47	7.45	7.81	7.32
Tubulin	4.34	4.2	3.35	3.55	3.52	3.27	3.75	3.45
ratio	2.60369	2.42857	3.07463	2.13803	2.12216	2.27829	2.08267	2.12174
ratio	1	0.932743	1.18087	0.821154	0.815059	0.875024	0.799891	0.814898
3	4XALS
	ED2426	cyo	BSC346	cyo	cyo	Unc5~3	shLuci	shUnc5
UBQLN2	8.45	8.59	7.65	6.45	7.39	7.01	7.67	7.47
Tubulin	3.77	3.89	3.87	3.31	4.38	3.2	4.8	3.63
ratio	2.24138	2.20823	1.97674	1.94864	1.68721	2.19062	1.59792	2.05785
ratio	1	0.985209	0.881932	0.869393	0.752757	0.977356	0.712917	0.918118
	4XALS
	ED2426	cyo	BSC346	cyo	cyo	Unc5~3	shLuci	shUnc5
	1	0.903028	0.994329	0.758495	0.916199	1.29802	1.45655	1.29979
	1	0.932743	1.18087	0.821154	0.815059	0.875024	0.799891	0.814898
	1	0.985209	0.881932	0.869393	0.752757	0.977356	0.712917	0.918118
AVE	1	0.940327	1.01905	0.816348	0.828005	1.05013	0.989787	1.01094
STDE	0	0.0240254	0.0871802	0.0321045	0.047625	0.12742	0.234737	0.147473
					0.216755
