# Supplementary material for: Axon guidance genes modulate neurotoxicity of ALS-associated UBQLN2
Source: eLife journal article supplement (doi:10.7554/elife.84382), 2023-04-11
Supplement: fig4-data1 [file Copy of P4X and Unc5 data.xlsx]

## Sheet: Sheet1
D42> UBQLN2 4xALS x shLuci
Bouton #	Mature boutons	Satallite boutons	Boutons Area (um2)	Total boutons	bouton/square area	Mature/square area		D42> UBQLN2 4xALS x shUnc5
5010	7	6	322.037	13	0.040368	0.0217366		Bouton #	Mature boutons	Satallite boutons	Boutons Area (um2)	Total boutons	bouton/square area		Mature boutons
5011	8	3	230.799	11	0.0476605	0.0346622		5034	8	1	188.57	9	0.0477276		0.0424246
5012	7	5	291.653	12	0.0411448	0.0240011		5035	8	0	200.586	8	0.0398831		0.0398831
5013	8	7	344.868	15	0.0434949	0.0231973		5036	7	1	256.591	8	0.031178		0.0272808
5014	10	2	300.217	12	0.0399711	0.0333092		5037	9	1	359.931	10	0.0277831		0.0250048
5022	11	6	327.101	17	0.0519717	0.0336288		5038	9	3	299.163	12	0.0401119		0.0300839
5023	9	0	399.928	9	0.0225041	0.0225041		5039	7	3	436.921	10	0.0228874		0.0160212
5024	7	3	274.701	10	0.0364032	0.0254823		5040	5	3	196.381	8	0.0407371		0.0254607
5025	7	1	200.372	8	0.0399257	0.034935		5041	9	2	246.034	11	0.0447093		0.0365803
5026	8	4	346.928	12	0.0345893	0.0230595		5046	10	1	339.074	11	0.0324413		0.0294921
5027	10	2	321.307	12	0.0373475	0.0311229		5047	15	0	309.806	15	0.0484174		0.0484174
5028	6	5	305.042	11	0.0360606	0.0196694		5048	8	7	270.71	15	0.0554098		0.0295519
5030	5	1	226.035	6	0.0265446	0.0221205		5049	9	1	325.556	10	0.0307167		0.027645
5031	6	4	319.627	10	0.0312865	0.0187719		5050	9	1	302.253	10	0.0330849		0.0297764
5032	8	8	310.469	16	0.0515349	0.0257675		5051	9	1	322.981	10	0.0309616		0.0278654
5033	7	2	273.761	9	0.0328754	0.0255697		5052	8	2	241.313	10	0.04144		0.033152
5029	7	7	333.705	14	0.0419532	0.0209766		5053	8	5	220.842	13	0.0588656		0.036225
								5054	8	5	267.706	13	0.0485607		0.0298835
								5055	7	1	198.784	8	0.0402447		0.0352141
								5056	9	4	335.426	13	0.0387567		0.0268316
D42> w1118
	Mature boutons	Satallite boutons	Boutons Area (um2)	Total boutons	bouton/square area	Mature/Square area
	7	1	253.14	8	0.0316031	0.0276527
	8	0	256.925	8	0.0311375	0.0311375
	6	2	207.216	8	0.0386071	0.0289553
	5	0	188.964	5	0.0264601	0.0264601
	7	0	270.276	7	0.0258995	0.0258995
	9	0	355.822	9	0.0252935	0.0252935
	8	2	257.574	10	0.0388238	0.031059
	5	1	147.02	6	0.0408108	0.034009
	6	1	213.72	7	0.0327531	0.0280741
	7	1	189.685	8	0.0421752	0.0369033
	7	2	249.304	9	0.0361005	0.0280782
	6	0	210.549	6	0.0284969	0.0284969
	8	2	244.71	10	0.0408647	0.0326918
	8	1	260.691	9	0.0345236	0.0306877
	7	0	292.942	7	0.0238955	0.0238955
	7	3	192.82	10	0.0518618	0.0363033
	5	2	170.875	7	0.0409656	0.0292612
	9	0	220.693	9	0.0407806	0.0407806
	5	0	144.758	5	0.0345404	0.0345404
