# Supplementary material for: Axon guidance genes modulate neurotoxicity of ALS-associated UBQLN2
Source: eLife journal article supplement (doi:10.7554/elife.84382), 2023-04-11
Supplement: fig4-data1 [file Figure 4A source data.xlsx]

## Sheet: D42_4XALS_ Female
D42-gal				D42-4XALS
sh-luci	sh-mCherry	sh-Unc5 (TRiP)	sh-Unc5 (kk)	sh-luci	sh-mCherry	sh-Unc5 (TRiP)	sh-Unc5 (kk)
13.7083	14.688	13.8504	11.6068	10.5374	9.96154	13.7009	11.547
10.8066	14.6282	11.547	7.02991	9.9391	8.67521	13.641	10.7692
10.5972	14.5983	10.6795	6.73077	9.5203	7.05983	13.2222	9.39316
9.19124	11.0385	8.70513	5.17521	9.43056	1.49573	11.7564	7.17949
7.51603	9.63248	8.01709	4.96581	8.47329	1.49573	11.4573	7.17949
4.01603	3.76175	4.15812	4.15812	6.88782	0.478632	10.141	4.00855
3.38782	14.3955	4.00855	2.60256	6.31944	0.448718	8.01709	2.96154
0.00747863	14.3657	3.19338	2.57265	5.96047	0.179487	6.52137	2.75214
0	5.3209	11.2239	1.61538	3.83654	0	4.57692	2.69231
10.4478	3.26119	10.3582	0.478632	2.37073	11.9776	4.30769	1.31624
8.59701	2.27612	9.58209	0.261752	1.35363	10.8731	2.09402	0.688034
7.67164	0.119403	7.40299	0.209402	0.456197	10.6045	0.867521	0.32906
4.92537	13.2099	6.77612	0.179487	0.0598291	9.79851	0.717949	0.269231
1.40299	12.167	5.37313	11.6716	0	9.05224	0.65812	0.209402
0.179104	12.1038	5.01493	10.3881	14.5672	8.78358	0.269231	0.082265
0	11.5034	4.56716	9.31343	11.4627	7.23134	0.119658	12.8134
0	10.3025	0.410448	9.07463	10.0896	6.93284	0.082265	12.0373
14.3555	10.3025	12.4199	6.1791	9.85075	6.51493	0.0598291	11.4701
13.3442	9.82844	9.3544	5.37313	9.85075	1.47015	13.4701	9.17164
13.2494	9.73363	8.91196	4.47761	7.91045	0	10.3955	8.30597
12.6806	9.386	6.13093	1.37313	6.1791	0	9.26119	7.11194
12.5858	2.3702	5.49887	1.25373	4.71642	14.6637	9.26119	6.84328
11.5745	12.6538	4.89842	0.865672	4.47761	14.5688	8.18657	4.54478
11.1005	12.5	3.38149	0.626866	3.49254	14.5056	7.20149	4.33582
10.816	11.7615	2.40181	0.507463	2.65672	13.7788	6.60448	3.88806
8.66704	10.9923	1.193	0.268657	2.02985	13.6208	5.73881	3.17164
8.31941	9.42308	9.75385	0.231343	1.97015	4.80361	4.51493	1.82836
5.91761	9.02308	9.38462	0.149254	0.38806	0.46614	3.3209	1.14179
5.56998	7.85385	8.58462	0.149254	0	0.0316027	2.78358	0.813433
4.90632	0.584615	7.01538	12.5226	0	8.06154	2.30597	0.507463
1.55643	0.438462	6.92308	8.03499	13.9368	6.30769	0.69403	13.5892
1.54853	0	6.4	7.15011	13.1783	4.21538	0.425373	13.4944
13.8846	13.9148	4.24615	4.81151	12.8623	3.84615	0.425373	10.0181
12.9615	13.7909	4.03077	4.05305	11.0926	2.86154	0.30597	9.67043
12.9	13.4192	2.36923	3.5474	10.7449	1.78462	0.0298507	9.63883
12.2538	11.8086	2.36923	3.19977	9.60722	0.892308	0	8.81716
11.8846	10.9104	1.16154	2.44131	9.00677	0.8	0	8.1219
10.7462	10.6626	0.676923	1.61964	8.62754	0.738462	13.7472	6.69977
10.1923	9.36173	9.76438	0.70316	7.52144	0.738462	13.3995	5.62528
9.88462	0.278761	8.3396	0.70316	7.17381	0.615385	12.9887	0.410835
8.34615	12.6846	6.57412	0.481941	6.16253	0.584615	12.8939	0.221219
1.82308	11.4004	6.01659	0.00790068	5.08804	0.523077	11.1242	0.221219
1.48462	9.95973	4.80863	0	5.05643	0.461538	10.8397	0.0948081
0.184615	9.89709	3.19801	11.2692	4.06885	0.330769	7.20542	0.023702
13.9458	9.83445	2.42367	10.5923	8.49231	0.307692	6.00451	8.06154
13.0476	7.73602	2.36173	9.7	8.33846	0.307692	3.95034	8.03077
11.9325	5.88814	1.24668	9.63846	7.6	0.215385	3.95034	7.38462
10.4768	5.44966	0.658186	8.83846	6.64615	0	3.31828	6.95385
10.198	1.7226	0.441372	7.73077	6.21538	6.90708	0.410835	6.21538
7.81305	0	0.0929203	7.08462	5.90769	6.16372	0.410835	5.29231
5.64491	14.1538	11.9094	6.40769	5.29231	4.4292	0.410835	3.6
5.55199	12.6462	7.02349	1.36154	3.93846	3.40708	0.276524	3.23077
4.74668	11.2615	5.73937	0.469231	3.23077	3.0354	0.252822	2.73846
2.95022	10.9231	4.9877	0.246154	0.707692	2.5708	13.7	2.18462
1.8042	10.5846	4.32998	11.3673	0.553846	1.45575	11.7615	1.90769
1.77323	10.2769	4.0481	10.7168	0.523077	0.929204	11.3923	0.584615
0.627212	8.49231	2.13758	9.75664	0	0.681416	11.2692	0.523077
0	7.2	0.477629	9.07522	0.369231	0.650442	11.0846	0.307692
12.7159	6.36923	0.477629	8.48673	0.276923	0.619469	10.7154	0.246154
10.7114	5.26154	0.16443	7	0.276923	0.557522	10.2538	0.184615
9.39597	0.638462	0.0313199	5.29646	0.246154	0.495575	10.1308	0.146154
8.83221	0.246154	8.37692	0.0232301	0.123077	0.340708	10.0692	0
8.45638	0.184615	7.54615	13.9374	0.0538462	0.309735	10.0692	11.7389
7.14094	0.153846	5.57692	10.3669	0.0307692	0.309735	9.85385	7.99115
6.73378	12.7105	1.85385	10.085	10.6239	0.271018	9.11538	7.12389
5.73154	11.5439	1.20769	7.5481	8.88938	11.189	9.02308	6.81416
4.57271	9.79386	0.746154	5.9821	7.83628	11.189	8.16154	5.32743
1.15884	9.02632	0.5	5.85682	6.62832	8.87136	8.00769	5.14159
0.782998	6.75439	0.5	4.79195	4.92478	7.96309	5.02308	4.70796
0	4.97368	0.492308	3.69575	4.27434	5.42617	4.00769	4.24336
0	3.62281	0.284615	1.87136	3.80973	4.5179	2.9	4.24336
12.5846	3.28509	0.0692308	0.689038	3.15929	4.26734	0.684615	3.15929
10.8923	1.10526	11.2061	11.6077	2.23009	3.5783	0.653846	3.15929
10.6769	0.0921053	9.64035	10.2231	1.45575	2.23154	0.123077	3.0354
9.87692	0.0921053	8.59649	8.31538	1.20796	1.54251	12.521	2.16814
8.52308	12.777	7.98246	4.62308	0.712389	0.540268	10.198	1.33186
7.81538	10.3632	5.89474	2.71538	0.650442	0.508949	8.30863	0.371681
6.95385	10.0736	5.34211	1.11538	0.650442	0.508949	7.75111	0.209071
1.07692	9.36552	0.921053	0.961538	0.650442	0.477629	7.10066	0.185841
1.04615	8.81839	0.368421	0.776923	0.557522	0.446309	6.9458	0.123894
0.607692	7.4023	0.307018	0	0	0.446309	5.33518	8.11969
15.0132	6.88736	0.153509	14.5526	0	0.0704698	5.21128	7.74385
11.8202	5.66437	0	13.1096	0	0.0626398	5.21128	7.24273
9.45614	5.05287	12.9057	10.3465	11.2517	0.00782998	4.77765	6.17785
8.56579	4.63448	12.0046	8.13596	9.717	0.00782998	4.375	5.33221
4.29825	3.54023	6.72644	7.36842	6.33445	0	2.3927	5.30089
2.88596	0.7	6.14713	3.89912	5.01902	6.89231	1.9281	4.76846
2.72478	13.2063	3.21839	3.5614	2.85794	5.96923	1.86615	4.70582
1.13596	12.6032	3.05747	3.40789	0.477629	5.87692	0.309735	1.69911
0.429825	11.5873	1.77011	2.60965	0.477629	5.04615	0.286504	0.822148
0.337719	10.6032	1.77011	0.153509	0.477629	3.93846	13.6946	0.728188
13.646	9.65079	0.675862	0	0.289709	0.984615	12.9116	0.634228
11.7471	9.1746	0.514943	0	0.227069	0.707692	11.3143	0.571588
11.4897	7.90476	0.514943	13.7103	0.227069	0.646154	11.1264	0.383669
10.8782	7.39683	0.12069	10.6529	0.227069	0.646154	9.96756	0.352349
7.85287	6.19048	12.8571	8.72184	0	0.615385	9.52908	0.250559
6.17931	4.44444	12.6667	6.37241	0	0.615385	9.21588	0.13311
4.6023	3.20635	11.5873	3.47586	0	0.553846	9.18456	0
2.38161	3.1746	9.68254	2.86437	0	0.492308	8.87136	9.13846
0.474713	3.14286	8.60317	2.6069	0	0.369231	8.71477	8.43077
0.386207	0.150794	8.28571	1.44828	10.2154	0.276923	7.83781	6.30769
13.9127	11.276	7.52381	1.28736	9.13846	0.269231	7.33669	6.12308
12.7063	10.7376	7.42857	0.152874	6.33846	0.184615	7.21141	5.29231
12.1032	10.4842	6.4127	13.881	4.89231	0.153846	5.48881	5.26154
11.6905	8.80543	5.71429	12.1032	4.43077	0.0307692	4.29866	4.27692
10.6429	7.88688	3.99206	10.7698	3.53846	10.1316	2.9519	2.98462
10.4206	7.72851	13.2794	10.2619	3.10769	9.76316	0.258389	2.30769
4.89683	7.60181	8.90837	9.43651	2.24615	7.73684	0.10179	2.15385
3.69048	7.22172	8.90837	7.81746	2.03077	6.75439	0.0626398	2
0.261905	6.39819	7.6414	6.16667	1.72308	6.75439	12.7077	2
0	4.46606	6.84955	6.16667	0.707692	3.10088	12.4	0.615385
12.1312	3.61086	6.84955	5.43651	0.523077	2.79386	10.9538	0.338462
11.4344	0	6.46946	4.61111	0.492308	0.70614	10.9538	0.238462
10.009	13.5934	6.18439	4.19841	0.461538	0.70614	10.0923	0.123077
9.12217	11.1059	4.50566	3.43651	0.276923	0.70614	10	0.0615385
8.17195	9.35194	3.8009	0.388889	0	0.644737	9.63077	10.17
7.76018	7.85308	12.7244	0.222222	0	0.429825	9.53846	8.05154
7.47511	7.27904	10.3645	0.103175	0	0.399123	8.49231	8.02083
3.38914	6.86446	9.8861	8.78167	14.2763	0.337719	8.30769	6.02522
2.20928	5.74829	9.43964	8.59163	13.5088	0.276316	8.27692	5.7182
14.1913	5.7164	9.05695	7.67308	13.2939	0.176535	7.96923	4.42873
10.7472	5.39749	4.30524	7.54638	6.35526	0.122807	7.23077	4.42873
9.28018	3.13326	3.22096	6.69118	6.07895	0.0614035	5.90769	4.42873
7.65376	1.79385	1.23576	6.40611	5.2807	8.66552	4.18462	3.32346
6.88838	0.510251	0.350797	6.15271	4.08333	8.56897	4.15385	2.55592
6.31435	12.2818	0.318907	4.44231	3.96053	6.76667	4.09231	2.27961
5.93166	11.6455	12.9898	4.37896	2.73246	5.51149	2.03077	1.29715
4.29727	11.2318	10.3489	3.65045	0.614035	3.99885	0.523077	0.683114
13.308	10.2455	10.1898	3.52376	0.429825	2.51839	0.523077	0.161184
8.63068	10.1182	9.3625	2.51018	0.307018	2.13218	0.307692	0.161184
7.67614	8.43182	9.20341	0.704751	0.122807	1.61724	0.115385	0.0307017
7.51705	7.85909	7.48523	0.696833	0	1.2954	0	13.1954
7.35795	6.36364	5.92614	13.713	0	0.555172	13.6393	11.6828
4.23977	5.79091	4.87614	11.959	0	0.555172	12.6875	9.14023
4.20795	3.94545	3.0625	9.82232	0	0.490805	8.48136	8.91494
2.10795	2.22727	0	7.68565	12.5195	0.329885	8.11294	8.78621
1.47159	0.35	11.4286	7.07973	11.4253	0.265517	8.11294	8.78621
0.835227	0.246591	10.3492	6.41002	10.0414	0.201149	7.16118	7.11264
0.668182	14.254	8.06349	5.86788	6.46897	0.136782	6.73136	6.75862
0.421591	12.7937	7.74603	5.83599	5.56782	0.104598	6.39364	6.72644
11.5873	11.0159	7.42857	4.49658	5.56782	0	4.67434	5.14943
8.7619	11.0159	6.12698	4.14579	5.11724	12.3492	4.64364	4.82759
7.87302	9.77778	6.03175	4.082	3.70115	12.254	0.621711	3.63678
7.46032	9.26984	3.2381	0.446469	2.28506	12.0952	0.591009	3.02529
5.42857	8.85714	3.01587	0	0.675862	11.3016	0.4375	2.8
4.69841	8.38095	2.84921	12.6955	0.643678	11.2063	0.314693	2.38161
3.74603	7.55556	0.15873	11.7091	0.611494	9.93651	0.191886	1.38391
2.40476	6.8254	10.6834	10.6273	0.450575	9.26984	0.0383772	0.708046
14.0399	6.7619	10.205	9.51364	0.386207	8.34921	0.0307017	0.289655
12.1264	4	8.22779	8.59091	0.289655	8.31746	12.2621	0.249425
11.6481	2.34127	7.11162	8.59091	0.225287	7.84127	10.7494	0.128736
10.1811	13.9681	6.8246	8.14545	0	7.80952	9.97701	14
7.37472	12.9157	6.44191	8.08182	0	7.26984	9.23678	13.0476
5.20615	12.0866	6.31435	5.31364	13.1746	6.53968	8.97931	12.6349
5.20615	11.8952	5.58087	3.56364	12.5714	2.09524	8.94713	10.3175
3.48405	10.8428	5.26196	0.763636	12.5397	0.436508	8.72184	9.74603
3.48405	10.4601	4.1139	0.636364	10.2857	13.6199	8.72184	9.33333
2.14465	10.4282	1.52278	0.381818	10.0952	12.9231	8.33563	9.07937
0.0318907	10.0456	14.0396	0.310227	7.52381	11.8462	8.30345	8.28571
14.3484	7.5262	12.4876	12.8889	6.8254	11.276	8.07816	7.30159
13.4299	7.27107	12.3292	11.8095	6.8254	10.7692	7.49885	7.01587
10.8009	6.95216	11.8224	10.8889	6.57143	10.0407	6.01839	6.12698
9.66063	6.79271	9.57353	8.92063	6.46825	8.14027	5.85747	5.87302
9.37557	5.1344	8.40158	7.96825	0	7.88688	5.47126	4.79365
9.24887	4.13781	6.9129	5.65079	11.4106	7.8552	2.96092	3.68254
9.02715	10.5238	4.60068	5.52381	11.2839	7.76018	2.25287	0.81746
8.60747	9.38348	4.22059	4.85714	10.017	7.41176	1.44828	11.6561
7.8552	9.06674	4.0543	4.7619	9.79525	6.96833	0.0241379	11.6244
0.506787	8.05317	1.36991	4.38095	8.02149	6.93665	12.4762	11.371
0.443439	6.97624	13.5901	3.46032	7.98982	6.23982	12.2222	10.8959
0	6.72285	8.63964	3.20635	7.13462	1.10068	11.3968	10.2308
14.2523	5.45588	8.13514	0.690476	4.79072	0.38009	10.1905	8.71041
13.6532	4.50566	7.91441	0.222222	3.39706	11.2893	9.30159	7.22172
12.7387	4.33937	7.03153	13.9362	3.00905	10.8428	9.07937	6.77828
11.1622	0.419683	4.38288	13.8087	0	10.5558	8.53968	6.39819
10.4685	11.8559	4.19369	9.75854	14.0399	10.5239	7.61905	5.51131
9.3964	10.1847	4.0991	7.94077	13.5615	10.492	7.36508	5.25792
7.75676	9.36486	3.94144	6.95216	13.4339	9.82232	6.22222	4.78281
7.09459	8.38739	2.3964	6.76082	13.0513	9.34396	6.15873	4.14932
5.8964	6.68468	1.78941	6.21868	12.9875	9.24829	5.68254	3.48416
5.26577	5.48649	11.0409	6.21868	12.3178	9.18451	0.912698	3.00113
3.18468	3.31081	9.45	5.16629	11.3929	7.71754	12.9548	13.6253
2.58559	2.64077	7.47727	3.15718	9.92597	5.89977	12.3529	10.5957
2.19932	12.8227	7.19091	1.53075	9.00114	5.83599	12.0045	9.79841
0.630631	12.5682	6.93636	0.765376	8.65034	4.05011	10.7059	8.55467
0.0315315	11.5182	5.18636	0.287016	5.83599	3.30866	8.55204	8.39522
14.4455	9.00455	4.80455	0.151481	5.55695	12.8307	8.29864	8.17198
11.6136	8.84545	4.61364	12.0995	0	12.0989	7.88688	8.1082
9.06818	7.41364	2.89545	10.4208	0	12.0352	7.34842	7.15148
8.84545	5.50455	1.93295	8.55204	13.7216	9.77614	7.25339	6.67312
8.43182	3.61932	14.0905	8.29864	13.308	8.88523	6.93665	5.90774
8.11364	14.1113	8.63519	7.72851	10.3807	8.63068	0.973982	5.74829
7.76364	10.7157	7.68887	6.8733	9.87159	8.47159	13.9043	5.01481
7.76364	10.1312	6.35288	6.58824	9.55341	7.70795	12.1503	4.31321
5.66364	9.37972	5.32306	6.58824	8.21705	7.45341	10.3964	3.47608
4.35909	8.71173	4.57157	5.98643	6.40341	5.57614	8.83371	1.09226
3.05455	7.84891	4.34891	4.94118	6.24432	4.43068	8.45103	10.85
2.45	7.34791	3.87575	4.59276	3.18977	3.62727	7.97267	8.75
2.00455	6.84692	3.82008	4.27602	1.17727	13.0476	7.62187	8.71818
0.763636	5.9006	3.40258	2.3043	0.453409	11.873	7.03986	7.38182
0.723864	5.9006	1.47515	0.538462	0	11.2381	7.01595	6.04545
13.3877	2.92247	13.8056	0	0	11.1111	6.66515	5.69545
11.5229	2.83897	8.33333	10.7523	0	10.2222	11.6216	5.53636
10.827	1.36382	7.69444	10.3739	14.0635	8.66667	10.4761	4.86818
8.99006	0	7.52778	9.9009	13.5873	8.50794	10.3489	4.45455
7.98807	10.1944	7.33333	8.73423	12.7619	8.22222	9.7125	3.62727
5.51093	9	5.75	7.56757	11.5556	7.36508	9.58523	3.11818
3.64612	8.91667	4.16667	7.31532	7.93651	6.38095	8.75795	1.81364
3.22863	7.94444	3.16667	7	7.90476	4.88889	8.72614	1.24091
1.64215	7.22222	2.94444	4.6982	7.20635	4.38095	8.40795	0.381818
0.139165	6.61111	1.94444	4.47748	6.85714	2.11905	8.08977	0.310227
0.104374	5.69444	0.270833	4.25676	6.25397	1.61905	7.45341	14.254
13.3889	4.52778	9.12917	3.72072	5.87302	12.9237	6.30795	11.5873
12.5556	3.22222	9.12917	3.40541	5.68254	11.8713	6.27614	8.25397
9.08333	2	8.75	2.36486	4.59524	11.8713	6.08523	7.80952
8.86111	1.33333	8.07917	1.4741	0	10.2768	4.08068	7.52381
8.52778	0.722222	4.34583	0.882883	0	10.1173	1.78182	6.8254
7.44444	0.361111	3.2375	13.65	13.9442	8.74601	13.3968	6.69841
3.44444	0.354167	2.47917	10.1182	12.9237	8.58656	10.254	6.69841
2.69444	12.374	2.07083	8.65455	11.4567	8.20387	9.71429	6.31746
0.472222	11.9948	1.6625	8.55909	10.8508	7.24715	9.61905	6.31746
0	9.10729	0.342708	6.77727	10.5	6.99203	9.30159	4.95238
0	7.67812	5.81372	6.17273	9.67084	6.92825	9.20635	3.1746
12.95	6.42396		5.82273	8.39522	6.0672	8.66667	3.01587
9.30417	5.92812		5.47273	7.37472	5.42938	8.66667	2.15873
8.10833	5.49062		4.77273	6.13098	4.91913	7.87302	2.03175
6.06667	4.64479		4.13636	5.97153	2.49544	7.52381	1.42063
5.83333	3.68229		2.35455	3.73918	1.81777	7.11111	12.1822
4.9875	3.47812		0.405682	2.7426	12.8597	6.34921	9.12073
3.99583	3.12812		0.35	0	12.2896	4.57143	8.8656
2.56667	1.34167		10.326	0	11.5928	3.83333	7.62187
2.275	7.45764		8.0159	12.543	10.8326	11.1298	7.30296
1.54583			7.23658	11.6561	10.3575	10.1093	5.93166
0.634375			6.56859	11.5611	10.1991	9.24829	5.93166
0.320833			6.34592	10.3258	9.97738	9.02506	5.89977
6.75614			5.78926	10.2624	8.64706	9.02506	5.07062
			3.95229	9.75566	8.61538	8.41913	4.4328
			3.92445	9.02715	8.58371	7.65376	4.4328
			2.4493	8.93213	6.58824	7.01595	3.82688
			2.14314	7.88688	3.76923	6.63326	3.38041
			0.890656	6.77828	0.506787	4.94305	2.63895
			0.528827	5.25792	0.443439	4.81549	12.836
			0.361829	4.181	0.403846	3.95444	11.9491
			0.0765408	0	11.0991	3.53189	11.5057
			9.75	0	10.4685	12.733	10.9355
			9.05556	0	9.68018	12.1946	9.89027
			7.66667	13.4955	9.45946	11.6561	9.44683
			7.5	12.6757	8.32432	11.4344	8.8767
			6.55556	12.3919	8.1036	10.5475	8.75
			6.13889	12.1396	8.00901	10.4525	8.40158
			5.52778	11.6351	8.00901	10.4525	7.7681
			3.55556	10.6577	7.47297	10.1991	7.29299
			0.75	9.93243	7.44144	10.0724	7.07127
			0.305556	9.58559	6.81081	9.91403	7.03959
			0.1875	9.49099	6.65315	9.88235	6.72285
			0	9.42793	5.54955	9.819	2.50226
			0	8.41892	4.0991	9.15385	10.2477
			0	5.73874	2.35698	8.55204	10.2162
			13.7083	4.38288	0	8.20362	10.0586
			7.84583	1.7027	11.3591	5.66176	9.86937
			6.67917	0	11.3273	5.22624	9.68018
			5.65833	14.2227	9.8	11.2331	9.23874
			4.87083	13.9045	9.70455	10.098	8.98649
			3.29583	13.3318	8.90909	9.75113	8.76577
			3.26667	12.7909	8.78182	9.65653	7.66216
			1.86667	12.0591	8.36818	9.1205	6.36937
			1.54583	11.6773	7.76364	8.93131	6.36937
			0.641667	11.6773	7.76364	8.89977	6.02252
			0.6125	10.3727	7.12727	8.71059	5.23423
			0.554167	9.76818	6.90455	8.30068	4.69032
			0.466667	9.67273	6.33182	8.01689	0.567568
			0.371875	6.49091	5.95	7.98536	11.9955
			0.35	6.42727	3.65909	7.35473	11.8045
			5.28874	5.56818	2.50568	6.91329	11.7409
				0	7.87674	6.75563	10.5636
				9.76938	6.98608	6.40878	10.0545
				9.46322	2.92247	5.77815	8.33636
				9.29622	2.4493	5.74662	8.01818
				7.76541	0.751491	4.50901	7.98636
				3.42346	0.605368	11.1364	7.47727
				0.807157	0.584493	10.7864	7.12727
				0.695825	0.417495	10.1182	6.77727
				0.500994	0.417495	9.83182	5.98182
				0.333996	0.361829	9.76818	5.85455
				0	0.139165	9.73636	4.41477
				0	0.111332	9.25909	8.5169
				0	0	9.16364	7.51491
				0	0	9.16364	7.51491
				0	8.19444	8.81364	7.34791
				12.0278	8.11111	8.68636	6.87475
				10.1667	7.47222	8.14545	6.62425
				7.27778	5.55556	7.92273	5.67793
				6.91667	3.75	6.84091	5.51093
				6.77778	3.63889	6.58636	4.89861
				6.77778	0.583333	5.82273	3.53479
				5.97222	0.527778	4.04091	2.56064
				3.33333	0.4375	4.03295	1.64215
				2.77778	0.222222	11.3837	1.25249
				2.52778	0.0277778	10.5487	0
				2.25	0.0277778	8.32207	8.38889
				0.638889	11.0833	8.1829	6.83333
				0.194444	8.10833	7.54274	6.55556
				0.0486111	6.41667	7.29225	6.19444
				8.4875	5.57083	6.03976	5.72222
				7.11667	3.15	5.51093	5.41667
				6.0375	2.8	5.3161	4.27778
				5.54167	0.816667	4.98211	3.94444
				5.30833	0.670833	4.59245	3.36111
				4.40417	0.670833	4.56461	3.05556
				3.85	0.408333	3.4165	2.16667
				3.675	0.379167	3.25646	0.75
				3.61667	0.35	3.2008	0.493056
				2.59583	0.138542	11.1667	0.222222
				2.1	0.116667	10.8611	10.4198
				0.780208	5.12723	10.0833	8.55312
				0		8.91667	6.89062
				0		8.91667	6.33646
				0		7.16667	6.07396
				5.54017		6.25	5.25729
						6.05556	4.55729
						5.25	4.03229
						4.27778	2.98229
						2.77778	2.74896
						1.80556	1.84479
						1.24306	1.64062
						0.472222	0.0875
						0.111111	5.50414
						10.3906
						10.2156
						8.90312
						7.73646
						7.56146
						6.94896
						6.68646
						6.30729
						5.40313
						4.14896
						4.14896
						3.24479

## Sheet: D42_4XALS_Male
D42-gal				D42-4XALS
sh-luci	sh-mCherry	sh-Unc5 (TRiP)	sh-Unc5 (kk)	sh-luci	sh-mCherry	sh-Unc5 (TRiP)	sh-Unc5 (kk)
14.5289	14.1556	12.88	13.3778	12.6	13.4711	13.9378	14.1556
14.4667	14.0622	12.0711	10.5156	11.4178	12.6311	13.5333	13.8444
14.4044	14	10.4533	8.58667	10.8578	12.04	12.88	13.3467
14.1556	13.5022	9.92444	8.15111	9.98667	11.76	11.9778	13.2222
13.6889	13.0356	5.78667	7.03111	9.30222	10.4533	11.4178	12.9733
13.0978	12.3511	2.20111	4.94667	8.71111	9.52	11.3867	12.5378
12.32	10.6089	0.186667	4.26222	8.30667	8.92889	11.3244	12.4133
11.5656	10.4222	0.155556	4.26222	7.84	8.64889	11.1067	12.4133
14.3794	9.24	0.155556	1.14333	7.59111	7.99556	9.89333	12.2889
14.3485	5.32	10.8794	0.373333	7.08556	7.62222	8.46222	11.9156
13.9768	2.17	7.62721	11.7699	2.58222	7.40444	7.43556	11.1067
13.2024	14.2555	6.91482	11.3982	0.777778	0.84	6.53333	10.92
12.6449	12.6139	4.59181	10.6239	0.591111	0.521111	5.74778	9.61333
10.6626	11.9635	4.52987	10.2212	0.373333	12.8617	13.1327	8.61778
7.68142	10.7555	4.52987	8.82743	0	12.6139	12.1106	8.12
14.5308	10.3529	0.681416	8.67257	12.6062	12.1184	10.1593	7.46667
14.4077	9.8573	12.8385	7.24779	10.9646	11.6228	10.1283	6.84444
14.4077	9.08296	12.6231	7.03097	10.6549	10.229	9.19912	5.84889
14.2846	7.78208	10.6231	0.240044	9.4469	8.89712	8.70354	0.303333
11.4846	7.03872	8.96154	0.0309734	9.19912	8.86615	8.30088	14
10.5	6.48119	7.82308	0	7.15487	8.52544	6.87611	13.8451
9.57692	5.49004	7.75385	10.6538	7.09292	8.09181	2.26106	13.2566
8.73846	3.99558	2.99231	10.4385	6.0708	4.77765	0.394912	13.1327
14.5174	13.9077	0.5	9.63846	5.45133	3.29093	13.3231	12.885
14.5174	13.5385	0.5	8.65385	5.17257	2.36173	12	12.3894
14.487	12.6769	0.376923	7.60769	4.52212	0.627212	12	12.2655
14.4261	11.8462	13.2163	7.57692	2.38496	0.123894	11.7846	12.2035
14.3043	11.6923	9.22935	6.93077	2.38496	14	10.8615	11.9248
14.0304	11.4154	8.04239	5.08462	0.178097	13.9692	9.84615	11.4292
13.3609	10.9231	7.4337	2.77692	0	13.3538	9.16923	11.3363
12.6	6	5.27283	1.63846	0	12.6154	8.55385	10.5929
9.16087	5.75385	2.16087	0.676923	12.8692	12.5846	4.52308	10.5619
0	5.50769	0.58587	13.1783	11.8231	9.84615	3.81538	10.2522
14.8522	3.22308	11.9304	12.1435	11.4846	9.56923	2.86154	8.88938
14.5174	13.9391	11.7174	11.8391	10.5923	9.26154	2.82308	8.73451
14.1826	13.9087	9.40435	7.88261	10.1	8.21538	14.1826	8.5177
14.0913	13.7261	6.75652	7.82174	9.36154	7.63077	13.8478	7.96018
13.9696	12.0522	4.65652	6.96957	9.3	6.83077	13.5435	7.68142
13.5739	11.9304	0.7	5.63043	8.43846	5.65385	13.2391	5.32743
12.6	10.0739	0.7	4.56522	7.91538	13.7261	13.0565	4.02655
4.59565	9.8	0.357609	0.844565	7.54615	12.6609	10.8957	1.61062
1.45326	4.93043	13.7662	0.182609	1.33077	10.6522	10.713	0.92146
0.243478	3.80435	13.4739	12.113	0.561538	10.2261	9.40435	14.2154
13.6858	2.61739	11.3111	12.0826	0.284615	9.0087	7.97391	14.0308
13.6858	13.3685	8.79749	9.1913	0.0923077	8.36957	6.87826	13.8462
13.6566	13.3076	7.1023	7.51739	0	5.53913	4.07065	13.8154
13.6273	13.2467	5.81628	5.35652	13.5739	4.2	3.92609	13.4769
13.1597	12.3033	5.72129	2.13043	12.0826	1.4	14.0304	12.8615
11.9906	10.6598	13.115	0.730435	10.8957	0.996739	13.1783	12.4
6.22547	9.13804	9.25626	0.669565	9.98261	0.517391	12.9957	12.1846
0	8.01196	9.09681	0.486957	9.46522	13.8478	12.5087	11.2308
11.9271	7.31196	8.96925	0.266304	9.31304	11.1696	11.5652	10.8308
9.69476	7.19022	6.51367	11.048	8.79565	11.1391	9.98261	10.6769
8.48292	1.36957	4.37699	9.29436	7.27391	9.34348	9.98261	10.1538
8.22779	12.977	1.9533	9.08977	6.84783	7.18261	8.09565	9.66154
7.90888	12.6848	0.83713	8.82672	4.35217	6.51304	7.91304	9.63077
6.37813	12.3048	0.582005	8.00835	0.121739	5.14348	5.84348	9.26154
5.61276	11.8664	0.167426	7.39457	0.0532609	2.76957	4.68696	8.67692
5.26196	10.8727	0	6.75157	14.3348	2.67826	3.00543	7.90769
4.49658	10.2589	12.2579	1.3737	13.787	1.81848	14.0292	6.58462
2.00911	9.06054	11.0226	0.555324	11.8391	0.486957	13.8831	5.29231
1.97722	5.46555	10.1357	0.292276	9.73913	13.737	13.8539	0.361538
0.342825	3.09081	9.91403	0.0803758	8.70435	12.071	11.3695	14.1598
13.4061	2.80585	9.56561	13.0831	7.57826	9.87891	11.0188	14.1293
12.2975	10.7153	9.47059	12.1583	7.39565	7.21921	10.9603	13.9467
9.82692	9.34396	9.37557	8.93736	6.11739	4.41336	4.00418	13.8859
9.57353	9.31207	9.28054	7.31093	4.38261	4.15031	1.89979	13.3989
8.46493	9.24829	6.96833	6.51367	3.65217	2.25052	1.65866	12.8207
7.79977	8.83371	2.31222	4.53645	3.46957	0.781837	10.9066	9.625
2.38348	8.61048	0.918552	1.34738	3.22609	0.526096	9.75854	9.59457
2.09842	8.06834	0.752262	0.709567	2.61739	0.321503	9.72665	8.07283
0.324661	7.90888	13.7768	0.47836	0.692391	13.9681	8.13212	0.730435
0	5.95558	12.4374	0.390661	0.0913044	12.2141	8.00456	13.2391
14.3588	13.5882	11.5444	12.1391	13.072	11.672	7.90888	13.0261
13.9761	12.543	11.2893	9.41516	11.8445	11.1936	7.58998	9.40435
13.3383	10.5475	10.1412	8.27489	11.6983	9.82232	7.33485	8.55217
10.9465	9.85068	9.50342	6.08937	10.5	7.74943	7.20729	4.56522
7.85308	9.59729	5.51708	4.72738	10.0324	6.8246	7.1754	0
7.78929	9.24887	0.669704	3.68213	7.89875	6.8246	6.85649	13.9123
6.99203	9.02715	0.534169	2.89027	6.99269	6.37813	6.60137	12.7724
6.7369	7.95023	0.095672	2.63688	6.20355	5.77221	6.50569	12.2756
3.42027	6.52489	0.095672	0.197964	6.11587	5.23007	4.81549	10.2881
0.518223	5.75679	7.90769	0.190045	5.50209	4.7836	4.30524	9.79123
0.510251	14.6378	5.10769	13.3622	3.25157	4.71982	2.16856	6.8977
0.071754	13.7768	5.04615	11.2255	0.387265	4.68793	2.07289	5.20251
13.1769	12.1185	4.03077	10.6515	0.0584551	4.36902	1.97722	5.05637
11.8538	10.3007	2.12308	9.85421	11.6082	3.79499	1.88155	0.86952
10.5615	9.94989	1.72308	4.52847	11.0661	2.99772	1.56264	13.139
10.3154	6.72893	0.830769	2.99772	10.6196	1.43508	0.892938	12.6606
9.42308	4.40091	0.792308	2.42369	9.2164	1.08428	0.11959	12.4374
8.5	1.24374	0.553846	0.382688	3.63554	1.05239	10.9355	10.0456
5.97692	0.374715	11.713	0.095672	0.765376	0.510251	10.4921	9.31207
3.79231	0.127563	7.20088	0.0876993	0.542141	0.446469	10.1753	7.36674
0.615385	0.127563	6.49007	0.0318907	0.446469	0.183371	9.92195	6.98405
13.2274	14.1538	3.24503	9.60769	0.414579	13.7783	9.03507	5.86788
12.9492	13.9692	3.21413	8.68462	0.414579	11.7828	8.27489	4.81549
11.7748	13.9385	1.57616	7.33077	0.414579	10.8959	7.67308	1.08428
10.5695	8.95385	1.35982	6.68462	0.287016	9.69231	7.22964	0.287016
8.62252	5.72308	0.45585	0.438462	0.287016	9.53394	6.88122	0.247153
7.10817	3.50769	6.78319	0.253846	0.159453	9.0905	5.89932	13.905
4.234	1.50769	6.62832	0.192308	0.0637813	8.39367	5.48756	13.7149
4.01766	0.0538462	5.82301	0	0	8.29864	4.15724	13.5566
1.57616	14.1854	5.51327	11.6821	14.1584	6.96833	3.87217	13.2398
0.239514	14.1545	5.07965	10.8168	12.1312	5.79638	3.65045	7.06335
9.5708	14.1545	4.58407	10.5077	8.20362	5.19457	2.89027	6.0181
8.82743	13.9691	3.25221	7.9117	7.09502	4.9095	2.13009	5.41629
8.45575	13.9382	0.487832	4.41943	6.08145	4.84615	1.90837	4.94118
7.65044	13.7837	0	0.772627	5.47964	3.8009	1.78167	3.45249
4.30531	13.1965	7.34091	0.587196	3.16742	2.72398	1.75	3.42081
1.67257	12.5166	3.91667	0.424945	2.85068	2.24887	0.285068	0.213801
0.650442	12.3311	3.67424	0.309051	2.43891	2.21719	9.8861	13.1708
0.619469	12.1148	0.545455	11.4292	0.791855	1.86878	9.53531	12.246
0.611726	11.1567	0.431818	7.61947	0.696833	0.823529	8.06834	11.8314
0.371681	10.6623	0.431818	7.49558	0.570136	0.538462	7.74943	10.492
0.216814	7.75717	0.401515	7	0.411765	0.498869	7.68565	8.76993
13.2424	4.91391	0.340909	1.79646	0.348416	0.285068	7.62187	8.67426
10.7273	3.33775	0.280303	0.402655	0.253394	12.1185	7.49431	7.8451
7.06061	3.0287	0.0378788	0.185841	0.118778	11.3212	7.27107	7.27107
3.39394	2.50331	10.5	0	0.0633484	9.72665	7.23918	6.76082
1.9697	1.94702	7.71795	0	10.205	7.20729	7.20729	6.66515
1	1.39073	0.800214	10.697	8.92938	6.18679	5.99544	4.81549
0.363636	0.649007	0.358974	9.24242	8.48292	5.74032	5.86788	0
0.295455	0.146799	0.299145	7.09091	7.01595	5.67654	5.64465	0
13.6111	13.7522	0.269231	6.81818	7.01595	5.16629	5.26196	13.6923
13.1325	10.6858	0.149573	4.33333	6.76082	4.65604	4.75171	13.5692
10.0513	10.6549	7.59978	0.333333	3.53986	4.24146	3.82688	13.1692
9.72222	10.2522	6.99241	0.181818	2.77449	4.14579	3.79499	12.2769
7.86752	10.0973	5.20065	0.0909091	2.32802	2.96583	3.34852	12.2154
6.55128	8.88938	0.79718	13.2821	1.59453	1.43508	1.75399	7.78462
4.87607	8.85841	0.706074	12.7735	0.542141	1.30752	0.255125	4.09231
1.19658	8.76549	0.516269	12.2949	0.510251	1.05239	0.247153	3.04615
0.837607	8.48673	0.493492	8.61538	0.510251	0.605923	10.1538	0.338462
0.411325	7.77434	0.280911	8.19658	0.446469	0.446469	9.81538	0.207692
13.5748	6.50442	0.129067	6.64103	0.223235	0.310934	8.8	0.184615
13.2104	5.73009	11.2803	2.96154	0	0.159453	8.76923	13.9768
11.449	5.60619	9.64394	0.628205	0	0.0637813	8.67692	13.5442
10.0824	4.92478	8.70455	0.560897	12.1846	0	8.09231	11.7826
6.25597	4.86283	7.79545	13.5445	10.3692	12.3692	7.6	9.24834
5.64859	3.09735	6.61364	11.8134	6.09231	12	7.56923	7.82671
0.4859	2.38496	6.52273	9.74837	5.07692	11.4154	6.89231	2.44923
0.296095	0.743363	5.94697	8.62473	3.23077	9.69231	6.73846	2.04746
13.947	0.526549	5.67424	7.65293	0.861538	9.04615	6.52308	0.502208
12.8258	0	5.43182	6.13449	0.615385	8.83077	5.96923	0.254967
11.5833	13.8788	4.70455	3.18872	0.615385	7.13846	5.78462	0.12362
9.61364	12.9091	2.64394	2.39913	0.430769	6.49231	4.61538	14.3097
8.46212	12.8485	1.97727	0.296095	0.369231	6.46154	3.81538	13.8142
8.12879	12.1515	0.371212	9.43182	0.123077	5.47692	3.16923	13.5664
7.49242	12.0909	0	7.82576	0.0538462	5.44615	2.95385	12.7611
7.46212	10.0909	0	6.94697	13.4746	3.90769	1.81538	10.5
5.40152	10.0303	13.3722	6.34091	10.4459	3.87692	1.75385	9.5708
4.18939	9.72727	10.9186	6.2197	10.0751	3.2	0.861538	9.19912
2.15909	8.9697	10.832	5.85606	9.117	2.70769	0.769231	6.56637
0.606061	8.72727	9.90825	5.46212	2.99779	2.64615	0	4.58407
11.9216	8.72727	9.64845	5.43182	2.07064	2.30769	11.4349	0.309735
10.6227	8.54545	8.03196	5.18939	1.8543	0.553846	11.4349	0.147124
10.5361	7.90909	7.71443	4.31061	0.865342	0.4	11.1258	13.7273
9.78557	4.84848	7.07938	2.79545	0.649007	0.215385	10.7859	13.6061
5.4268	4.57576	4.65464	1.27273	0.525386	0.0230769	9.58057	12.7576
5.08041	1.90909	3.35567	0.189394	0.339956	6.64459	9.30243	8.33333
4.04124	0.575758	2.72062	11.5247	0.208609	5.28477	9.20971	7.54545
3.75258	0.545455	0.7	11.0052	0.18543	4.79029	8.83885	7.33333
2.91546	0.393939	0.7	8.11856	5.85398	4.17219	8.56071	5.36364
1.86907	0.265152	0.642268	6.93505	3.99558	0.370861	8.43709	5.33333
13.6884	0.151515	0.404124	6.61753	2.23009	0.339956	8.09713	4.78788
13.1957	13.3793	12.5507	5.20309	0.619469	0.146799	7.3245	0.143939
12.2391	12.8707	10.6667	4.45258	0.619469	0.0618102	6.6755	0
11.6884	12.1528	10.3478	4.01959	0.588496	9.72566	6.30464	0
11.2246	10.8964	10	3.81753	0.371681	8.76549	4.79029	11.6966
10.1522	10.4476	9.85507	3.75979	0.340708	8.42478	1.76159	9.15385
8.21014	8.80235	8.37681	2.98041	0.340708	7.4646	0.896247	8.49573
7.65942	8.80235	7.94203	0	0.278761	4.73894	0.494481	5.7735
7.31159	8.41346	7.68116	11.7101	0.216814	3.12832	0.494481	4.33761
5.71739	7.54594	6.02899	11.0145	0.0542035	0.464602	0.486755	4.00855
5.21739	7.00748	5.94203	10.9565	10.5455	0.271018	11.0885	1.31624
13.9431	6.52885	4.69565	7.76812	7.48485	6.06061	9.4469	0.321581
13.2317	5.6015	3.97101	6.78261	4.18182	2.15152	8.9823	0.0897436
12.7195	4.31517	3.76812	6.63768	3.93939	0.606061	7.96018	0
12.435	4.10577	3.44203	5.47826	0.386364	0.212121	7.68142	14.1518
11.8659	2.1015	13.0041	5.42029	0.363636	0.030303	6.28761	14.0607
11.126	1.89209	12.435	5.33333	0.30303	0.030303	5.9469	13.3015
9.64634	0.448718	10.1301	4.43478	0.272727	0	5.79204	9.6269
8.87805	0.396368	9.47561	4.37681	0.212121	0	5.73009	8.68547
8.28049	0.276709	9.21951	1.73188	0.0909091	7.86752	5.51327	5.95228
7.42683	0	8.82114	1.50725	0.0606061	1.37607	5.29646	4.859
6.93598	12.9371	7.79675	11.56	0.030303	0.448718	4.46018	4.3731
6.34553	12.7852	7.11382	10.8486	0.030303	0.32906	4.24336	2.76356
1.19512	12.2993	6.65854	9.05589	5.29487	0.269231	3.40708	0.425163
1.13821	12.2082	6.28862	8.65752	3.26068	0	2.78761	0.182213
0	10.3254	6.20325	5.27134	2.48291	0	1.73451	0.0835141
11.9668	10.2039	6.1748	5.07215	1.76496	8.68547	1.61062	13.2121
10.9212	9.68764	5.26423	5.01524	0.680556	5.16269	0.704646	11.7879
9.38174	8.44252	5.00813	4.75915	0.65812	3.58351	10.6364	8.75758
9.23651	8.35141	5.00813	4.75915	0.478632	1.33623	10.303	8.27273
9.0332	7.86551	0.48374	4.44614	0.478632	0.819957	9.42424	8.12121
7.49378	7.34924	0.362805	3.76321	0.388889	0.151844	9.27273	7.90909
6.70954	5.19306	10.7469	3.62093	0.299145	0.151844	7.87879	7.63636
6.6805	5.01085	10.6598	1.99187	0.149573	0.113883	7.54545	7.24242
6.65145	2.30803	9.96266	9.87552	0.119658	11.8864	7.54545	6.75758
6.361	2.03471	9.52697	9.38174	5.64859	10.2803	6.90909	5.36364
5.80913	1.9436	8.04564	9.00415	4.79826	9.97727	6.57576	3.33333
5.28631	1.7538	7.81328	5.54772	1.21475	6.76515	6.39394	2.69697
1.99689	1.60954	5.89627	5.37344	1.18438	5.97727	4.72727	2.12121
1.21992	0.880694	5.86722	5.19917	0.759219	5.94697	3.66667	1.56818
13.2971	14.0985	5.78008	4.70539	0.698482	5.91667	3.30303	11.9577
12.887	13.8864	5.25726	4.56017	0.425163	4.46212	3.0303	11.4959
12.8285	13.7348	3.60166	3.89212	0.394794	4.25	2.81818	9.90825
12.2427	12.5227	2.93361	3.19502	0.364425	3.2197	2.66667	9.41753
11.3347	10.6136	0.639004	2.6722	0.273319	0.825758	1.75758	9.41753
10.6318	9.43182	0.580913	0.174274	0.273319	0.462121	1.75758	9.15773
8.69874	7.49242	0.457469	0	0	0.159091	0.666667	7.80103
8.37657	0.363636	13.1213	12.045	0	0.030303	0.628788	6.3
7.32218	0.310606	12.4184	11.137	0	11.9794	0.030303	4.91443
0.432008	11.7845	11.2176	9.55544	11.8182	11.1134	11.8462	4.59691
0.0878661	10.2546	10.5146	7.73954	10.3939	9.9299	11.2179	4.22165
13.8706	10.0814	9.92887	6.48013	9.78788	7.30309	11.0983	3.55773
12.4882	9.79278	8.49372	6.39226	9.36364	7.21649	10.4701	3.55773
11.7747	8.75361	7.76151	5.48431	9.09091	7.10103	9.75214	2.63402
11.5964	7.85876	6.7364	4.86925	8.63636	6.8701	8.34615	1.38557
11.2842	5.52062	6.41423	4.2249	8.45455	6.23505	7.98718	13.942
10.9052	4.76289	5.59414	3.55126	7.87879	4.44536	7.92735	12.7246
10.37	13.8551	4.56904	2.1454	6.75758	3.14639	7.83761	12.2609
10.0802	13.8261	3.86611	0.644351	6.33333	2.36701	7.29915	12.087
7.53838	13.1014	1.36925	11.8618	4.87121	1.76082	6.52137	11.7101
7.33771	12.8116	13.5585	8.74026	0	1.09691	6.49145	11.5942
7.22622	12.2029	12.3767	7.40247	9.93711	0.981443	6.25214	10.3188
0.673961	10.8116	11.9754	6.88964	9.47526	0.461856	5.95299	10
0.559545	9.62319	11.5295	6.06467	9.30206	14.1159	5.29487	7.91304
14.0553	9.50725	11.5295	5.1951	9.0134	10.8696	5.1453	7.53623
13.8989	5.30435	8.89847	4.74917	8.69588	9.73913	4.69658	7.07246
12.804	4.86232	8.89847	4.5485	8.08969	8.63768	4.27778	6.92754
12.7816	10.9055	8.0512	4.23635	7.68557	8.31884	4.27778	6.05797
12.6028	9.82419	8.0066	3.63434	6.18454	7.88406	0.538462	4.98551
9.45214	9.79573	6.84718	1.73913	5.69381	6.72464	0.358974	0.0217391
9.31806	9.53963	5.46479	0.272222	5.23196	6.4058	0.0598291	14.1138
8.73708	9.19817	5.13034	11.2398	4.79897	5.36232	0	13.2317
8.37955	9.1128	4.92968	10.0108	4.59691	3.53623	10.538	12.5772
13.7739	8.34451	3.88174	9.51917	2.63402	2.26087	10.1735	12.2073
13.3005	7.40549	3.50269	8.78177	2.19381	2.23188	8.68547	11.0976
12.8947	7.39837	0.8494	8.31252	14.058	2.2029	8.59436	10.6423
12.4889	0.547764	0.199125	7.84326	13.8261	1.15217	7.92625	9.9878
10.6629	13.8548	12.9157	6.56957	13.2174	12.5488	7.56182	9.70325
10.3023	13.2739	11.7314	3.66466	12.058	12.0366	6.55965	8.39431
10.0092	13.0124	11.2398	3.03899	11.3913	11.6667	5.3449	7.73984
9.53578	12.722	11.061	0	10.9855	11.0691	3.94794	6.34553
9.37798	10.7469	10.5247	13.0976	9.91304	11.0691	3.7961	5.94715
7.68724	10.5726	10.0555	11.3392	9.07246	8.87805	3.58351	1.47256
5.52309	10.3402	9.34041	11.0236	7.65217	8.87805	3.3102	12.9834
1.58161	6.85477	9.20634	10.3023	5.21739	7.96748	2.85466	12.7801
13.5248	6.79668	8.87115	7.01094	5.21739	7.22764	2.76356	10.7178
12.9213	4.12448	6.99413	6.76297	4.14493	6.11789	1.88286	10.2531
12.7705	0.406639	6.88241	6.69534	2.60145	2.33333	1.51844	7.43568
12.5291	0	3.21775	6.13176	13.8648	2.21951	0.72885	7.43568
10.93	12.2134	0.357527	4.35084	13.6372	1.67886	0.546638	7.43568
10.8696	12.2134	0.127666	2.9757	12.186	0.476626	0.326464	7.37759
10.2662	11.8033	12.4213	1.6682	11.8161	0.341463	12.947	6.97095
8.72737	11.2762	11.9705	0.228584	11.7307	0.313008	11.4924	6.44813
8.60668	10.0753	10.415	11.0808	11.6738	12.9253	11.25	6.24481
6.16272	9.16736	10.2346	9.11961	10.7632	11.2116	9.76515	5.40249
5.46875	5.38912	9.46816	7.12823	10.5925	8.19087	8.85606	5.08299
2.14224	4.10042	9.15255	6.85668	10.5925	6.56432	8.00758	4.93776
12.6364	2.22594	8.07048	6.79634	10.0234	6.15768	7.91667	1.18361
12.4848	1.34728	7.57453	5.52909	8.37297	5.0249	7.46212	12.5356
11.8485	1.08368	5.95141	5.34806	8.00305	3.97925	6.61364	12.5356
10.7273	13.7744	4.59882	4.8653	7.5122	3.02075	6.31061	11.7448
10.4242	11.7455	3.47166	4.74461	11.5021	2.41079	5.9697	11.5983
7.69697	10.1847	3.26877	3.9903	10.4564	1.94606	5.70455	11.3347
7	10.0063	1.91617	2.93427	10.4274	1.80083	14.0361	10.5146
5.69697	9.33742	1.62311	0	8.3361	1.71369	12.5928	10.3096
4.24242	9.09216	1.16915	0	7.34855	1.45228	12.4485	9.28452
3.62879	8.37867	10.5905	12.5833	7.02905	0.544606	11.467	9.22594
13.4891	5.61389	9.71552	10.7045	6.82573	13.6485	9.99485	8.0251
8.60893	5.39092	8.87069	10.0682	6.82573	13.59	9.93711	7.99582
8.09041	3.89705	8.68966	9.46212	5.9834	13.1799	9.64845	7.08787
7.44989	3.78557	8.62931	8.40152	5.43154	12.9456	8.78247	6.03347
5.61983	2.69584	8.23707	7.82576	4.50207	11.5397	8.55155	5.62343
5.37582	14.0553	7.84483	7.55303	3.92116	9.57741	8.32062	5.32322
5.04031	13.6754	5.97414	7.37121	2.49793	9.46025	7.88763	12.8799
4.15577	13.4967	4.79741	6.43182	1.99689	9.0795	4.04124	12.5231
0.305011	10.8822	4.73707	6.12879	13.9487	7.49791	14.1812	12.2778
0.282135	9.98843	3.95259	4.67424	13.8023	6.91213	12.413	10.8509
0	8.71474	3.5	4.64394	12.25	6.29707	11.7174	10.5387
	7.50808	2.53448	4.15152	10.522	4.9205	11.5725	10.3826
	7.39635	2.11207	6.37473	9.55544	2.98745	10.3841	9.29011
	7.12821	0	6.34423	9.52615	2.0795	10.2391	7.93002
	5.18415	12.7879	5.45969	9.11611	0.380753	9.60145	7.61787
	4.57942	12	5.24619	8.12029	0.373431	8.93478	7.50638
	14.0895	10.4545	5.09368	7.18305	13.0658	8.87681	7.35031
	13.8641	8.78788	4.39216	6.94874	10.6801	8.78261	6.0571
	13.7288	8.09091	4.30065	4.42992	9.05241	13.8008	5.39168
	12.7595	6.45455	3.59913	2.409	8.22744	13.7439	5.18754
	12.0606	6.21212	1.64706	2.409	6.46601	12.9472	14.033
	11.6098	5.93939	0.457516	2.02092	6.37682	12.4634	13.2285
	11.2942	5.90909	0.396514	13.7801	5.50726	11.752	12.7369
	9.91902	5.15152	0.244009	13.6686	5.30659	11.752	12.6028
	9.62596	5.12121	0.244009	13.1781	4.52621	11.6098	12.4464
	6.69534	2.66667	0.114379	11.5281	4.19176	11.439	12.4017
	6.49245	2.63636		10.3241	3.2553	10.0732	11.5079
	4.89188	2.62879		9.12007	2.38573	9.39024	11.3068
	4.03524	11.5294		8.76333	1.58306	7.8252	9.94374
	0.0837089	10.8889		8.65185	0.602008	7.05691	8.93819
	13.6983	8.4488		7.93836	0.356744	6.82927	8.08906
	12.5216	6.52723		7.73769	0	6.73679	6.01093
	11.0431	6.40523		6.91271	12.5582	12.0249	3.41886
	10.0776	6.19172		5.95396	12.2006	11.8216	2.458
	9.32328	5.33769		0.291028	10.2342	10.6598	0.328589
	8.84052	5.24619		12.6028	9.47448	9.58506	13.7739
	8.78017	4.39216		12.0889	8.67004	9.55602	12.3988
	6.96983	4.02614		11.9772	8.29017	9.06224	11.5421
	5.18966	3.41612		10.5694	6.59192	8.9751	11.1589
	4.82759	1.22004		9.54152	5.89921	8.27801	10.7982
	0.0528017	0		9.11696	4.31268	6.91286	10.1895
	10.8258	0		8.78177	3.82108	6.12863	8.67914
	9.88636			7.9103	2.77084	4.82158	8.29591
	9.61364			7.84326	2.54029	4.50207	7.77741
	8.61364			7.28463	2.30158	4.12448	6.60516
	8.37121			0.736068	12.534	0.428423	6.60516
	8.00758			12.7406	11.4294	13.5973	5.36529
	7.34091			11.4106	11.3843	11.7814	3.85489
	6.06818			9.83256	9.71613	11.7228	1.30751
	5.97727			9.35915	8.56643	11.4885	0.858045
	5.82576			7.69096	7.48435	11.4299	13.3966
	4.51515			7.33026	7.12366	10.9027	12.8233
	11.4379			7.28518	6.85314	10.9027	9.98707
	8.2658			6.11293	3.69709	10.0241	9.32328
	7.77778			5.70715	3.53929	9.76046	7.60345
	7.19826			4.62508	1.73583	8.44247	7.5431
	6.43573			3.97132	1.26242	7.65167	6.81897
	6.03922			2.10619	1.23988	5.89435	5.64224
	5.27669			13.6681	0.698839	1.37657	3.86207
	5.06318			12.1595	0.358162	13.6949	3.80172
	4.75817			11.3448	10.1455	12.6024	3.04741
	4.14815			9.41379	10.1153	12.1119	2.89655
	0.14488			9.2931	8.39547	12.0896	1.29741
				8.59914	7.8222	11.3538	0.505388
				6.78879	6.82651	11.2869	0.150862
				5.94397	6.64547	10.5511	11.7652
				5.55172	5.28772	10.4396	9.88636
				4.19397	4.89547	9.94912	9.34091
				4.07328	4.53341	9.85994	9.00758
				3.04741	4.44289	9.30252	8.70455
				0.603448	4.29203	9.10185	8.40152
				0.0528017	4.23168	8.7897	6.91667
				13.0303	3.62823	8.74511	6.43182
				12.697	1.35776	8.72281	5.06818
				11.1515	12.2727	7.67487	4.58333
				9.57576	11.1515	7.18435	3.31061
				9.12121	9.87879	6.2033	2.58333
				8.84848	9.39394	5.37832	2.06818
				6.39394	9.33333	5.15536	2.0303
				5.36364	8.93939	5.15536	10.317
				5.24242	8.78788	3.26015	10.134
				5.21212	7.9697	2.05613	8.39542
				4.69697	7.87879	1.54705	8.02941
				3.57576	7.51515	14.167	7.6329
				2.87879	6.42424	11.9995	7.41939
				0	3.72727	11.7537	5.25381
				11.2244	2.93939	11.7314	4.61329
				10.2484	2.54545	11.709	4.39978
				9.54684	1.17424	11.642	4.33878
				7.44227	12.1776	11.1057	3.85076
				6.52723	11.4455	10.3236	1.9902
				6.22222	11.0795	10.2119	1.86819
				4.75817	9.64597	10.1225	1.10566
				4.39216	8.79194	10.0331	0.732026
				3.50763	8.57843	9.72028
				3.23312	7.7854	9.29572
				2.8671	7.44989	8.24548
				1.89107	4.9488	7.93264
				0.732026	4.27778	7.23993
				0.205882	3.85076	6.74833
					0.770153	5.83217
					0.465142	5.1618
					0.244009	3.88863
					0.190632	3.59762
						13.5485
						13.0074
						12.8271
						12.5791
						12.3988
						11.4745
						11.0011
						10.3248
						9.55833
						9.53578
						9.06238
						8.40862
						8.40862
						8.00284
						7.91267
						7.28146
						6.65025
						6.40228
						5.90632
						4.35084
						3.85489
						3.60692
						0.996052
						11.5032
						10.5377
						9.93427
						9.69289
						9.66272
						9.33082
						9.21013
						8.06358
						7.58082
						6.88685
						5.89116
						4.65409
						4.50323
						2.87392
						0.0301724
						12.303
						10.3636
						9.54545
						9.33333
						9.06061
						8.93939
						8.78788
						8.72727
						7.84848
						6.45455
						6.42424
						5.30303
						4.21212
						4.21212
						2.56818
						9.69935
						8.63181
						8.3878
						7.83878
						6.74074
						6.49673
						5.5207
						5.45969
						5.00218
						4.97168
						4.91068
						4.05664
						3.96514
						3.34749
						12.947	13.2121
						11.4924	11.7879
						11.25	8.75758
						9.76515	8.27273
						8.85606	8.12121
						8.00758	7.90909
						7.91667	7.63636
						7.46212	7.24242
						6.61364	6.75758
						6.31061	5.36364
						5.9697	3.33333
						5.70455	2.69697
							2.12121
							1.56818
						14.0361	11.9577
						12.5928	11.4959
						12.4485	9.90825
						11.467	9.41753
						9.99485	9.41753
						9.93711	9.15773
						9.64845	7.80103
						8.78247	6.3
						8.55155	4.91443
						8.32062	4.59691
						7.88763	4.22165
						4.04124	3.55773
							3.55773
							2.63402
							1.38557
						14.1812	13.942
						12.413	12.7246
						11.7174	12.2609
						11.5725	12.087
						10.3841	11.7101
						10.2391	11.5942
						9.60145	10.3188
						8.93478	10
						8.87681	7.91304
						8.78261	7.53623
							7.07246
							6.92754
							6.05797
							4.98551
							0.0217391
						13.8008	14.1138
						13.7439	13.2317
						12.9472	12.5772
						12.4634	12.2073
						11.752	11.0976
						11.752	10.6423
						11.6098	9.9878
						11.439	9.70325
						10.0732	8.39431
						9.39024	7.73984
						7.8252	6.34553
						7.05691	5.94715
						6.82927	1.47256
						6.73679
						12.0249	12.9834
						11.8216	12.7801
						10.6598	10.7178
						9.58506	10.2531
						9.55602	7.43568
						9.06224	7.43568
						8.9751	7.43568
						8.27801	7.37759
						6.91286	6.97095
						6.12863	6.44813
						4.82158	6.24481
						4.50207	5.40249
						4.12448	5.08299
						0.428423	4.93776
							1.18361
						13.5973	12.5356
						11.7814	12.5356
						11.7228	11.7448
						11.4885	11.5983
						11.4299	11.3347
						10.9027	10.5146
						10.9027	10.3096
						10.0241	9.28452
						9.76046	9.22594
						8.44247	8.0251
						7.65167	7.99582
						5.89435	7.08787
						1.37657	6.03347
							5.62343
							5.32322
						13.6949	12.8799
						12.6024	12.5231
						12.1119	12.2778
						12.0896	10.8509
						11.3538	10.5387
						11.2869	10.3826
						10.5511	9.29011
						10.4396	7.93002
						9.94912	7.61787
						9.85994	7.50638
						9.30252	7.35031
						9.10185	6.0571
						8.7897	5.39168
						8.74511	5.18754
						8.72281
						7.67487
						7.18435
						6.2033
						5.37832
						5.15536
						5.15536
						3.26015
						2.05613
						1.54705
						14.167	14.033
						11.9995	13.2285
						11.7537	12.7369
						11.7314	12.6028
						11.709	12.4464
						11.642	12.4017
						11.1057	11.5079
						10.3236	11.3068
						10.2119	9.94374
						10.1225	8.93819
						10.0331	8.08906
						9.72028	6.01093
						9.29572	3.41886
						8.24548	2.458
						7.93264	0.328589
						7.23993
						6.74833
						5.83217
						5.1618
						3.88863
						3.59762
						13.5485	13.7739
						13.0074	12.3988
						12.8271	11.5421
						12.5791	11.1589
						12.3988	10.7982
						11.4745	10.1895
						11.0011	8.67914
						10.3248	8.29591
						9.55833	7.77741
						9.53578	6.60516
						9.06238	6.60516
						8.40862	5.36529
						8.40862	3.85489
						8.00284	1.30751
						7.91267	0.858045
						7.28146
						6.65025
						6.40228
						5.90632
						4.35084
						3.85489
						3.60692
						0.996052
						11.5032	13.3966
						10.5377	12.8233
						9.93427	9.98707
						9.69289	9.32328
						9.66272	7.60345
						9.33082	7.5431
						9.21013	6.81897
						8.06358	5.64224
						7.58082	3.86207
						6.88685	3.80172
						5.89116	3.04741
						4.65409	2.89655
						4.50323	1.29741
						2.87392	0.505388
						0.0301724	0.150862
						12.303	11.7652
						10.3636	9.88636
						9.54545	9.34091
						9.33333	9.00758
						9.06061	8.70455
						8.93939	8.40152
						8.78788	6.91667
						8.72727	6.43182
						7.84848	5.06818
						6.45455	4.58333
						6.42424	3.31061
						5.30303	2.58333
						4.21212	2.06818
						4.21212	2.0303
						2.56818
						9.69935	10.317
						8.63181	10.134
						8.3878	8.39542
						7.83878	8.02941
						6.74074	7.6329
						6.49673	7.41939
						5.5207	5.25381
						5.45969	4.61329
						5.00218	4.39978
						4.97168	4.33878
						4.91068	3.85076
						4.05664	1.9902
						3.96514	1.86819
						3.34749	1.10566
							0.732026

## Sheet: Ordinary one-way ANOVA female
Table Analyzed	D42 #31 female-2
Data sets analyzed	A, B, E-H
ANOVA summary
F	15.81
P value	<0.0001
P value summary	****
Significant diff. among means (P < 0.05)?	Yes
R squared	0.04295
Brown-Forsythe test
F (DFn, DFd)	12.71 (5, 1762)
P value	<0.0001
P value summary	****
Are SDs significantly different (P < 0.05)?	Yes
Bartlett's test
Bartlett's statistic (corrected)	27.13
P value	<0.0001
P value summary	****
Are SDs significantly different (P < 0.05)?	Yes
ANOVA table	SS	DF	MS	F (DFn, DFd)	P value
Treatment (between columns)	1341	5	268.2	F (5, 1762) = 15.81	P<0.0001
Residual (within columns)	29880	1762	16.96
Total	31221	1767
Data summary
Number of treatments (columns)	6
Number of values (total)	1768

## Sheet: Ordinary one-way ANOVA male
Table Analyzed	D42 #31 male-2
Data sets analyzed	A, B, E-H
ANOVA summary
F	32.19
P value	<0.0001
P value summary	****
Significant diff. among means (P < 0.05)?	Yes
R squared	0.06006
Brown-Forsythe test
F (DFn, DFd)	13.42 (5, 2519)
P value	<0.0001
P value summary	****
Are SDs significantly different (P < 0.05)?	Yes
Bartlett's test
Bartlett's statistic (corrected)	38.56
P value	<0.0001
P value summary	****
Are SDs significantly different (P < 0.05)?	Yes
ANOVA table	SS	DF	MS	F (DFn, DFd)	P value
Treatment (between columns)	2665	5	532.9	F (5, 2519) = 32.19	P<0.0001
Residual (within columns)	41703	2519	16.56
Total	44368	2524
Data summary
Number of treatments (columns)	6
Number of values (total)	2525
