# Supplementary material for: Axon guidance genes modulate neurotoxicity of ALS-associated UBQLN2
Source: eLife journal article supplement (doi:10.7554/elife.84382), 2023-04-11
Supplement: fig4-data1 [file Figure 4D_source data_1.xlsx]

## Sheet: female-1
lifespan	4XALS-shUnc5	4XALS-shLuci	Elav-shUnc5	Elav-shLuci
0	100	100	100	100
1	99.2308	96.7391	100	100
2	98.4615	93.4783	100	100
3	95.3846	93.4783	100	100
4	94.6154	93.4783	100	100
5	94.6154	93.4783	100	97.7011
6	93.0769	92.3913	98.7805	97.7011
7	93.0769	92.3913	97.561	97.7011
8	90.7692	91.3043	97.561	97.7011
9	89.2308	90.2174	96.3415	97.7011
10	86.9231	85.3261	96.3415	97.7011
11	83.8462	78.8043	95.122	96.5517
12	83.0769	77.1739	93.9024	94.2529
13	81.5385	70.6522	93.9024	89.6552
14	75.3846	60.3261	93.9024	89.6552
15	72.3077	58.1522	93.9024	87.3563
16	70.7692	45.1087	93.9024	82.7586
17	65.3846	44.0217	91.4634	81.6092
18	58.4615	40.2174	91.4634	81.6092
19	55.3846	38.0435	89.0244	80.4598
20	52.3077	34.2391	76.8293	80.4598
21	49.2308	31.5217	73.1707	80.4598
22	46.1538	28.8043	65.8537	79.3103
23	43.8462	23.913	63.4146	75.8621
24	42.3077	21.1957	63.4146	73.5632
25	39.2308	20.1087	63.4146	71.2644
26	36.1538	16.8478	60.9756	70.1149
27	34.6154	10.8696	59.7561	68.9655
28	32.3077	9.23913	53.6585	65.5172
29	30.7692	4.34783	46.3415	60.9195
30	24.6154	4.34783	46.3415	58.6207
31	22.3077	4.34783	39.0244	58.6207
32	18.4615	4.34783	36.5854	54.023
33	16.1538	3.80435	35.3659	51.7241
34	15.3846	2.71739	35.3659	48.2759
35	15.3846	2.71739	35.3659	47.1264
36	13.0769	2.71739	30.4878	47.1264
37	13.0769	1.63043	29.2683	43.6782
38	12.3077	1.63043	29.2683	42.5287
39	10.7692	1.63043	29.2683	37.931
40	10.7692	1.63043	29.2683	31.0345
41	10.7692	1.63043	28.0488	31.0345
42	9.23077	0	23.1707	27.5862
43	7.69231	0	23.1707	24.1379
44	4.61538	0	19.5122	20.6897
45	3.07692	0	19.5122	17.2414
46	0	0	17.0732	11.4943
47	0	0	15.8537	11.4943
48			14.6341	10.3448
49			12.1951	9.1954
50			12.1951	9.1954
51			12.1951	6.89655
52			9.7561	5.74713
53			9.7561	3.44828
54			9.7561	3.44828
55			7.31707	3.44828
56			3.65854	2.29885
57			3.65854	2.29885
58			3.65854	0
59			1.21951	0
60			0	0

## Sheet: male-1
lifespan	4XALS-shUnc5	4XALS-shLuci	Elav-shUnc5	Elav-shLuci
1	100	99.2647	100	100
2	100	97.0588	100	100
3	98.7013	94.8529	100	100
4	98.7013	93.3824	100	100
5	98.7013	93.3824	100	96.6102
6	98.7013	90.4412	98.7342	94.9153
7	97.4026	88.9706	98.7342	91.5254
8	93.5065	80.1471	98.7342	91.5254
9	87.013	72.7941	97.4684	91.5254
10	87.013	66.9118	97.4684	91.5254
11	81.8182	60.2941	97.4684	91.5254
12	79.2208	58.0882	96.2025	86.4407
13	79.2208	55.8824	94.9367	79.661
14	79.2208	52.2059	93.6709	79.661
15	75.3247	45.5882	88.6076	61.0169
16	71.4286	41.9118	86.0759	54.2373
17	66.2338	39.7059	84.8101	52.5424
18	62.3377	38.2353	79.7468	50.8475
19	59.7403	31.6176	74.6835	42.3729
20	54.5455	28.6765	65.8228	28.8136
21	51.9481	27.9412	58.2278	22.0339
22	46.7532	25.7353	58.2278	22.0339
23	44.1558	22.7941	56.962	15.2542
24	33.7662	19.1176	54.4304	8.47458
25	25.974	16.9118	48.1013	3.38983
26	20.7792	12.5	41.7722	3.38983
27	18.1818	11.0294	41.7722	3.38983
28	15.5844	8.82353	41.7722	3.38983
29	15.5844	8.82353	41.7722	3.38983
30	15.5844	8.08824	39.2405	3.38983
31	6.49351	5.14706	34.1772	3.38983
32	0	0.735294	27.8481	3.38983
33	0	0.735294	18.9873	3.38983
34	0	0.735294	10.1266	3.38983
35	0	0.735294	2.53165	3.38983
36	0	0	2.53165	3.38983
37	0	0	2.53165	3.38983
38	0	0	2.53165	3.38983
39	0	0	2.53165	3.38983
40	0	0	2.53165	3.38983
41	0	0	2.53165	3.38983
42	0	0	2.53165	3.38983
43	0		2.53165	3.38983
44			2.53165	3.38983
45			2.53165	3.38983
46			2.53165	3.38983
47			2.53165	3.38983
48			2.53165	3.38983
49			2.53165	3.38983
50			2.53165	3.38983
51			2.53165	0
52			2.53165	0
53			2.53165	0
54			2.53165	0
55			2.53165	0
56			2.53165	0
57			1.26582	0
58			0	0
59			0	0
60			0	0
