# Supplementary material for: Axon guidance genes modulate neurotoxicity of ALS-associated UBQLN2
Source: eLife journal article supplement (doi:10.7554/elife.84382), 2023-04-11
Supplement: fig4-data1 [file Figure 4D_source data_2.xlsx]

## Sheet: P4X 27C female
		elav>P4X	elav>P4X
birth date	death date	unc5i	luci
2021-11-09	1931-11-01
2021-11-09	1931-11-01
2021-11-04	1931-11-01
2021-11-08	1931-11-01
2021-11-04	1931-11-01
2021-11-04	1931-11-01
2021-11-04	1931-11-01		3
2021-10-24	1931-11-01
2021-10-27	1931-11-01
2021-10-25	1931-11-01
2021-10-27	1931-11-01
2021-10-27	1931-11-01
2021-10-27	1931-11-01
2021-10-25	1931-11-01
2021-09-29	2021-10-02
2021-10-02	2021-10-03		3
2021-10-03	2021-10-04
2021-10-04	2021-10-05	1
2021-10-03	2021-10-05
2021-09-29	2021-10-06
2021-10-04	2021-10-07	1
2021-10-03	2021-10-07
2021-10-04	2021-10-10	1
2021-10-04	2021-10-11
2021-10-11	2021-10-13	1
2021-10-02	2021-10-13		1
2021-10-11	2021-10-14	1
2021-10-04	2021-10-14	1
2021-10-11	2021-10-14	1
2021-10-03	2021-10-14
2021-10-04	2021-10-16	1
2021-10-03	2021-10-16
2021-10-14	2021-10-17	1
2021-10-03	2021-10-17
2021-10-14	2021-10-18	1
2021-10-04	2021-10-18	2
2021-10-04	2021-10-18
2021-10-04	2021-10-18
2021-10-03	2021-10-18
2021-10-04	2021-10-19	1
2021-10-14	2021-10-19
2021-10-04	2021-10-19
2021-10-03	2021-10-19
2021-10-14	2021-10-20	1
2021-10-04	2021-10-20	2
2021-10-14	2021-10-20		1
2021-10-14	2021-10-20
2021-10-04	2021-10-20
2021-10-03	2021-10-20
2021-10-04	2021-10-21	1
2021-10-04	2021-10-21
2021-10-04	2021-10-21
2021-10-03	2021-10-21
2021-10-03	2021-10-21		4
2021-10-14	2021-10-22	1
2021-10-11	2021-10-22	1
2021-10-04	2021-10-22
2021-10-03	2021-10-22		1
2021-10-02	2021-10-22		1
2021-10-04	2021-10-22		1
2021-10-02	2021-10-22		1
2021-10-04	2021-10-23		1
2021-10-02	2021-10-23		1
2021-10-04	2021-10-23
2021-10-04	2021-10-23
2021-10-04	2021-10-23
2021-10-04	2021-10-23
2021-10-04	2021-10-24		1
2021-10-02	2021-10-24		1
2021-10-14	2021-10-24		1
2021-10-04	2021-10-24
2021-10-03	2021-10-24
2021-10-14	2021-10-25	1
2021-10-11	2021-10-25	3
2021-10-11	2021-10-25		7
2021-10-04	2021-10-25		1
2021-10-03	2021-10-25
2021-10-04	2021-10-26
2021-10-04	2021-10-26		1
2021-10-14	2021-10-26		1
2021-10-14	2021-10-26
2021-10-04	2021-10-26
2021-10-04	2021-10-26
2021-10-04	2021-10-26
2021-10-04	2021-10-27		1
2021-10-14	2021-10-27		1
2021-10-14	2021-10-27
2021-10-04	2021-10-27
2021-10-04	2021-10-27
2021-10-04	2021-10-27
2021-10-02	2021-10-28		1
2021-10-14	2021-10-28		1
2021-09-29	2021-10-28
2021-10-04	2021-10-28
2021-10-14	2021-10-29	1
2021-10-04	2021-10-29		1
2021-10-14	2021-10-29		3
2021-10-02	2021-10-29		2
2021-10-03	2021-10-29
2021-10-03	2021-10-29		1
2021-10-04	2021-10-29
2021-10-02	2021-10-30
2021-10-04	2021-10-30
2021-09-29	2021-10-30
2021-10-04	2021-10-30		1
2021-10-04	2021-10-30	1
2021-10-03	2021-10-30		4
2021-10-02	2021-10-31
2021-10-04	2021-10-31
2021-10-04	2021-10-31
2021-10-14	2021-10-31	1
2021-10-14	2021-10-31
2021-10-04	2021-10-31		2
2021-10-02	2021-10-31		3
2021-10-04	2021-10-31
2021-10-04	2021-10-31	2
2021-10-03	2021-10-31		3
2021-10-18	2021-10-31	1
2021-10-02	2021-11-01
2021-09-29	2021-11-01
2021-10-14	2021-11-01	1
2021-10-02	2021-11-02
2021-10-04	2021-11-02
2021-10-04	2021-11-02		1
2021-10-14	2021-11-02	1
2021-10-04	2021-11-02
2021-10-04	2021-11-02		2
2021-10-04	2021-11-02		2
2021-10-04	2021-11-02
2021-10-04	2021-11-02	1
2021-10-25	2021-11-02	1
2021-10-25	2021-11-02
2021-10-16	2021-11-02	1
2021-10-27	2021-11-02
2021-10-10	2021-11-02		4
2021-10-18	2021-11-02	1
2021-10-02	2021-11-03
2021-10-14	2021-11-03		2
2021-10-14	2021-11-03	3
2021-10-04	2021-11-03
2021-10-03	2021-11-03
2021-10-16	2021-11-03		1
2021-10-14	2021-11-04	1
2021-10-14	2021-11-04		2
2021-10-14	2021-11-04	3
2021-10-04	2021-11-04
2021-10-04	2021-11-04
2021-10-03	2021-11-04
2021-10-29	2021-11-04
2021-10-29	2021-11-05
2021-10-02	2021-11-05
2021-09-29	2021-11-05
2021-10-14	2021-11-05		2
2021-10-14	2021-11-05	1
2021-10-25	2021-11-05
2021-10-16	2021-11-05		1
2021-10-25	2021-11-05
2021-10-04	2021-11-05
2021-10-04	2021-11-06		1
2021-10-04	2021-11-06
2021-10-27	2021-11-06
2021-10-04	2021-11-07		2
2021-10-04	2021-11-07	1
2021-10-27	2021-11-07
2021-10-25	2021-11-07
2021-10-04	2021-11-08
2021-11-04	2021-11-08
2021-10-27	2021-11-08
2021-10-27	2021-11-08
2021-10-27	2021-11-09
2021-10-21	2021-11-09	1
2021-10-25	2021-11-09
2021-11-08	2021-11-09
2021-10-25	2021-11-10
2021-10-04	2021-11-10
2021-10-14	2021-11-10		1
2021-10-14	2021-11-10
2021-11-04	2021-11-10		1
2021-11-04	2021-11-10
2021-11-08	2021-11-10		3
2021-10-25	2021-11-11
2021-10-14	2021-11-11	2
2021-10-25	2021-11-11
2021-10-04	2021-11-11
2021-10-03	2021-11-11
2021-10-14	2021-11-11
2021-11-04	2021-11-11
2021-11-04	2021-11-12		2
2021-11-04	2021-11-13		2
2021-10-25	2021-11-13
2021-10-14	2021-11-13	1
2021-10-04	2021-11-13
2021-11-16	2021-11-13
2021-11-04	2021-11-14		2
2021-11-04	2021-11-14
2021-11-04	2021-11-14	2
2021-11-04	2021-11-14
2021-11-04	2021-11-14		3
2021-11-04	2021-11-14
2021-10-25	2021-11-14
2021-10-29	2021-11-14
2021-10-14	2021-11-14	3
2021-10-27	2021-11-14
2021-10-25	2021-11-14
2021-10-04	2021-11-14
2021-10-27	2021-11-14
2021-10-16	2021-11-14	1
2021-11-16	2021-11-14
2021-11-04	2021-11-15
2021-11-04	2021-11-15		4
2021-11-04	2021-11-15
2021-11-04	2021-11-15	2
2021-11-04	2021-11-15
2021-11-04	2021-11-15		3
2021-11-04	2021-11-15
2021-11-08	2021-11-15		`
2021-11-09	2021-11-15
2021-10-25	2021-11-15
2021-10-25	2021-11-15
2021-10-29	2021-11-15
2021-10-25	2021-11-15
2021-10-27	2021-11-15
2021-10-14	2021-11-15	4
2021-10-27	2021-11-15
2021-10-25	2021-11-15
2021-10-04	2021-11-15
2021-10-27	2021-11-15
2021-10-29	2021-11-15
2021-10-16	2021-11-15	1
2021-10-18	2021-11-15	1
2021-11-16	2021-11-15
2021-11-04	2021-11-16
2021-11-09	2021-11-16
2021-11-04	2021-11-16
2021-10-25	2021-11-16
2021-10-21	2021-11-16	1
2021-10-11	2021-11-16	2
2021-11-04	2021-11-16
2021-10-25	2021-11-16
2021-10-27	2021-11-16
2021-10-27	2021-11-16
2021-11-04	2021-11-17
2021-10-29	2021-11-17
2021-10-25	2021-11-17
2021-11-04	2021-11-17
2021-11-09	2021-11-17	1
2021-11-04	2021-11-17	1
2021-11-04	2021-11-18
2021-11-04	2021-11-18
2021-10-29	2021-11-18
2021-11-16	2021-11-18
2021-11-08	2021-11-18		1
2021-11-04	2021-11-18		1
2021-11-08	2021-11-18		2
2021-11-09	2021-11-18	2
2021-11-04	2021-11-18	1
2021-11-04	2021-11-18
2021-10-29	2021-11-18
2021-10-27	2021-11-18
2021-10-27	2021-11-18
2021-11-04	2021-11-18	2
2021-11-09	2021-11-19
2021-11-04	2021-11-19
2021-11-08	2021-11-19
2021-11-04	2021-11-19
2021-10-25	2021-11-19
2021-11-04	2021-11-19		1
2021-11-08	2021-11-19		4
2021-11-04	2021-11-19	1
2021-10-27	2021-11-19
2021-11-04	2021-11-20
2021-11-04	2021-11-20
2021-11-04	2021-11-20
2021-11-04	2021-11-20
2021-10-29	2021-11-20
2021-10-25	2021-11-20
2021-11-08	2021-11-20		1
2021-11-04	2021-11-20		1
2021-11-04	2021-11-21
2021-11-04	2021-11-21
2021-10-25	2021-11-21
2021-11-08	2021-11-21		11
2021-11-04	2021-11-21		2
2021-11-04	2021-11-21	3
2021-11-04	2021-11-21
2021-11-04	2021-11-21
2021-11-04	2021-11-22
2021-11-04	2021-11-22
2021-11-08	2021-11-22
2021-11-04	2021-11-22
2021-11-04	2021-11-22
2021-10-29	2021-11-22
2021-10-25	2021-11-22
2021-11-08	2021-11-22		10
2021-10-29	2021-11-22		2
2021-11-04	2021-11-22	3
2021-10-21	2021-11-22	1
2021-11-04	2021-11-22	5
2021-10-14	2021-11-22	1
2021-11-04	2021-11-22
2021-10-29	2021-11-22
2021-10-25	2021-11-22
2021-10-27	2021-11-22
2021-10-16	2021-11-22
2021-10-11	2021-11-22		3
2021-10-16	2021-11-22		2
2021-11-04	2021-11-23
2021-11-04	2021-11-23
2021-11-04	2021-11-23
2021-11-08	2021-11-23
2021-11-04	2021-11-23
2021-11-04	2021-11-23
2021-10-25	2021-11-23
2021-10-25	2021-11-23
2021-11-04	2021-11-23	2
2021-10-24	2021-11-23	6
2021-10-11	2021-11-23	1
2021-11-04	2021-11-23
2021-11-04	2021-11-23
2021-10-29	2021-11-23
2021-10-25	2021-11-23
2021-10-27	2021-11-23
2021-10-11	2021-11-23	1
2021-11-16	2021-11-24
2021-11-04	2021-11-24
2021-11-09	2021-11-24
2021-11-08	2021-11-24
2021-11-04	2021-11-24
2021-10-25	2021-11-24
2021-11-08	2021-11-24		15
2021-11-08	2021-11-24		8
2021-11-12	2021-11-24		1
2021-11-04	2021-11-24	1
2021-11-04	2021-11-26	1
2021-11-09	2021-11-26	1
2021-11-04	2021-11-26
2021-11-04	2021-11-26
2021-11-04	2021-11-26
2021-11-04	2021-11-26
2021-10-25	2021-11-26
2021-11-16	2021-11-26
2021-11-04	2021-11-26		1
2021-11-08	2021-11-26		1
2021-10-25	2021-11-26
2021-10-21	2021-11-26	1
2021-10-24	2021-11-26	3
2021-11-04	2021-11-26
2021-11-04	2021-11-27
2021-11-09	2021-11-27
2021-11-04	2021-11-27
2021-11-08	2021-11-27
2021-11-04	2021-11-27
2021-11-04	2021-11-27
2021-10-25	2021-11-27
2021-11-16	2021-11-27
2021-10-25	2021-11-27
2021-11-04	2021-11-27		4
2021-11-08	2021-11-27		2
2021-11-25	2021-11-27
2021-10-14	2021-11-27	4
2021-11-04	2021-11-27
2021-10-25	2021-11-27
2021-11-04	2021-11-28
2021-11-09	2021-11-28
2021-11-09	2021-11-28
2021-11-04	2021-11-28
2021-11-04	2021-11-28
2021-11-04	2021-11-28
2021-11-16	2021-11-28
2021-10-25	2021-11-28
2021-11-08	2021-11-28		1
2021-10-21	2021-11-28	1
2021-11-04	2021-11-28	2
2021-10-14	2021-11-28	2
2021-11-09	2021-11-28
2021-10-29	2021-11-28
2021-10-29	2021-11-28
2021-10-27	2021-11-28
2021-11-04	2021-11-29
2021-11-04	2021-11-29
2021-11-04	2021-11-29
2021-11-16	2021-11-29
2021-11-08	2021-11-29		1
2021-10-25	2021-11-29
2021-11-04	2021-11-29	1
2021-10-21	2021-11-29	1
2021-11-04	2021-11-29	2
2021-10-14	2021-11-29	4
2021-11-04	2021-11-29
2021-11-09	2021-11-29
2021-10-29	2021-11-29
2021-10-29	2021-11-29
2021-10-27	2021-11-29
2021-11-09	2021-12-01
2021-11-09	2021-12-01
2021-11-09	2021-12-01
2021-11-04	2021-12-01
2021-11-04	2021-12-01
2021-11-16	2021-12-01
2021-11-04	2021-12-01		2
2021-11-09	2021-12-01	2
2021-11-04	2021-12-01
2021-10-24	2021-12-01
2021-10-27	2021-12-01
2021-10-25	2021-12-01
2021-10-27	2021-12-01
2021-10-27	2021-12-01
2021-10-27	2021-12-01
2021-10-25	2021-12-01
2021-11-04	2021-12-02
2021-11-09	2021-12-02
2021-11-09	2021-12-02
2021-11-16	2021-12-02
2021-11-08	2021-12-02		1
2021-11-09	2021-12-02	3
2021-10-21	2021-12-02	2
2021-11-04	2021-12-02
2021-10-29	2021-12-02
2021-10-27	2021-12-02
2021-10-29	2021-12-02
2021-10-25	2021-12-02
2021-10-27	2021-12-02
2021-10-27	2021-12-02
2021-10-25	2021-12-02
2021-11-04	2021-12-05
2021-11-09	2021-12-05
2021-11-04	2021-12-05
2021-11-04	2021-12-05
2021-11-04	2021-12-05
2021-11-16	2021-12-05
2021-10-25	2021-12-05
2021-10-29	2021-12-05
2021-10-27	2021-12-05
2021-10-27	2021-12-05
2021-10-25	2021-12-05
2021-11-04	2021-12-06
2021-11-04	2021-12-06
2021-11-09	2021-12-06
2021-11-09	2021-12-06
2021-11-09	2021-12-06
2021-11-04	2021-12-06
2021-11-08	2021-12-06
2021-11-04	2021-12-06
2021-11-04	2021-12-06
2021-11-16	2021-12-06
2021-10-25	2021-12-06
2021-11-12	2021-12-06
2021-11-12	2021-12-06		2
2021-10-29	2021-12-06
2021-10-27	2021-12-06
2021-10-27	2021-12-06
2021-10-25	2021-12-06
2021-11-09	2021-12-07
2021-11-08	2021-12-07
2021-11-04	2021-12-07
2021-11-08	2021-12-07		1
2021-11-12	2021-12-07		1
2021-11-12	2021-12-07	1
2021-10-29	2021-12-07
2021-10-27	2021-12-07
2021-11-04	2021-12-08
2021-11-09	2021-12-08
2021-11-09	2021-12-08
2021-11-04	2021-12-08
2021-11-12	2021-12-08	2
2021-10-29	2021-12-08
2021-10-29	2021-12-08
2021-10-27	2021-12-08
2021-10-25	2021-12-08
2021-11-04	2021-12-09
2021-11-08	2021-12-09
2021-11-04	2021-12-09
2021-11-16	2021-12-09
2021-10-29	2021-12-09
2021-11-04	2021-12-10
2021-11-09	2021-12-10
2021-11-08	2021-12-10
2021-11-04	2021-12-10
2021-10-29	2021-12-10
2021-10-29	2021-12-10
2021-10-27	2021-12-10
2021-10-25	2021-12-10
2021-10-27	2021-12-13
2021-11-16	2021-12-14
2021-12-10	2021-12-15
2021-10-29	2021-12-15
2021-11-09	2021-12-15
2021-11-16	2021-12-15
2021-11-16	2021-12-16
2021-11-16	2021-12-16
2021-11-09	2021-12-17
2021-11-16	2021-12-17
2021-11-16	2021-12-17
2021-11-16	2021-12-18
2021-10-29	2021-12-19
2021-11-09	2021-12-19
2021-11-16	2021-12-19
2021-10-29	2021-12-20
2021-11-16	2021-12-20
2021-11-04	2022-11-30
	SUM	130	178

## Sheet: P4X 27C male
		elav>P4X	elav>P4X
birth date	death date	unc5i	luci
2021-10-03	2022-10-04
2021-10-04	2021-10-05		1
2021-10-03	2021-10-05
2021-10-03	2021-10-05
2021-10-03	2021-10-06	1
2021-10-03	2021-10-06		1
2021-10-04	2021-10-06		2
2021-10-02	2021-10-06
2021-10-04	2021-10-07		1
2021-10-03	2021-10-07
2021-10-02	2021-10-08
2021-10-03	2021-10-08
2021-10-03	2021-10-09
2021-10-04	2021-10-09
2021-10-03	2021-10-09
2021-10-03	2021-10-10		2
2021-10-04	2021-10-10
2021-10-04	2021-10-11
2021-10-03	2021-10-12	1
2021-10-04	2021-10-12
2021-10-04	2021-10-13		1
2021-10-02	2021-10-13
2021-10-04	2021-10-13
2021-10-03	2021-10-13
2021-10-03	2021-10-14		1
2021-10-02	2021-10-14
2021-10-04	2021-10-14
2021-10-03	2021-10-14
2021-10-03	2021-10-15	1
2021-10-03	2021-10-15		1
2021-10-04	2021-10-15
2021-10-04	2021-10-16		1
2021-10-14	2021-10-16		1
2021-10-02	2021-10-16
2021-10-04	2021-10-16
2021-10-03	2021-10-16
2021-10-03	2021-10-17		2
2021-10-14	2021-10-17		1
2021-10-03	2021-10-18		1
2021-10-14	2021-10-18		1
2021-10-02	2021-10-18
2021-10-03	2021-10-18
2021-10-04	2021-10-18
2021-10-03	2021-10-19
2021-10-09	2021-10-19
2021-10-09	2021-10-20
2021-10-14	2021-10-21
2021-10-03	2021-10-21
2021-10-03	2021-10-22	1
2021-10-03	2021-10-22		6
2021-10-14	2021-10-22		4
2021-10-04	2021-10-22
2021-10-16	2021-10-23	1
2021-10-04	2021-10-23
2021-10-16	2021-10-24	1
2021-10-14	2021-10-24		1
2021-10-16	2021-10-25	1
2021-10-16	2021-10-25		1
2021-10-04	2021-10-25
2021-10-03	2021-10-25	1
2021-10-03	2021-10-26	1
2021-10-18	2021-10-26	1
2021-10-14	2021-10-26		1
2021-10-03	2021-10-27	2
2021-10-11	2021-10-27	1
2021-10-16	2021-10-27	1
2021-10-18	2021-10-27	1
2021-10-14	2021-10-27		1
2021-10-03	2021-10-27
2021-10-03	2021-10-27		1
2021-10-03	2021-10-28
2021-10-04	2021-10-28
2021-10-02	2021-10-28
2021-10-14	2021-10-29	1
2021-10-16	2021-10-29		2
2021-10-04	2021-10-29
2021-10-02	2021-10-29
2021-10-04	2021-10-29
2021-10-04	2021-10-30
2021-10-14	2021-10-30		2
2021-10-27	2021-10-30
2021-10-11	2021-10-30	1
2021-10-04	2021-10-31
2021-10-04	2021-10-31
2021-10-03	2021-10-31
2021-10-14	2021-10-31		1
2021-10-11	2021-10-31	2
2021-10-04	2021-11-01
2021-10-25	2021-11-01
2021-10-04	2021-11-02
2021-10-27	2021-11-02
2021-10-29	2021-11-02		1
2021-10-14	2021-11-02		3
2021-10-16	2021-11-02		2
2021-10-11	2021-11-02	1
2021-10-04	2021-11-03
2021-10-21	2021-11-03
2021-10-25	2021-11-03
2021-10-25	2021-11-03
2021-10-09	2021-11-03
2021-10-14	2021-11-03		2
2021-10-14	2021-11-03	1
2021-10-25	2021-11-03
2021-10-03	2021-11-03	3
2021-10-04	2021-11-04
2021-10-04	2021-11-04
2021-10-29	2021-11-04		1
2021-10-14	2021-11-04		1
2021-10-14	2021-11-04	1
2021-10-25	2021-11-04
2021-10-03	2021-11-04	3
2021-10-08	2021-11-04	1
2021-11-04	2021-11-04	2
2021-10-14	2021-11-05	1
2021-10-04	2021-11-05
2021-10-14	2021-11-05		1
2021-11-04	2021-11-05
2021-11-04	2021-11-05
2021-10-16	2021-11-06	1
2021-10-25	2021-11-06
2021-10-14	2021-11-06		2
2021-10-14	2021-11-06
2021-10-27	2021-11-06
2021-10-27	2021-11-06
2021-10-04	2021-11-06
2021-10-29	2021-11-06		1
2021-10-21	2021-11-06
2021-10-14	2021-11-06		2
2021-10-25	2021-11-06
2021-10-16	2021-11-07	1
2021-10-27	2021-11-07
2021-10-14	2021-11-07		1
2021-10-14	2021-11-07	3
2021-10-04	2021-11-07
2021-10-29	2021-11-07		1
2021-10-04	2021-11-07
2021-10-14	2021-11-07		3
2021-10-25	2021-11-07
2021-10-25	2021-11-07
2021-10-16	2021-11-08	1
2021-10-25	2021-11-08
2021-10-14	2021-11-08	3
2021-10-04	2021-11-08
2021-10-29	2021-11-08		1
2021-10-21	2021-11-08
2021-10-14	2021-11-08		3
2021-10-25	2021-11-08
2021-11-09	2021-11-08		5
2021-10-16	2021-11-09	1
2021-10-27	2021-11-09
2021-10-25	2021-11-09
2021-10-14	2021-11-09		1
2021-10-14	2021-11-09	4
2021-10-27	2021-11-09
2021-10-04	2021-11-09
2021-10-29	2021-11-09		2
2021-10-04	2021-11-09		1
2021-10-14	2021-11-09		5
2021-10-04	2021-11-10
2021-10-25	2021-11-10
2021-10-25	2021-11-10
2021-10-14	2021-11-10		2
2021-10-27	2021-11-10
2021-11-04	2021-11-10
2021-10-04	2021-11-11
2021-10-11	2021-11-11	1
2021-10-14	2021-11-11		3
2021-10-27	2021-11-11
2021-10-25	2021-11-11
2021-10-25	2021-11-12
2021-11-04	2021-11-12		1
2021-11-04	2021-11-13	2
2021-11-08	2021-11-13
2021-11-04	2021-11-13		2
2021-10-27	2021-11-13
2021-10-14	2021-11-13
2021-10-14	2021-11-13		1
2021-10-27	2021-11-13
2021-10-29	2021-11-13
2021-11-14	2021-11-13		4
2021-11-08	2021-11-14
2021-11-08	2021-11-14		2
2021-11-08	2021-11-14		1
2021-11-04	2021-11-14		2
2021-10-27	2021-11-14
2021-10-27	2021-11-14
2021-10-29	2021-11-14
2021-10-14	2021-11-14
2021-10-18	2021-11-14	1
2021-10-14	2021-11-14	2
2021-10-29	2021-11-14
2021-10-25	2021-11-14
2021-10-21	2021-11-14
2021-10-14	2021-11-14		4
2021-11-04	2021-11-15	3
2021-11-08	2021-11-15
2021-11-04	2021-11-15		4
2021-10-27	2021-11-15
2021-10-29	2021-11-15
2021-10-14	2021-11-15
2021-10-18	2021-11-15	1
2021-10-14	2021-11-15	2
2021-10-25	2021-11-15
2021-10-21	2021-11-15
2021-10-14	2021-11-15		6
2021-11-04	2021-11-16	1
2021-11-08	2021-11-16		3
2021-10-29	2021-11-16
2021-10-29	2021-11-16
2021-11-09	2021-11-17		3
2021-11-08	2021-11-17		5
2021-11-04	2021-11-17
2021-10-27	2021-11-17
2021-10-21	2021-11-18	1
2021-11-08	2021-11-18		4
2021-10-27	2021-11-18
2021-11-16	2021-11-18
2021-10-29	2021-11-18
2021-11-04	2021-11-18
2021-10-29	2021-11-18
2021-10-07	2021-11-18
2021-10-27	2021-11-18
2021-11-09	2021-11-19
2021-11-04	2021-11-19	2
2021-11-04	2021-11-19		1
2021-11-08	2021-11-19		2
2021-10-27	2021-11-19
2021-11-16	2021-11-19
2021-11-04	2021-11-19
2021-10-29	2021-11-19
2021-10-27	2021-11-19
2021-10-29	2021-11-19
2021-11-04	2021-11-20	2
2021-11-12	2021-11-20	1
2021-11-04	2021-11-20		1
2021-11-09	2021-11-20
2021-10-27	2021-11-20
2021-11-04	2021-11-20
2021-11-04	2021-11-20
2021-10-29	2021-11-20
2021-10-27	2021-11-20
2021-10-29	2021-11-20
2021-10-21	2021-11-21	1
2021-11-09	2021-11-21
2021-11-04	2021-11-21	2
2021-11-04	2021-11-21
2021-11-04	2021-11-21
2021-11-04	2021-11-21
2021-10-29	2021-11-21
2021-11-04	2021-11-22
2021-11-09	2021-11-22
2021-11-04	2021-11-22	3
2021-11-08	2021-11-22		2
2021-11-04	2021-11-22
2021-11-04	2021-11-22
2021-10-27	2021-11-22
2021-11-09	2021-11-22
2021-11-04	2021-11-22
2021-11-04	2021-11-22
2021-10-29	2021-11-22
2021-10-29	2021-11-22
2021-10-27	2021-11-22
2021-11-04	2021-11-23
2021-11-09	2021-11-23
2021-11-08	2021-11-23		1
2021-11-08	2021-11-23		5
2021-11-08	2021-11-23
2021-11-04	2021-11-23
2021-11-04	2021-11-23
2021-11-09	2021-11-23
2021-10-27	2021-11-23
2021-10-29	2021-11-23
2021-10-29	2021-11-23
2021-10-27	2021-11-23
2021-11-04	2021-11-24
2021-11-09	2021-11-24
2021-11-08	2021-11-24		2
2021-11-04	2021-11-24	1
2021-11-04	2021-11-26
2021-11-09	2021-11-26
2021-11-12	2021-11-26		1
2021-11-08	2021-11-26		2
2021-11-16	2021-11-26
2021-11-09	2021-11-26
2021-11-09	2021-11-26
2021-10-29	2021-11-26
2021-11-04	2021-11-26
2021-10-27	2021-11-26
2021-10-27	2021-11-26
2021-11-04	2021-11-27
2021-11-04	2021-11-27
2021-11-09	2021-11-27
2021-11-12	2021-11-27		1
2021-11-09	2021-11-27
2021-10-27	2021-11-27
2021-10-27	2021-11-27
2021-11-04	2021-11-28
2021-11-04	2021-11-28
2021-11-04	2021-11-28
2021-11-04	2021-11-28
2021-11-09	2021-11-28
2021-11-04	2021-11-28	2
2021-11-08	2021-11-28		2
2021-11-16	2021-11-28
2021-11-09	2021-11-28
2021-11-09	2021-11-28
2021-11-04	2021-11-28
2021-11-04	2021-11-29
2021-11-04	2021-11-29
2021-11-04	2021-11-29
2021-11-04	2021-11-29
2021-11-09	2021-11-29
2021-11-04	2021-11-29
2021-11-04	2021-11-29
2021-11-12	2021-11-29	2
2021-11-04	2021-11-29	3
2021-11-16	2021-11-29
2021-11-09	2021-11-29
2021-11-04	2021-11-29
2021-10-27	2021-11-29
2021-10-29	2021-11-29
2021-10-27	2021-11-29
2021-10-29	2021-11-29
2021-10-27	2021-11-29
2021-10-29	2021-11-29
2021-11-09	2021-11-29
2021-10-29	2021-11-29
2021-11-04	2021-11-30
2021-11-04	2021-11-30
2021-11-09	2021-11-30
2021-11-04	2021-11-30
2021-11-08	2021-11-30		2
2021-11-08	2021-11-30
2021-11-04	2021-11-30
2021-11-04	2021-12-01
2021-11-04	2021-12-01
2021-11-04	2021-12-01
2021-11-08	2021-12-01
2021-11-04	2021-12-01
2021-11-04	2021-12-02
2021-11-04	2021-12-02
2021-11-09	2021-12-02
2021-11-04	2021-12-02
2021-11-08	2021-12-02
2021-11-04	2021-12-02
2021-11-04	2021-12-03
2021-11-04	2021-12-03
2021-11-04	2021-12-03
2021-11-04	2021-12-05
2021-11-04	2021-12-05
2021-11-08	2021-12-05
2021-11-04	2021-12-05
2021-11-04	2021-12-05
2021-11-04	2021-12-06
2021-11-04	2021-12-06
2021-11-09	2021-12-06
2021-11-16	2021-12-06
2021-11-04	2021-12-06
2021-11-04	2021-12-06
2021-10-29	2021-12-06
2021-11-09	2021-12-07
2021-11-08	2021-12-07
2021-11-04	2021-12-07
2021-11-04	2021-12-08
2021-11-09	2021-12-08
2021-11-09	2021-12-08
2021-11-08	2021-12-08
2021-11-09	2021-12-09
2021-11-08	2021-12-09
2021-11-16	2021-12-09
2021-11-04	2021-12-10
2021-11-09	2021-12-10
2021-11-08	2021-12-10
2021-11-04	2021-12-13
2021-10-29	2021-12-15
2021-11-04	2021-12-17
2021-11-04	2021-12-18
2021-11-09	2021-12-19
2021-11-04	2021-12-19
2021-11-09	2021-12-20
2021-10-09	2022-11-01
	SUM	79	145

## Sheet: G28 27C male
		elav>G28	elav>G28
birth date	death date	unc5i	luci
2021-11-08	1931-11-01		2
2021-11-16	1931-11-01		2
2021-11-02	2021-10-16	1
2021-10-14	2021-10-23	1
2021-10-14	2021-10-28	1
2021-10-11	2021-10-29	1
2021-10-14	2021-10-29	3
2021-10-16	2021-10-29	1
2021-10-18	2021-10-30	1
2021-10-11	2021-10-31	1
2021-10-14	2021-10-31	1
2021-10-14	2021-11-02	1
2021-10-21	2021-11-02		1
2021-10-27	2021-11-02
2021-10-14	2021-11-03	3
2021-10-14	2021-11-04	3
2021-10-11	2021-11-04	1
2021-10-16	2021-11-04		2
2021-10-18	2021-11-04		1
2021-10-11	2021-11-05	1
2021-10-18	2021-11-05	2
2021-10-11	2021-11-05	1
2021-10-16	2021-11-05		2
2021-10-11	2021-11-06	2
2021-10-14	2021-11-06	1
2021-10-06	2021-11-06	1
2021-10-25	2021-11-06
2021-10-14	2021-11-07	1
2021-10-06	2021-11-07	2
2021-10-25	2021-11-07
2021-10-14	2021-11-08	3
2021-10-06	2021-11-08	2
2021-10-06	2021-11-08	2
2021-10-25	2021-11-08
2021-10-14	2021-11-09	1
2021-10-06	2021-11-09	1
2021-10-06	2021-11-09	2
2021-10-14	2021-11-09	1
2021-10-25	2021-11-09
2021-10-11	2021-11-10	1
2021-10-11	2021-11-10	1
2021-10-11	2021-11-11	1
2021-10-16	2021-11-11	1
2021-10-11	2021-11-11	2
2021-10-25	2021-11-11
2021-10-11	2021-11-12	3
2021-10-11	2021-11-13	3
2021-10-11	2021-11-14	4
2021-11-08	2021-11-14	1
2021-10-21	2021-11-14
2021-10-27	2021-11-14
2021-11-08	2021-11-14		1
2021-10-11	2021-11-15	5
2021-10-27	2021-11-15
2021-11-08	2021-11-15		1
2021-10-25	2021-11-18
2021-10-27	2021-11-18
2021-10-14	2021-11-18	1
2021-11-02	2021-11-18
2021-10-21	2021-11-19
2021-10-25	2021-11-19
2021-11-04	2021-11-19		4
2021-11-02	2021-11-19
2021-10-25	2021-11-20
2021-10-29	2021-11-20
2021-10-21	2021-11-20
2021-11-08	2021-11-20
2021-10-25	2021-11-22
2021-10-29	2021-11-22
2021-11-12	2021-11-22
2021-11-12	2021-11-23
2021-11-08	2021-11-23	1
2021-11-16	2021-11-23		1
2021-11-02	2021-11-23
2021-11-08	2021-11-23		4
2021-10-29	2021-11-23
2021-11-12	2021-11-24
2021-11-08	2021-11-24	2
2021-11-08	2021-11-26		1
2021-11-08	2021-11-26	1
2021-11-08	2021-11-26
2021-11-08	2021-11-26
2021-11-08	2021-11-27		2
2021-11-08	2021-11-27	2
2021-11-02	2021-11-27
2021-11-08	2021-11-27
2021-10-25	2021-11-28
2021-11-08	2021-11-28		3
2021-11-16	2021-11-28		2
2021-11-08	2021-11-28	3
2021-11-02	2021-11-28
2021-11-08	2021-11-28
2021-10-25	2021-11-29
2021-11-08	2021-11-29		4
2021-11-16	2021-11-29		2
2021-11-08	2021-11-29	3
2021-11-08	2021-11-29
2021-11-08	2021-12-01		3
2021-11-16	2021-12-01		1
2021-11-16	2021-12-01		2
2021-11-16	2021-12-01
2021-11-08	2021-12-02		3
2021-11-16	2021-12-02		2
2021-11-16	2021-12-02		2
2021-11-16	2021-12-02
2021-11-16	2021-12-02
2021-11-08	2021-12-03		3
2021-10-25	2021-12-03
2021-11-16	2021-12-05		1
2021-10-16	2021-12-06		2
2021-11-16	2021-12-06
2021-11-16	2021-12-06		1
2021-11-16	2021-12-06		2
2021-10-11	2021-12-07	1
2021-10-11	2021-12-08	1
2021-11-16	2021-12-09
2021-11-16	2021-12-09		1
2021-11-12	2021-12-10
2021-11-16	2021-12-10
2021-11-16	2021-12-10		1
	SUM	79	59

## Sheet: G28 27C female
		elav>G28	elav>G28
birth date	death date	unc5i	luci
2021-11-08	1931-11-01		1
2021-10-25	1931-11-01
2021-10-11	1931-11-01	2
2021-11-16	1931-11-01		2
2021-10-11	2021-10-17	1
2021-10-11	2021-10-18	1
2021-10-11	2021-10-20	1
2021-10-11	2021-10-23		1
2021-10-11	2021-10-26		2
2021-10-14	2021-10-27		1
2021-10-11	2021-10-27		2
2021-10-25	2021-10-27
2021-10-11	2021-10-30	1
2021-10-11	2021-10-31	1
2021-10-11	2021-10-31	3
2021-10-11	2021-10-31	3
2021-10-21	2021-11-02	1
2021-10-11	2021-11-02	4
2021-10-16	2021-11-02	2
2021-10-11	2021-11-03		1
2021-10-25	2021-11-03
2021-10-14	2021-11-05		1
2021-10-14	2021-11-05	2
2021-10-16	2021-11-05	2
2021-10-11	2021-11-05		1
2021-10-11	2021-11-06	1
2021-10-11	2021-11-07	1
2021-10-11	2021-11-08	2
2021-10-11	2021-11-08	2
2021-10-11	2021-11-08		2
2021-10-11	2021-11-09	3
2021-10-11	2021-11-09	2
2021-10-14	2021-11-09		1
2021-10-11	2021-11-09		2
2021-10-16	2021-11-11	1
2021-10-14	2021-11-12	1
2021-10-25	2021-11-13
2021-10-14	2021-11-14	2
2021-10-14	2021-11-15	2
2021-11-08	2021-11-15
2021-10-14	2021-11-15		1
2021-10-16	2021-11-16	2
2021-10-16	2021-11-17		2
2021-10-16	2021-11-18	1
2021-10-25	2021-11-18
2021-10-16	2021-11-18		1
2021-10-14	2021-11-18		1
2021-11-08	2021-11-19	1
2021-10-14	2021-11-19	4
2021-11-08	2021-11-19		1
2021-10-11	2021-11-19		4
2021-10-16	2021-11-19		1
2021-10-14	2021-11-20		1
2021-10-11	2021-11-20		3
2021-11-03	2021-11-22		1
2021-10-16	2021-11-22	1
2021-11-03	2021-11-22	1
2021-10-11	2021-11-22	2
2021-10-25	2021-11-22
2021-10-21	2021-11-22
2021-11-02	2021-11-22
2021-10-11	2021-11-23		1
2021-10-21	2021-11-23
2021-10-11	2021-11-24		1
2021-11-11	2021-11-24		1
2021-10-25	2021-11-24
2021-10-14	2021-11-24	1
2021-10-11	2021-11-26	1
2021-10-25	2021-11-26
2021-10-16	2021-11-27		1
2021-10-11	2021-11-27	1
2021-10-25	2021-11-27
2021-10-16	2021-11-27	2
2021-10-11	2021-11-28	1
2021-10-25	2021-11-28
2021-11-08	2021-11-28	1
2021-11-03	2021-11-28		1
2021-11-16	2021-11-28		1
2021-10-11	2021-11-29		1
2021-10-16	2021-11-29		1
2021-10-11	2021-11-29	2
2021-10-25	2021-11-29
2021-11-08	2021-11-29	1
2021-10-18	2021-11-29		1
2021-10-16	2021-11-29	3
2021-11-16	2021-11-29		1
2021-10-16	2021-12-01		2
2021-11-08	2021-12-01		2
2021-11-12	2021-12-01
2021-11-08	2021-12-01	2
2021-10-16	2021-12-01	1
2021-11-03	2021-12-01		1
2021-10-11	2021-12-02		1
2021-11-08	2021-12-02		2
2021-11-12	2021-12-02
2021-10-11	2021-12-02	2
2021-11-03	2021-12-02		2
2021-11-16	2021-12-02		2
2021-10-11	2021-12-03		1
2021-11-12	2021-12-03
2021-10-18	2021-12-03		1
2021-11-16	2021-12-03		1
2021-11-03	2021-12-05		1
2021-10-11	2021-12-05	2
2021-10-25	2021-12-05
2021-11-08	2021-12-05
2021-11-08	2021-12-05		1
2021-11-03	2021-12-06		1
2021-10-16	2021-12-06		2
2021-10-11	2021-12-06	3
2021-10-25	2021-12-06
2021-11-08	2021-12-06	1
2021-11-08	2021-12-06
2021-10-11	2021-12-06		1
2021-11-03	2021-12-07		2
2021-10-25	2021-12-07
2021-11-12	2021-12-07
2021-11-08	2021-12-08		2
2021-10-11	2021-12-08		2
2021-10-25	2021-12-08
2021-11-12	2021-12-08
2021-10-11	2021-12-09	2
2021-11-08	2021-12-09	2
2021-11-12	2021-12-09
2021-10-11	2021-12-10	1
2021-10-25	2021-12-10
2021-10-21	2021-12-10
2021-11-12	2021-12-10
2021-11-12	2021-12-10
2021-10-18	2021-12-10		1
2021-11-03	2021-12-10		2
2021-10-25	2021-12-12
2021-11-16	2021-12-12
2021-11-12	2021-12-12
2021-10-25	2021-12-13
2021-11-03	2021-12-13		2
2021-11-16	2021-12-13
2021-11-12	2021-12-13
2021-10-21	2021-12-15
2021-10-28	2021-12-15		1
2021-11-16	2021-12-15
2021-11-12	2021-12-15
2021-10-25	2021-12-16
2021-11-08	2021-12-16		1
2021-11-03	2021-12-16		1
2021-10-25	2021-12-17
2021-11-03	2021-12-17		2
2021-10-21	2021-12-18
2021-10-25	2021-12-18
2021-11-08	2021-12-18		1
2021-11-03	2021-12-18		3
2021-10-25	2021-12-19
2021-11-03	2021-12-19		2
2021-11-12	2021-12-19
2021-11-08	2021-12-20		1
2021-11-12	2021-12-20
2021-11-12	2021-12-20
	SUM	82	87
