# Supplementary material for: Axon guidance genes modulate neurotoxicity of ALS-associated UBQLN2
Source: eLife journal article supplement (doi:10.7554/elife.84382), 2023-04-11
Supplement: fig5-data1 [file Figure 5(E,F)-densitometry.xlsx]

## Sheet: Sheet1
1	4XALS
	shmCherry	shLuci	shBeat1-b	shBeat-1c
UBQLN2	6.83	5.59	5.43	5.09
Tubulin	1.52	1.15	1.22	1.34
ratio	4.49342	4.86087	4.45082	3.79851
ratio	1	1.08177	0.990519	0.845349
2	4XALS
	shmCherry	shLuci	shBeat1-b	shBeat-1c
UBQLN2	3.98	3.24	3.06	2.84
Tubulin	3.09	5.22	3.46	3.48
ratio	1.28803	0.62069	0.884393	0.816092
ratio	1	0.481892	0.686627	0.633599
3	4XALS
	shmCherry	shLuci	shBeat1-b	shBeat-1c
UBQLN2	3.05	2.36	2.69	2.93
Tubulin	3.12	3.46	2.57	3.36
ratio	0.977564	0.682081	1.04669	0.872024
ratio	1	0.697735	1.07072	0.892037
	4XALS
	shmCherry	shLuci	shBeat1-b	shBeat-1c
	1	1.08177	0.990519	0.845349
	1	0.481892	0.686627	0.633599
	1	0.697735	1.07072	0.892037
AVE	1	0.753801	0.915954	0.790328
STDE	0	0.175431	0.116981	0.0795176
