# Supplementary material for: Axon guidance genes modulate neurotoxicity of ALS-associated UBQLN2
Source: eLife journal article supplement (doi:10.7554/elife.84382), 2023-04-11
Supplement: fig6-data1 [file Figure 6A solubility.xlsx]

## Sheet: Sheet1
2020-07-11	WT	P497H	2XALS	4XALS				WT	P497H	2XALS	4XALS
Insoluble UBQLN2	0.0263	0.0171	0.0125	0.0127			2020-07-11	0.0316372	0.0269249	0.0188111	0.0296244
Soluble UBQLN2	0.805	0.618	0.652	0.416			2020-08-19	0.020063	0.0401786	0.0109409	0.01215
ratio	0.0316372	0.0269249	0.0188111	0.0296244			2020-08-19	0.0141897	0.0162927	0.0141369	0.00973938
							AVE	0.0219633	0.0277987	0.0146297	0.0171713
							STDE	0.00512565	0.0069093	0.00228532	0.00626553
								WT	P497H	2XALS	4XALS
2020-08-19	WT	P497H	2XALS	4XALS			2020-07-11	3.16372	2.69249	1.88111	2.96244
Insoluble UBQLN2	0.00121	0.00108	0.0005	0.00046			2020-08-19	2.0063	4.01786	1.09409	1.215
Soluble UBQLN2	0.0591	0.0258	0.0452	0.0374			2020-08-19	1.41897	1.62927	1.41369	0.973938
ratio	0.020063	0.0401786	0.0109409	0.01215			AVE	2.19633	2.77987	1.46297	1.71713
							STDE	0.512565	0.69093	0.228532	0.626553
2020-08-19	WT	P497H	2XALS	4XALS
Insoluble UBQLN2	0.00133	0.00106	0.00076	0.000537
Soluble UBQLN2	0.0924	0.064	0.053	0.0546
ratio	0.0141897	0.0162927	0.0141369	0.00973938
