# Supplementary material for: Axon guidance genes modulate neurotoxicity of ALS-associated UBQLN2
Source: eLife journal article supplement (doi:10.7554/elife.84382), 2023-04-11
Supplement: fig6-data1 [file Figure 6D,E-densitometry.xlsx]

## Sheet: Sheet1
3322 3323 3326	Sol
2021-09-02	WT			P497H			4XALS (C1)								WT			P497H			4XALS (C1)
Baf	0h	Baf	B-8	0h	Baf	B-8	0h	Baf	B-8					Baf	Mock	Baf1A	Washout	Mock	Baf1A	Washout	Mock	Baf1A	Washout
UBQLN2 pellet	0.0151	0.0373	0.0133	0.0536	0.0926	0.05	0.0552	0.17	0.14					2021-09-02	1	2.09416	0.728014	2.28688	2.7709	1.56552	2.66431	5.32276	4.98001
UBQLN2 soluble	0.348	0.391	0.426	0.51	0.711	0.718	0.443	0.598	0.536					2021-09-08	1	1.55115	2.19923	1.23221	2.65325	3.45912	2.14826	5.9377	9.71731
ratio	0.0415863	0.0870885	0.0302754	0.0951029	0.115231	0.0651042	0.110799	0.221354	0.207101					2021-10-02	1	0.869502	0.981688	0.553675	1.20856	1.21926	2.05602	5.57994	9.14749
ratio	1	2.09416	0.728014	2.28688	2.7709	1.56552	2.66431	5.32276	4.98001
														AVE	1	1.50494	1.30298	1.35759	2.2109	2.0813	2.28953	5.61347	7.94827
														STDE	0	0.273945	0.351104	0.389901	0.388413	0.538268	0.146352	0.137874	1.15461
3334 3335 3337	Sol
2021-09-08	WT			P497H			4XALS (C1)
Baf	0h	Baf	B-8	0h	Baf	B-8	0h	Baf	B-8
UBQLN2 pellet	0.0527	0.0627	0.0852	0.0568	0.0967	0.171	0.0588	0.347	0.403
UBQLN2 soluble	1.75	1.32	1.24	1.52	1.15	1.52	1.02	0.977	1.19
ratio	0.0292339	0.0453461	0.0642922	0.0360223	0.0775648	0.101124	0.054505	0.262085	0.252982
ratio	1	1.55115	2.19923	1.23221	2.65325	3.45912	1.86444	8.96508	8.65371
3356	Sol
2021-10-02	WT			P497H			4XALS (C1)
Baf	0h	Baf	B-8	0h	Baf	B-8	0h	Baf	B-8
UBQLN2 pellet	0.00894	0.00929	0.0134	0.00459	0.0132	0.0147	0.0252	0.0945	0.209
UBQLN2 soluble	0.326	0.391	0.498	0.306	0.396	0.437	0.434	0.54	0.647
ratio	0.0266913	0.0232082	0.0262026	0.0147783	0.0322581	0.0325437	0.054878	0.148936	0.244159
ratio	1	0.869502	0.981688	0.553675	1.20856	1.21926	2.05602	5.57994	9.14749
