# Supplementary material for: Axon guidance genes modulate neurotoxicity of ALS-associated UBQLN2
Source: eLife journal article supplement (doi:10.7554/elife.84382), 2023-04-11
Supplement: fig8-data1 [file Figure 8B source data_1.xlsx]

## Sheet: 4XALS-C2
Cell Name	Ave size	Stdev size	Num	Cell Body Size	Particle Density
p4x-7-20.nd2-Merged-1	0.0856667	0.0709046	6	47.065	0.127483
p4x-7-8.nd2-Merged-2	0.0786667	0.0661382	6	89.452	0.0670751
p4x-7-3.nd2-Merged-1	0.1405	0.171827	2	69.907	0.0286094
p4x-7-15.nd2-Merged-1	0.0413333	0.0535637	6	95.558	0.0627891
p4x-7-8.nd2-Merged-1	0.0786667	0.0661382	6	84.798	0.0707564
p4x-7-11.nd2-Merged-1	0.148	0	1	46.956	0.0212965
p4x-7-7.nd2-Merged-1	0.057	0	1	104.433	0.00957552
p4x-7-24.nd2-Merged-1	0.135667	0.114925	6	79.044	0.0759071
p4x-7-2.nd2-Merged-1	0.0475	0.0403051	2	71.264	0.0280647
p4x-7-21.nd2-Merged-1	0.017	0.0169706	2	44.519	0.0449246
p4x-7-2.nd2-Merged-2	0.10825	0.0871641	4	96.738	0.0413488
p4x-7-9.nd2-Merged-1	0.0855	0.0403051	2	61.927	0.0322961
p4x-7-21.nd2-Merged-2	0.0095	0.00636396	2	21.929	0.0912034
p4x-7-2.nd2-Merged-3	0.1165	0.0502046	2	70.712	0.0282837
p4x-7-14.nd2-Merged-1	0.0656667	0.0500025	9	83.256	0.1081
p4x-7-25.nd2-Merged-2	0.0761429	0.0532899	7	70.964	0.0986416
p4x-7-10.nd2-Merged-1	0.08	0.0653452	5	91.912	0.0543999
p4x-7-25.nd2-Merged-1	0.0525	0.033234	2	69.76	0.0286697
p4x-7-6.nd2-Merged-1	0.0275	0.0155885	4	119.737	0.0334065
p4x-7-1.nd2-Merged-2	0.01	0	1	50.786	0.0196905
p4x-7-22.nd2-Merged-2	0.0095	0.00636396	2	46.175	0.0433135
p4x-7-29.nd2-Merged-1	0.045	0.0169706	2	94.996	0.0210535
p4x-7-1.nd2-Merged-1	0.01	0	1	64.04	0.0156152
p4x-7-22.nd2-Merged-1	0.0095	0.00636396	2	64.083	0.0312095
p4x-7-18.nd2-Merged-1	0.0614444	0.0465487	9	109.444	0.0822338
p4x-7-5.nd2-Merged-1	0.0762	0.066398	5	68.28	0.0732279
p4x-7-13.nd2-Merged-1	0.073125	0.0612989	8	77.936	0.102648
p4x-7-28.nd2-Merged-1	0.031	0.00282843	2	55.345	0.036137
p4x-7-16.nd2-Merged-1	0.105857	0.0827777	7	74.89	0.0934704
p4x-7-23.nd2-Merged-2	0.0595	0.0643467	2	36.767	0.0543966
p4x-7-28.nd2-Merged-2	0.0615	0.0671751	2	33.026	0.0605583
p4x-7-23.nd2-Merged-1	0.164	0.0438406	2	64.492	0.0310116
p4x-7-4.nd2-Merged-1	0.0522727	0.0587045	11	69.608	0.158028
p4x-7-19.nd2-Merged-1	0.1	0	1	71.587	0.013969
p4x-7-12.nd2-Merged-1	0.0475	0.0403051	2	47.803	0.0418384
cntrl-p4x-7-10	0.0765455	0.0676186	11	78.897	0.139422
cntrl-p4x-7-3	0.171	0	1	132.634	0.00753954
cntrl-p4x-7-2	0.05125	0.0447876	8	104.333	0.0766776
cntrl-p4x-7-11	0.136333	0.0948754	3	58.263	0.0514907
cntrl-p4x-7-13	0.024	0.0242487	3	62.812	0.0477616
cntrl-p4x-7-1	0.116667	0.137028	12	237.847	0.0504526
cntrl-p4x-7-12	0.394	0.439843	5	73.439	0.0680837
cntrl-p4x-7-16	0.128909	0.18979	11	117.106	0.093932
cntrl-p4x-7-5	0.224	0.222032	2	58.696	0.0340739
cntrl-p4x-7-4	0.1625	0.181775	8	148.957	0.0537068
cntrl-p4x-7-17	0.07175	0.0750039	4	97.956	0.0408347
cntrl-p4x-7-15	0.0951667	0.0450263	6	100.902	0.0594636
cntrl-p4x-7-6	0.0292857	0.0203856	7	103.976	0.0673232
cntrl-p4x-7-7	0.05	0.0636396	2	147.339	0.0135741
cntrl-p4x-7-14	0.062	0.0465833	4	94.178	0.0424728
cntrl-p4x-7-19	0.1235	0.120915	2	110.905	0.0180335
cntrl-p4x-7-18	0.07975	0.0919941	4	137.117	0.0291722
cntrl-p4x-7-9	0.352333	0.538696	6	95.8	0.0626305
cntrl-p4x-7-8	0.0476667	0.0367469	3	99.189	0.0302453
cntrl-p4x-7-22	0.0965	0.0847604	4	107.717	0.0371343
cntrl-p4x-7-20	0.058	0.0635012	6	92.936	0.0645606
cntrl-p4x-7-21	0.2475	0.346184	4	72.282	0.0553388

## Sheet: 4XALS-C1
Cell Name	Ave size	Stdev size	Num	Cell Body Size	Particle Density
p4x-20-10.nd2-Merged2	0.284143	0.440394	7	191.839	0.0364889
p4x-20-19.nd2-Merged-1	0.0562	0.041427	5	123.273	0.0405604
p4x-20-27.nd2-Merged-1	0.0638571	0.055457	7	107.521	0.0651036
p4x-20-33.nd2-Merged-1	0.0705	0.123882	10	126.966	0.0787612
p4x-20-12.nd2-Merged-1	0.0897727	0.0631687	22	412.202	0.0533719
p4x-20-9.nd2-Merged-1	0.095	0.046669	2	131.758	0.0151793
p4x-20-6.nd2-Merged-2	0.137357	0.178067	42	476.889	0.0880708
p4x-20-28.nd2-Merged-1	0.0365	0.0422694	6	102.872	0.0583249
p4x-20-16.nd2-Merged-1	0.175333	0.281505	12	154.591	0.0776242
p4x-20-23.nd2-Merged-1	0.017	0.0169706	2	204.754	0.00976782
p4x-20-16.nd2-Merged-2	0.1475	0.0891289	14	146.944	0.0952744
p4x-20-32.nd2-Merged-3	0.04175	0.0476331	4	53.547	0.0747007
p4x-20-18.nd2-Merged-1	0.069	0.0367696	2	60.314	0.0331598
p4x-20-26.nd2-Merged-1	0.088	0.0367696	2	93.083	0.0214862
p4x-20-3.nd2-Merged-1	0.0708571	0.0823072	7	93.578	0.0748039
p4x-20-32.nd2-Merged-2	0.043	0	1	40.265	0.0248355
p4x-20-13.nd2-Merged-1	0.0866508	0.0695276	126	1089.55	0.115644
p4x-20-26.nd2-Merged-2	0.02	0.0343511	6	98.047	0.0611951
p4x-20-3.nd2-Merged-2	0.029	0	1	125.981	0.0079377
p4x-20-26.nd2-Merged-3	0.059625	0.0437687	8	85.669	0.0933827
p4x-20-32.nd2-Merged-1	0.043	0	1	25.731	0.0388636
p4x-20-32.nd2-Merged-5	0.06275	0.0535098	12	87.135	0.137717
p4x-20-29.nd2-Merged-1	0.07	0.0460869	4	133.172	0.0300363
p4x-20-17.nd2-Merged-1	0.100714	0.149519	7	56.992	0.122824
p4x-20-32.nd2-Merged-4	0.117333	0.114727	3	67.856	0.0442113
p4x-20-17.nd2-Merged-2	0.0255	0.0271643	6	58.034	0.103388
p4x-20-7.nd2-Merged-1	0.097	0.0993161	14	78.245	0.178925
p4x-20-22.nd2-Merged-1	0.0746667	0.0560387	3	97.309	0.0308296
p4x-20-25.nd2-Merged-2	0.0981429	0.0793191	14	99.151	0.141199
p4x-20-25.nd2-Merged-3	0.0416667	0.0548483	3	55.836	0.0537288
p4x-20-31.nd2-Merged-1	0.101667	0.0595175	3	124.43	0.0241099
p4x-20-25.nd2-Merged-1	0.0513077	0.0381016	13	153.668	0.084598
p4x-20-31.nd2-Merged-2	0.043	0	1	128.522	0.00778077
p4x-20-21.nd2-Merged-1	0.117333	0.0845309	6	136.108	0.0440826
p4x-20-4.nd2-Merged-1	0.085	0.0701308	7	316.04	0.0221491
p4x-20-14.nd2-Merged-1	0.0763704	0.0916335	27	450.577	0.0599232
p4x-20-21.nd2-Merged-2	0.108143	0.0612248	7	131.834	0.0530971
p4x-20-4.nd2-Merged-2	0.1145	0.0966937	4	147.339	0.0271483
p4x-20-30.nd2-Merged-1	0.101667	0.0595175	3	136.627	0.0219576
p4x-20-24.nd2-Merged-1	0.0633846	0.0569862	13	105.613	0.123091
p4x-20-1.nd2-Merged-1	0.0761818	0.0583898	11	0.081	135.802
p4x-20-20.nd2-Merged-1	0.0791667	0.0724967	6	126.409	0.047465
p4x-20-5.nd2-Merged-2	0.05452	0.041132	25	373.141	0.0669988
p4x-20-20.nd2-Merged-2	0.1714	0.211586	5	96.419	0.051857
p4x-20-15.nd2-Merged-1	0.0418	0.0368877	5	177.039	0.0282424
cntrl-p4x-20-7	0.0682222	0.068967	9	79.616	0.113043
cntrl-p4x-20-6	0.117667	0.125021	3	73.424	0.0408586
cntrl-p4x-20-4	0.1936	0.313931	15	84.96	0.176554
cntrl-p4x-20-5	0.115	0.118262	7	60.932	0.114882
cntrl-p4x-20-1	0.077	0.0689529	5	49.711	0.100581
cntrl-p4x-20-2	0.077	0.0689529	5	49.711	0.100581
cntrl-p4x-20-3	0.0681538	0.0631755	13	65.567	0.19827
cntrl-p4x-20-14	0.0743333	0.0620672	3	59.776	0.0501874
cntrl-p4x-20-8	0.1147	0.143949	10	59.229	0.168836
cntrl-p4x-20-12	0.148333	0.0985752	6	65.548	0.091536
cntrl-p4x-20-13	0.141667	0.138923	12	114.45	0.104849
cntrl-p4x-20-9	0.196667	0.190983	3	52.928	0.0566808
cntrl-p4x-20-11	0.088	0.101051	4	57.396	0.0696913
cntrl-p4x-20-10	0.1095	0.108598	6	52.585	0.114101

## Sheet: 4XALS-C2 Baf
Cell Name	Ave size	Stdev size	Num	Cell Body Size	Particle Density
p4x-7-baf-18.nd2-Merged-1	0.153571	0.155745	14	97.747	0.143227
p4x-7-baf-6.nd2-Merged-3	0.1713	0.164314	10	134.242	0.0744923
p4x-7-baf-13.nd2-Merged-2	0.0696667	0.0598693	3	49.454	0.0606624
p4x-7-baf-6.nd2-Merged-2	0.0732143	0.0734545	14	91.974	0.152217
p4x-7-baf-18.nd2-Merged-2	0.149417	0.104338	12	59.685	0.201056
p4x-7-baf-13.nd2-Merged-1	0.119375	0.106066	24	83.166	0.288579
p4x-7-baf-6.nd2-Merged-1	0.1728	0.179042	15	70.264	0.213481
p4x-7-baf-2.nd2-Merged-1	0.18625	0.164414	16	84.988	0.188262
p4x-7-baf-9.nd2-Merged-2	0.0755714	0.0514421	7	73.02	0.0958641
p4x-7-baf-17.nd2-Merged-1	0.202357	0.123205	14	67.523	0.207337
p4x-7-baf-9.nd2-Merged-1	0.158667	0.0433859	3	73.981	0.040551
p4x-7-baf-17.nd2-Merged-2	0.129889	0.0626846	9	76.013	0.118401
p4x-7-baf-12.nd2-Merged-3	0.216304	0.22857	23	69.912	0.328985
p4x-7-baf-12.nd2-Merged-2	0.246333	0.270013	12	69.141	0.173558
p4x-7-baf-7.nd2-Merged-1	0.269667	0.159638	3	89.895	0.0333723
p4x-7-baf-12.nd2-Merged-1	0.233636	0.154962	22	70.098	0.313846
p4x-7-baf-16.nd2-Merged-1	0.1285	0.0460076	6	40.783	0.14712
p4x-7-baf-3.nd2-Merged-1	0.115583	0.0925822	24	72.101	0.332866
p4x-7-baf-8.nd2-Merged-1	0.178273	0.198222	11	78.626	0.139903
p4x-7-baf-3.nd2-Merged-2	0.083	0.0703468	7	36.805	0.190192
p4x-7-baf-4.nd2-Merged-1	0.1332	0.0911492	15	68.266	0.219729
p4x-7-baf-11.nd2-Merged-1	0.152261	0.179588	23	75.152	0.306046
p4x-7-baf-4.nd2-Merged-2	0.138937	0.166831	16	57.782	0.276903
p4x-7-baf-11.nd2-Merged-2	0.164733	0.172418	15	51.948	0.28875
p4x-7-baf-4.nd2-Merged-3	0.145	0.0897441	5	95.058	0.0525995
p4x-7-baf-15.nd2-Merged-2	0.117067	0.0752685	15	50.016	0.299904
p4x-7-baf-15.nd2-Merged-1	0.156438	0.167393	16	66.852	0.239335
p4x-7-baf-4.nd2-Merged-4	0.0956667	0.0810043	12	90.885	0.132035
p4x-7-baf-4.nd2-Merged-5	0.1651	0.117121	10	74.162	0.13484
p4x-7-baf-10.nd2-Merged-1	0.0645	0.0304056	2	43.039	0.0464695
p4x-7-baf-5.nd2-Merged-1	0.242417	0.206028	12	58.205	0.206168
p4x-7-baf-10.nd2-Merged-2	0.1225	0.124027	14	141.647	0.0988373
p4x-7-baf-5.nd2-Merged-2	0.220375	0.289793	16	76.589	0.208907
p4x-7-baf-14.nd2-Merged-3	0.136333	0.112913	12	52.19	0.229929
p4x-7-baf-14.nd2-Merged-2	0.138333	0.144424	6	60.076	0.0998735
p4x-7-baf-1.nd2-Merged-1	0.221059	0.222172	17	151.46	0.112241
p4x-7-baf-14.nd2-Merged-1	0.158667	0.172853	9	53.685	0.167645
baf-p4x-7-13	0.226687	0.475489	16	99.155	0.161364
baf-p4x-7-12	0.1915	0.0864118	4	25.098	0.159375
baf-p4x-7-10	0.188579	0.298372	19	104.747	0.181389
baf-p4x-7-11	0.324235	0.545676	17	49.311	0.344751
baf-p4x-7-15	0.244231	0.565967	26	91.955	0.282747
baf-p4x-7-14	0.879857	3.7834	21	112.97	0.18589
baf-p4x-7-16	0.391705	0.752739	61	169.191	0.360539
baf-p4x-7-17	0.673472	2.31048	36	187.285	0.19222
baf-p4x-7-9	0.127786	0.129755	14	65.553	0.213568
baf-p4x-7-8	0.281271	0.438651	48	106.322	0.451459
baf-p4x-7-6	0.189471	0.173738	51	171.675	0.297073
baf-p4x-7-7	0.436174	0.915809	23	86.944	0.264538
baf-p4x-7-5	0.168133	0.118233	15	100.331	0.149505
baf-p4x-7-4	0.16605	0.246656	20	140.8	0.142045
baf-p4x-7-1	0.246125	0.194638	8	112.475	0.0711269
baf-p4x-7-3	0.435857	0.717916	14	115.84	0.120856
baf-p4x-7-2	0.260727	0.277037	22	100.445	0.219025
baf-p4x-7-26	0.8509	2.14412	10	73.51	0.136036
baf-p4x-7-25	0.280833	0.331902	12	79.354	0.151221
baf-p4x-7-19	0.12025	0.0788474	4	80.653	0.0495952
baf-p4x-7-18	0.131379	0.10408	29	105.551	0.274749
baf-p4x-7-24	0.173	0.0398873	3	52.728	0.0568958
baf-p4x-7-20	0.17525	0.179304	28	98.275	0.284915
baf-p4x-7-21	0.105917	0.077815	12	83.413	0.143862
baf-p4x-7-23	0.04275	0.0422719	4	109.316	0.0365912
baf-p4x-7-22	0.183789	0.186439	19	90.033	0.211034

## Sheet: 4XALS-C1 Baf
p4x-20-baf-6.nd2-Merged-1	0.121958	0.101763	24	92.06	0.2607
p4x-20-baf-11.nd2-Merged-1	0.145889	0.197304	18	97.214	0.185159
p4x-20-baf-11.nd2-Merged-2	0.150593	0.187497	27	80.662	0.33473
p4x-20-baf-15.nd2-Merged-2	0.166	0.156679	18	70.431	0.255569
p4x-20-baf-20.nd2-Merged-1	0.135739	0.136332	23	82.395	0.279143
p4x-20-baf-9.nd2-Merged-1	0.347667	0.26266	3	32.446	0.0924613
p4x-20-baf-15.nd2-Merged-1	0.261917	0.251245	12	63.074	0.190253
p4x-20-baf-2.nd2-Merged-1	0.127444	0.0568465	9	52.414	0.17171
p4x-20-baf-9.nd2-Merged-2	0.08575	0.0952004	12	61.48	0.195185
p4x-20-baf-7.nd2-Merged-1	0.136	0.111697	11	64.202	0.171334
p4x-20-baf-8.nd2-Merged-4	0.260778	0.336358	9	47.198	0.190686
p4x-20-baf-7.nd2-Merged-3	0.194944	0.190026	18	64.773	0.277894
p4x-20-baf-7.nd2-Merged-2	0.1095	0.147478	10	68.837	0.145271
p4x-20-baf-8.nd2-Merged-1	0.160739	0.130114	23	62.217	0.369674
p4x-20-baf-8.nd2-Merged-2	0.149571	0.168858	14	77.907	0.179701
p4x-20-baf-3.nd2-Merged-1	0.187077	0.171787	13	60.176	0.216033
p4x-20-baf-14.nd2-Merged-1	0.192105	0.179451	19	57.515	0.330349
p4x-20-baf-18.nd2-Merged-1	0.100733	0.0915232	15	74.486	0.20138
p4x-20-baf-4.nd2-Merged-2	0.223167	0.240708	18	56.235	0.320085
p4x-20-baf-18.nd2-Merged-2	0.158462	0.168962	13	57.135	0.227531
p4x-20-baf-13.nd2-Merged-1	0.276364	0.229131	11	70.398	0.156254
p4x-20-baf-4.nd2-Merged-1	0.133933	0.114979	15	71.245	0.210541
p4x-20-baf-17.nd2-Merged-1	0.297615	0.358315	13	76.898	0.169055
p4x-20-baf-17.nd2-Merged-2	0.351933	0.394658	15	71.002	0.211262
p4x-20-baf-5.nd2-Merged-2	0.179667	0.114729	21	64.63	0.324927
p4x-20-baf-19.nd2-Merged-1	0.0998276	0.137222	29	98.032	0.295822
p4x-20-baf-5.nd2-Merged-1	0.129214	0.145666	28	62.779	0.446009
p4x-20-baf-12.nd2-Merged-1	0.193647	0.232429	17	81.386	0.208881
p4x-20-baf-1.nd2-Merged-4	0.195357	0.205784	28	96.828	0.289173
p4x-20-baf-1.nd2-Merged-1	0.21075	0.191434	8	75.509	0.105948
p4x-20-baf-16.nd2-Merged-2	0.335385	0.315477	13	68.694	0.189245
p4x-20-baf-1.nd2-Merged-3	0.165607	0.191859	28	84.284	0.33221
p4x-20-baf-1.nd2-Merged-2	0.117071	0.119401	14	80.134	0.174707
p4x-20-baf-16.nd2-Merged-3	0.395267	0.467678	15	86.168	0.174079
baf-p4x-20-23	0.184	0.188231	6	69.589	0.0862205
baf-p4x-20-4	0.310917	0.448987	12	79.492	0.150959
baf-p4x-20-5	0.4659	0.956236	10	54.955	0.181967
baf-p4x-20-36	0.325788	0.50908	33	93.568	0.352685
baf-p4x-20-22	1.0182	0.643169	5	85.921	0.058193
baf-p4x-20-34	0.645556	0.887413	9	67.171	0.133986
baf-p4x-20-20	0.454273	0.464944	11	86.63	0.126977
baf-p4x-20-7	1.14674	2.8453	27	93.816	0.287797
baf-p4x-20-6	1.3259	3.55551	20	77.831	0.256967
baf-p4x-20-21	0.786	1.40207	6	54.555	0.109981
baf-p4x-20-35	0.40675	0.332944	8	85.279	0.0938097
baf-p4x-20-19	1.12788	2.35552	17	48.783	0.348482
baf-p4x-20-31	0.228909	0.148388	11	122.831	0.0895539
baf-p4x-20-25	0.256636	0.237774	11	62.979	0.174661
baf-p4x-20-2	0.7336	1.06899	25	123.207	0.202911
baf-p4x-20-3	0.24225	0.284377	8	92.545	0.0864444
baf-p4x-20-24	0.3336	0.229918	10	86.088	0.11616
baf-p4x-20-30	0.212143	0.233153	7	101.811	0.0687548
baf-p4x-20-18	1.37706	3.62492	17	71.949	0.236278
baf-p4x-20-26	0.371636	0.812952	11	108.012	0.101841
baf-p4x-20-32	0.182412	0.20816	17	110.715	0.153547
baf-p4x-20-1	0.331818	0.36358	11	62.669	0.175525
baf-p4x-20-33	0.3908	0.611009	10	83.113	0.120318
baf-p4x-20-27	0.147	0.12644	9	81.728	0.110121
baf-p4x-20-16	0.207833	0.182546	6	44.129	0.135965
baf-p4x-20-17	0.43	0.360828	3	46.242	0.0648761
baf-p4x-20-15	0.70675	0.93184	4	60.047	0.0666145
baf-p4x-20-29	0.120444	0.0943996	9	108.454	0.0829845
baf-p4x-20-28	0.310333	0.405799	6	73.191	0.0819773
baf-p4x-20-14	0.4445	0.474011	8	78.597	0.101785
baf-p4x-20-10	0.542556	0.878893	9	64.421	0.139706
baf-p4x-20-11	0.208778	0.181853	9	26.278	0.342492
baf-p4x-20-13	0.123875	0.128225	8	69.612	0.114923
baf-p4x-20-8	0.187571	0.14423	7	73.981	0.0946189
baf-p4x-20-9	0.431692	0.30985	13	59.685	0.21781
baf-p4x-20-12	1.13395	2.997	19	53.123	0.357661
