# Supplementary material for: Axon guidance genes modulate neurotoxicity of ALS-associated UBQLN2
Source: eLife journal article supplement (doi:10.7554/elife.84382), 2023-04-11
Supplement: fig9-data1 [file Figure 9A_source data_1.xlsx]

## Sheet: terminal branch length-1
shNT	shDCC	shUNC5B
51.2101	64.3909	75.9291
14.8558	556.528	176.608
4.1256	45.0368	154.156
59.4137	102.186	150.941
392.033	74.6387	55.6217
148.325	95.4661	179.333
53.1954	81.1768	350.355
117.804	11.5626	21.1714
90.9191	205.733	59.3905
68.875	65.3057	96.4215
94.639	81.8559	468.862
163.826	389.222	98.8639
134.519	90.8544	67.7807
158.739	40.053	188.723
42.0377	107.502	236.275
43.1519	58.1761	53.6252
98.8377	238.101	96.9134
178.719	104.619	214.949
45.6686	465.879	71.8833
204.227	75.6076	86.0983
134.345	101.138	111.497
50.1452	232.517	29.2605
172.771	149.066	83.3015
132.982	140.006	145.477
143.099	39.2787	113.901
101.042	125.043	44.744
33.0293	53.059	77.6707
98.0927	24.0017	208.019
22.3992	267.768	54.7424
41.2483	268.931	186.267
115.724	152.471	181.846
131.844	61.2585	269.698
219.688	143.353	151.713
111.677	133.107	297.245
329.509	167.831	99.3698
44.0591	115.183	370.25
63.5258	76.0599	307.58
132.538	203.207	47.0103
31.6604	110.1	103.625
199.183	131.234	119.556
34.6616	63.6972	293.131
226.32	128.257	311.94
65.3155	318.538	96.546
29.2916	189.96	49.0161
88.2723	82.7093	273.763
64.1344	164.834	98.0051
156.586	81.8406	112.572
66.661	204.224	196.839
182.245	292.135	189.972
80.4762	411.534	78.489
191.201	406.9	198.652
52.8668	260.932	127.195
265.769	124	237.713
70.4225	74.7213	260.833
35.6724	91.1926	132.818
103.462	138.554	71.7147
44.3031	162.715	70.723
39.0702	32.2529	60.8052
36.4505	294.787	199.079
130.84	89.9543	165.737
31.0574	58.9429	616.171
232.636	170.906	68.0997
155.839	75.4825	52.3479
50.5053	100.036	158.412
197.805		66.83
101.493		744.747
62.6124		243.512
47.7713		355.04
102.386		221.446
22.9035		232.147
57.4203		49.5891
59.4773		32.1025
186.216		307.868
212.039		109.348
66.7904		82.3981
50.5702		417.141
46.1034		289.065
77.5851		76.4573
78.1512		484.527
75.8504
33.2333
61.8245
12.9812

## Sheet: terminal branch length-1 ANOVA
Table Analyzed	terminal branch length-1
Data sets analyzed	A-C
ANOVA summary
F	9.116
P value	0.0002
P value summary	***
Significant diff. among means (P < 0.05)?	Yes
R squared	0.07558
Brown-Forsythe test
F (DFn, DFd)	5.022 (2, 223)
P value	0.0074
P value summary	**
Are SDs significantly different (P < 0.05)?	Yes
Bartlett's test
Bartlett's statistic (corrected)	27.64
P value	<0.0001
P value summary	****
Are SDs significantly different (P < 0.05)?	Yes
ANOVA table	SS	DF	MS	F (DFn, DFd)	P value
Treatment (between columns)	218710	2	109355	F (2, 223) = 9.116	P=0.0002
Residual (within columns)	2675000	223	11996
Total	2893710	225
Data summary
Number of treatments (columns)	3
Number of values (total)	226

## Sheet: # branch points per neuron-1
shNT	shDCC	shUNC5B
1	2	0
1	1	0
0	1	2
1	4	13
2	3	3
1	2	2
1	2	1
1	0	0
2	2	1
1	2	1
1	3	1
1	2	1
0	3	3
1	1	1
1	1	0
1	3	3
2	4	0
1	2	0
1	3	2
5	2	3
1	5	3
3	1	4
1	2	2
1	2	3
1	2	0
0	3	3
2	2	2
3	2	3
4	1	1
2	1	1
2	1	5
1	4	1
1	2	2
12	1	0
1	1	5
3	3	1
1	4	3
1	1	4
2	4	2
1	6	2
1	2	1
1	2	1
0	2	1
0	1	1
0	5	0
1	1	1
1	2	2
0	4	2
1	9	1
2	2	1
1	1	6
1	0	0
2	2	2
1	4	1
1	2	3
1	5	1
1	3	2
2	2	3
1	4	2
1	5	1
1	2	1
1	4	1
2	5	3
3	6	3
1		3
1		1
2		1
1		0
1		1
0		1
3		1
3		3
0		1
1		4
1		5
1		2
1		0
1		3
1		3
6
0
4
0

## Sheet: #branch points per neuron ANOVA
Table Analyzed	# branch points per neuron-1
Data sets analyzed	A-C
ANOVA summary
F	7.873
P value	0.0005
P value summary	***
Significant diff. among means (P < 0.05)?	Yes
R squared	0.06595
Brown-Forsythe test
F (DFn, DFd)	2.593 (2, 223)
P value	0.077
P value summary	ns
Are SDs significantly different (P < 0.05)?	No
Bartlett's test
Bartlett's statistic (corrected)	2.057
P value	0.3576
P value summary	ns
Are SDs significantly different (P < 0.05)?	No
ANOVA table	SS	DF	MS	F (DFn, DFd)	P value
Treatment (between columns)	45.67	2	22.83	F (2, 223) = 7.873	P=0.0005
Residual (within columns)	646.8	223	2.9
Total	692.5	225
Data summary
Number of treatments (columns)	3
Number of values (total)	226

## Sheet: primary branch length-1
shNT	shDCC	shUNC5B
51.2101	189.51	75.9291
106.455	556.528	176.608
4.1256	199.016	187.233
59.4137	67.0209	77.7235
112.897	40.6735	226.7
148.325	287.571	148.491
53.1954	32.6159	350.355
117.804	11.5626	21.1714
38.3778	204.742	59.3905
68.875	88.1341	92.8766
94.639	68.0683	468.862
163.826	140.681	98.8639
134.519	173.264	102.784
158.739	30.618	188.723
42.0377	107.502	236.275
43.1519	23.2938	11.2355
49.0702	219.938	96.9134
178.719	140.49	214.949
45.6686	70.1817	75.1277
264.303	213.623	39.7152
134.345	80.4521	48.3365
100.92	232.517	22.3975
172.771	45.4658	155.29
132.982	162.38	73.53
143.099	194.91	113.901
101.042	117.399	159.12
38.7015	183.045	64.4144
53.6274	115.863	262.773
63.5956	267.768	54.7424
52.1213	268.931	186.267
221.755	152.471	99.5557
131.844	94.6905	269.698
219.688	124.549	94.7004
57.7816	133.107	297.245
329.509	167.831	25.7967
58.4141	73.8817	370.25
63.5258	40.4796	240.08
132.538	203.207	192.719
40.9398	85.6214	41.4608
199.183	68.8809	192.377
34.6616	30.5294	293.131
226.32	117.906	311.94
65.3155	206.189	96.546
29.2916	189.96	49.0161
88.2723	20.3741	273.763
64.1344	164.834	98.0051
156.586	181.532	127.306
66.661	36.5106	182.284
182.245	62.5402	189.972
69.4707	178.104	78.489
191.201	32.8875	62.3797
52.8668	260.932	127.195
60.7651	160.582	168.299
70.4225	86.1323	260.833
35.6724	147.275	27.0382
103.462	76.6259	71.7147
44.3031	144.264	185.739
46.9583	152.687	129.722
36.4505	427.274	158.17
130.84	74.4476	165.737
69.0765	91.1924	616.171
232.636	76.3949	167.314
125.756	177.028	26.0603
46.5089	78.6225	57.2161
197.805		187.319
101.493		744.747
55.4784		243.512
47.7713		355.04
102.386		221.446
22.9035		232.147
43.7925		49.5891
40.8326		54.2815
186.216		307.868
212.039		83.5639
153.074		52.6057
50.5702		226.332
46.1034		289.065
77.5851		115.618
78.1512		16.4302
75.8375
33.2333
48.5634
12.9812

## Sheet: primary branch length-1 ANOVA
Table Analyzed	primary branch length-1
Data sets analyzed	A-C
ANOVA summary
F	8.855
P value	0.0002
P value summary	***
Significant diff. among means (P < 0.05)?	Yes
R squared	0.07357
Brown-Forsythe test
F (DFn, DFd)	7.511 (2, 223)
P value	0.0007
P value summary	***
Are SDs significantly different (P < 0.05)?	Yes
Bartlett's test
Bartlett's statistic (corrected)	34.35
P value	<0.0001
P value summary	****
Are SDs significantly different (P < 0.05)?	Yes
ANOVA table	SS	DF	MS	F (DFn, DFd)	P value
Treatment (between columns)	178721	2	89360	F (2, 223) = 8.855	P=0.0002
Residual (within columns)	2250435	223	10092
Total	2429156	225
Data summary
Number of treatments (columns)	3
Number of values (total)	226

## Sheet: Neurite length-1
shNT	shDCC	shUNC5B
51.2101	220.586	75.9291
121.31	556.528	176.608
4.1256	244.053	269.154
59.4137	157.476	391.117
403.573	103.001	248.479
148.325	295.416	233.739
53.1954	124.16	350.355
117.804	11.5626	21.1714
116.606	231.205	59.3905
68.875	143.494	189.298
94.639	99.7015	468.862
163.826	423.663	98.8639
134.519	264.118	162.483
158.739	70.6709	188.723
42.0377	107.502	236.275
43.1519	76.556	76.5737
117.826	295.581	96.9134
178.719	185.075	214.949
45.6686	561.599	110.204
465.126	221.874	125.814
134.345	257.254	132.469
151.065	232.517	105.753
172.771	160.161	168.286
132.982	176.572	252.562
143.099	201.364	113.901
101.042	223.065	220.564
52.2738	193.775	92.2849
125.889	149.161	302.507
92.8561	267.768	54.7424
77.1938	268.931	186.267
292.785	152.471	284.529
131.844	157.231	269.698
219.688	177.324	224.64
282.056	133.107	297.245
329.509	167.831	174.329
93.2524	141.274	370.25
63.5258	218.573	338.823
132.538	203.207	250.301
48.7839	222.184	119.557
199.183	239.592	203.108
34.6616	76.3546	293.131
226.32	149.902	311.94
65.3155	332.854	96.546
29.2916	189.96	49.0161
88.2723	161.506	273.763
64.1344	164.834	98.0051
156.586	268.844	201.735
66.661	294.171	209.792
182.245	425.184	189.972
94.2866	513.557	78.489
191.201	439.788	323.935
52.8668	260.932	127.195
368.09	253.666	348.596
70.4225	166.928	260.833
35.6724	180.856	175.952
103.462	257.862	71.7147
44.3031	212.294	203.224
60.3802	164.293	181.382
36.4505	596.79	215.903
130.84	194.871	165.737
100.134	121.329	616.171
232.636	250.036	235.414
226.553	239.055	79.561
80.4707	220.517	215.628
197.805		246.291
101.493		744.747
91.9009		243.512
47.7713		355.04
102.386		221.446
22.9035		232.147
74.8059		49.5891
115.493		184.39
186.216		307.868
212.039		214.009
219.864		177.199
50.5702		465.426
46.1034		289.065
77.5851		211.482
78.1512		549.837
169.798
33.2333
123.374
12.9812

## Sheet: Neurite length-1 ANOVA
Table Analyzed	Neurite length-1
Data sets analyzed	A-C
ANOVA summary
F	20.91
P value	<0.0001
P value summary	****
Significant diff. among means (P < 0.05)?	Yes
R squared	0.1579
Brown-Forsythe test
F (DFn, DFd)	2.233 (2, 223)
P value	0.1096
P value summary	ns
Are SDs significantly different (P < 0.05)?	No
Bartlett's test
Bartlett's statistic (corrected)	11.2
P value	0.0037
P value summary	**
Are SDs significantly different (P < 0.05)?	Yes
ANOVA table	SS	DF	MS	F (DFn, DFd)	P value
Treatment (between columns)	522385	2	261193	F (2, 223) = 20.91	P<0.0001
Residual (within columns)	2786082	223	12494
Total	3308467	225
Data summary
Number of treatments (columns)	3
Number of values (total)	226
