# Supplementary material for: Axon guidance genes modulate neurotoxicity of ALS-associated UBQLN2
Source: eLife journal article supplement (doi:10.7554/elife.84382), 2023-04-11
Supplement: fig9-data1 [file Figure 9D_source data_1.xlsx]

## Sheet: % growth cones per neuron
UBQLN2WT	UBQLN2P497H	UBQLN24XALS	UBQLN24XALS shNT	UBQLN24XALS shDCC1	UBQLN24XALS shUnc5B
0	100	33.3333	66.6667	50	0
0	100	50	33.3333	50	50
100	50	0	0	100	0
50	50	0	33.3333	100	0
100	50	0	0	33.3333	14.2857
33.3333	25	50	0	50	100
0	0	100	66.6667	50	50
50	50	0	66.6667	100	75
100	50	0	100	50	66.6667
0	0	0	0	50	100
0	0	33.3333	50	50	100
50	0	50	40	50	100
50	50	50	0	100	50
0	50	0	0	100	100
40	33.3333	0	0	50	0
0	100	50	100	50	50
50	33.3333	40	66.6667	66.6667	0
25	50	100	25	33.3333	66.6667
100	0	100	50	100	50
100	50	100	66.6667	50	50
0	100	0	33.3333	100	100
0	66.6667	0	100	100	100
100	100	0	66.6667	50	100
100	71.4286	66.6667	0	66.6667	100
0	50	0	50	100	40
100	66.6667	0	0	100	100
50	100	0	0	66.6667	50
100	100	33.3333	0	50	50
66.6667	50	0	0	100	100
0	100	20	0	100	50
0	50	0	0	100	100
33.3333	50	40	100	100	50
50	0	0	100	100	50
50	33.3333	0	0	33.3333	100
50	75	0	100	100	100
50	66.6667	66.6667	100	100	100
0	16.6667	50	50	50	100
50	50	0	0	100	100
33.3333	100	0	50	100	75
0	0	0	0	0	33.3333
50	100	0	50	50	50
25	100	33.3333	0	100	50
0	25	0	50	50	50
100	0	33.3333	0	50	100
100	40	50	0	100	100
0	33.3333	0	20	75	50
50	0	100	0	33.3333	100
50	0	0	50	100	50
0		100	0	50	100
20		0	0	100	50
50		66.6667	33.3333	50	100
100		100	50	0	50
100		100	0	25	80
		50	0	66.6667	100
		0		0	0
		33.3333		20	57.1429
		0		75	0
		0		50	100
		50		66.6667	25
		0		0	100
		66.6667		60	66.6667
		50		75	100
		0		50	33.3333
		0		62.5	80
		0		75	66.6667
		50		50	100
		0		100	100
		0		66.6667	0
		0		100	100
		50		50	100
		0		66.6667	100
		0		0	66.6667
		0		100	50
		100		100	75
		100		33.3333	80
		50		50	40
		0		66.6667	100
		0		50	100
		0		100	100
		50		100	0
		100			0
		50			100
		0			50
		0			66.6667
		0			33.3333
		0			100
		100			0
		100			100
		0			50
		100			50
					100
					0
					100

## Sheet: ANOVA % growth cones per neuron
Table Analyzed	% growth cones per neuron
Data sets analyzed	A-F
ANOVA summary
F	15.97
P value	<0.0001
P value summary	****
Significant diff. among means (P < 0.05)?	Yes
R squared	0.1623
Brown-Forsythe test
F (DFn, DFd)	0.6982 (5, 412)
P value	0.625
P value summary	ns
Are SDs significantly different (P < 0.05)?	No
Bartlett's test
Bartlett's statistic (corrected)	5.022
P value	0.4131
P value summary	ns
Are SDs significantly different (P < 0.05)?	No
ANOVA table	SS	DF	MS	F (DFn, DFd)	P value
Treatment (between columns)	98861	5	19772	F (5, 412) = 15.97	P<0.0001
Residual (within columns)	510248	412	1238
Total	609109	417
Data summary
Number of treatments (columns)	6
Number of values (total)	418
