# Supplementary material for: Axon guidance genes modulate neurotoxicity of ALS-associated UBQLN2
Source: eLife journal article supplement (doi:10.7554/elife.84382), 2023-04-11
Supplement: fig9-figsupp1-data1 [file Figure 9-Figure supplement 1A, 1B_source data_1.xlsx]

## Sheet: shDCC
	4XALS	4XALS	4XALS	4XALS	4XALS
shNT	1	1	1	1
shDCC	0.519652	0.927598	0.539172	0.681867

## Sheet: shUnc5B
	4XALS	4XALS	4XALS	4XALS	4XALS
shNT	1	1	1	1	1
shUNC5B	0.268375	0.725128	0.725128	0.25636	0.193446
