# Supplementary figures and images for: Axon guidance genes modulate neurotoxicity of ALS-associated UBQLN2
Source: eLife journal article supplement (doi:10.7554/elife.84382), 2023-04-11

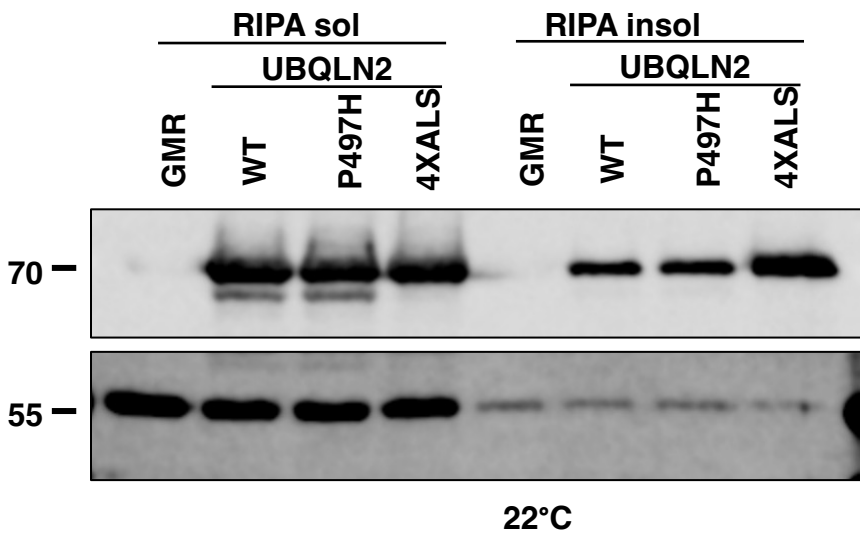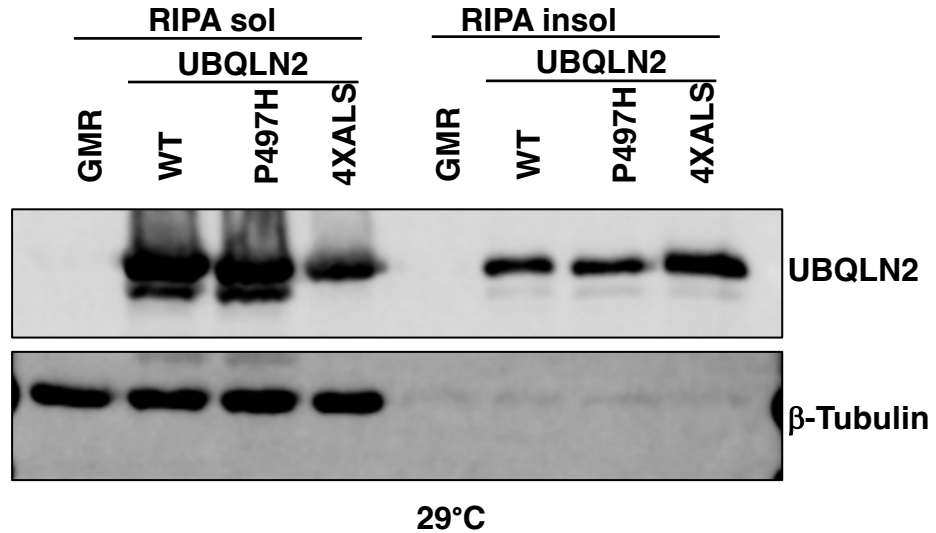

Supplement: fig1-figsupp1-data1 [file Figure 1-Figure supplement 1-1.pdf › Figure 1-Figure supplement 1 (A,B)/Figure 1-Figure supplement 1-1.pdf]

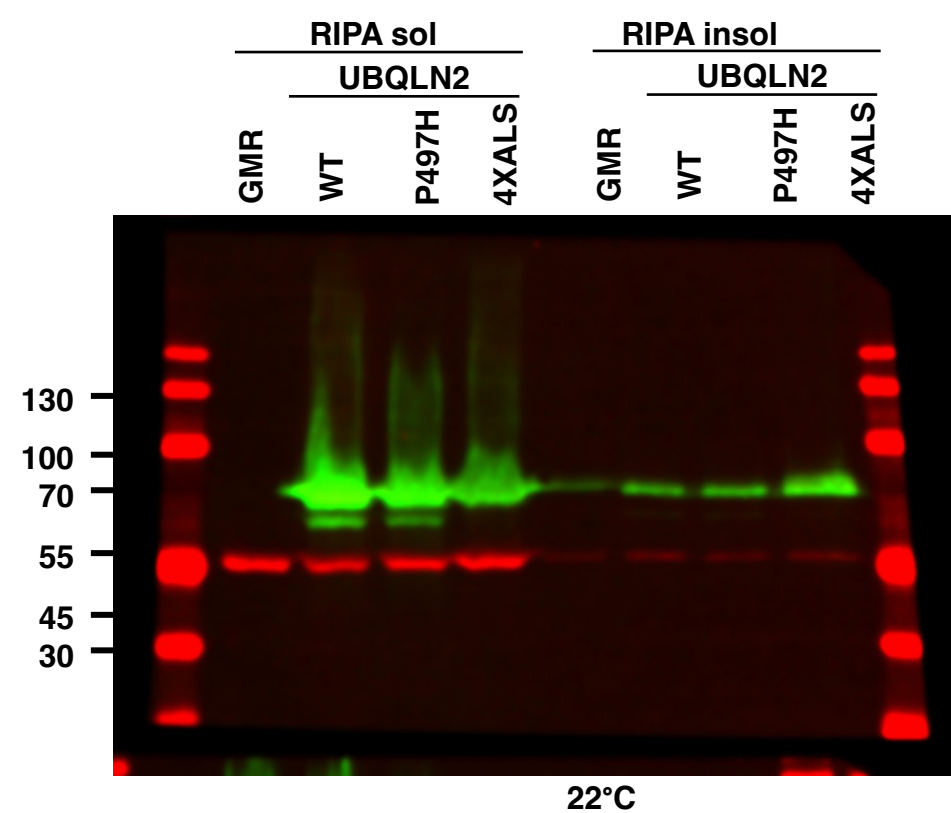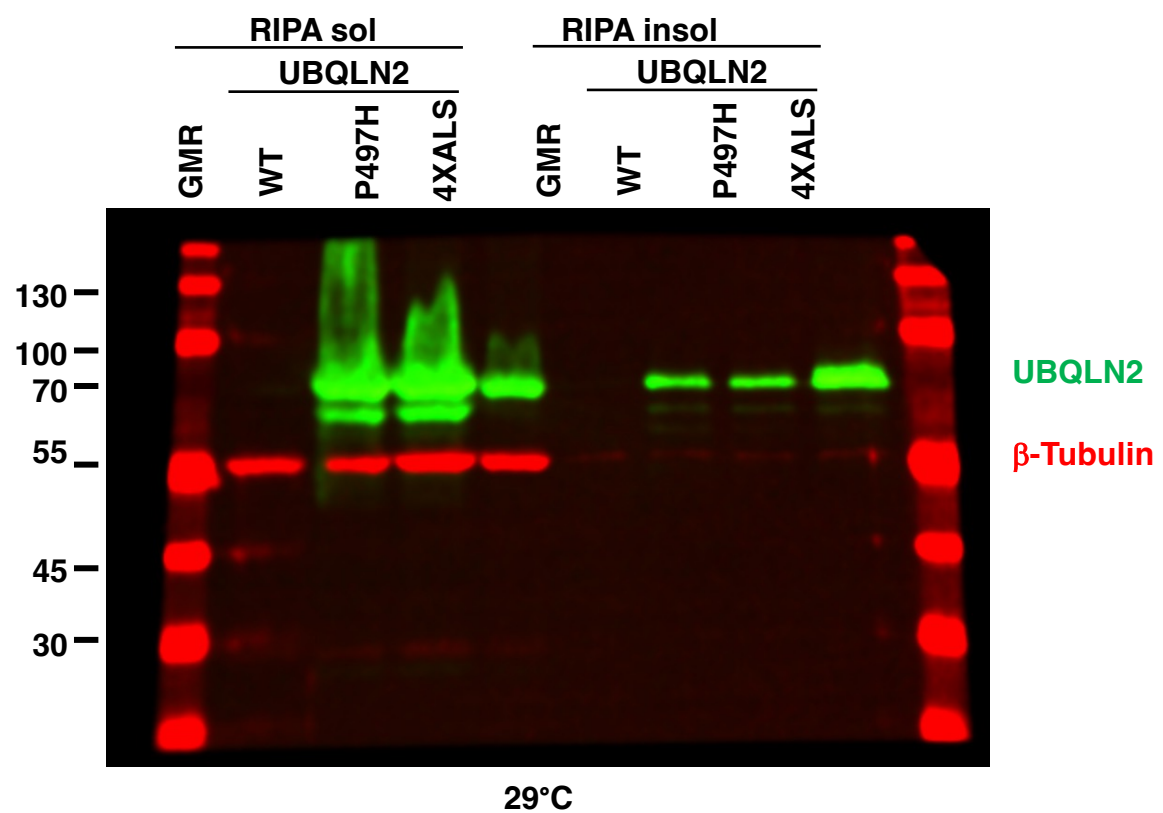

Supplement: fig1-figsupp1-data1 [file Figure 1-Figure supplement 1-2 uncropped.pdf › Figure 1-Figure supplement 1 (A,B)/Figure 1-Figure supplement 1-2 uncropped.pdf]

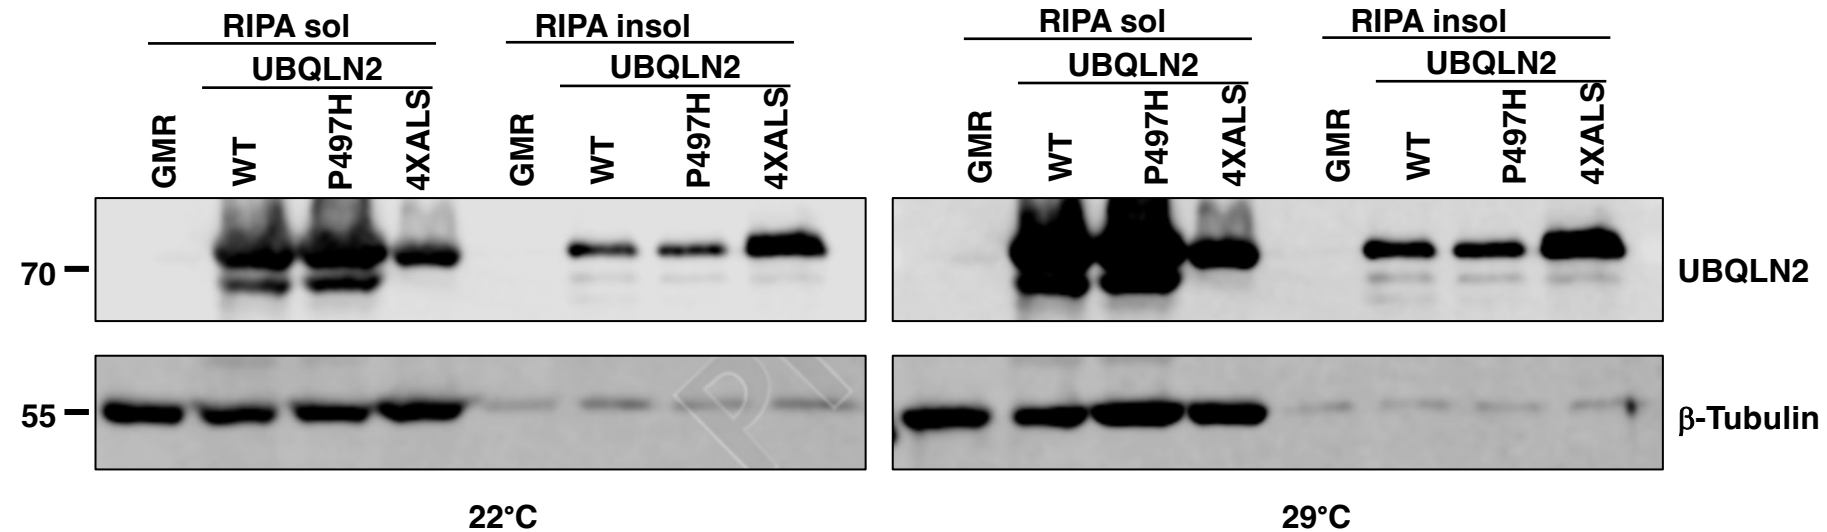

Supplement: fig1-figsupp1-data1 [file Figure 1-Figure supplement 1-2.pdf › Figure 1-Figure supplement 1 (A,B)/Figure 1-Figure supplement 1-2.pdf]

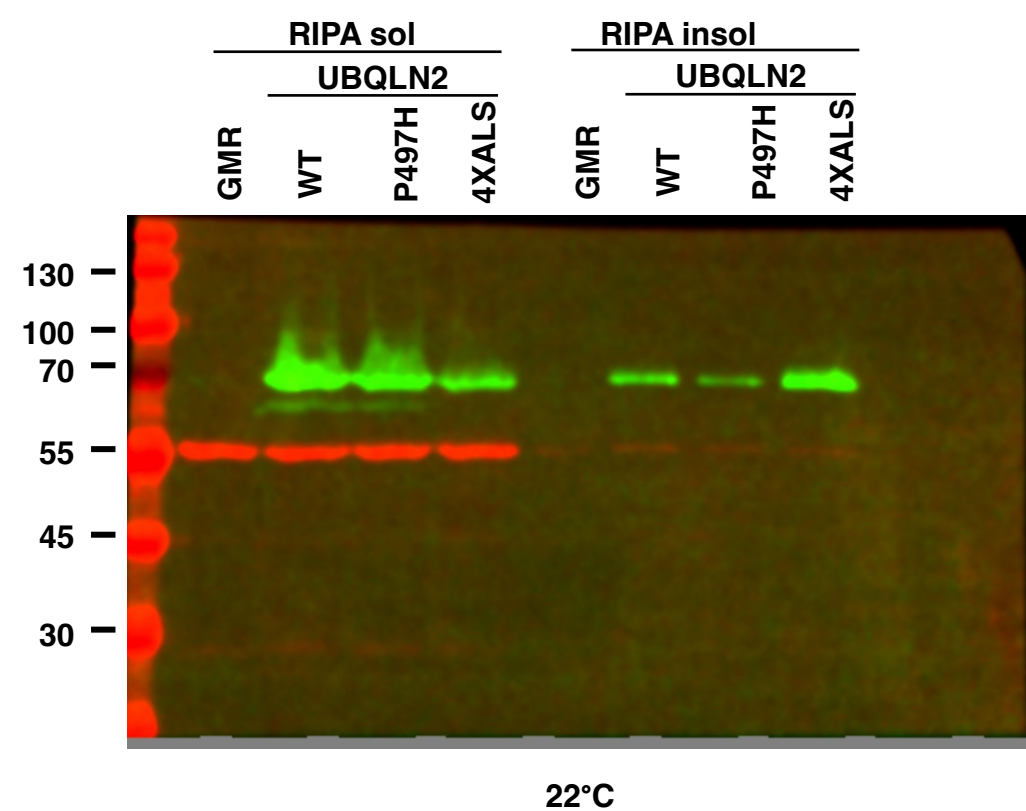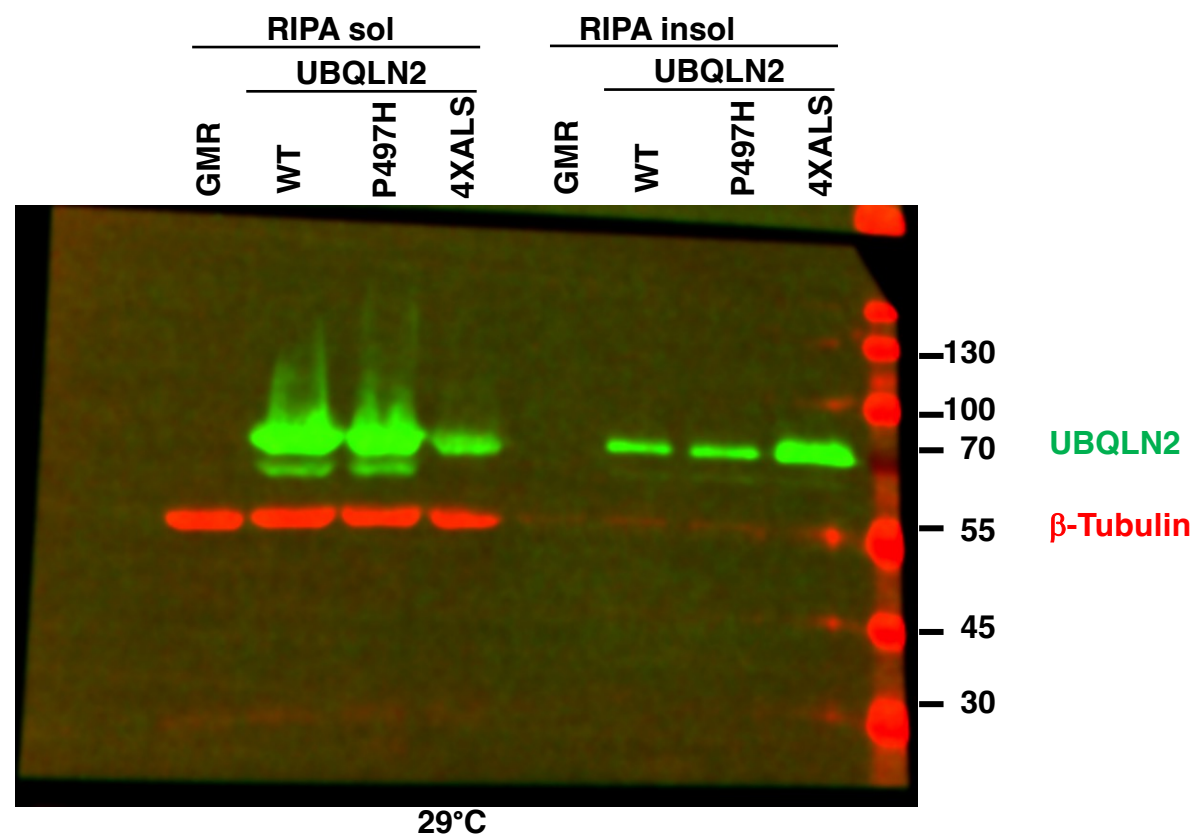

Supplement: fig1-figsupp1-data1 [file Figure 1-Figure supplement 1-3 uncropped.pdf › Figure 1-Figure supplement 1 (A,B)/Figure 1-Figure supplement 1-3 uncropped.pdf]

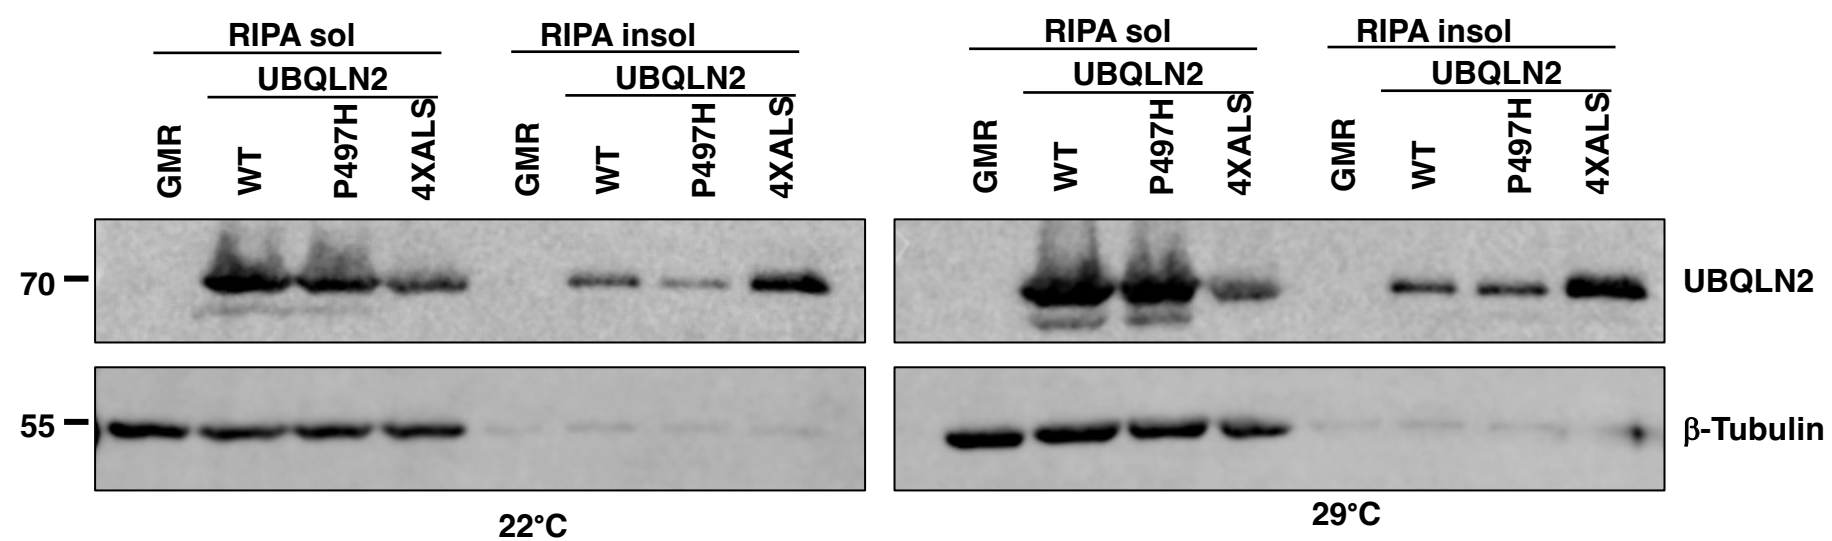

Supplement: fig1-figsupp1-data1 [file Figure 1-Figure supplement 1-3.pdf › Figure 1-Figure supplement 1 (A,B)/Figure 1-Figure supplement 1-3.pdf]

shLuci

shRab5

GMR

WT

P497H

4XALS

GMR

WT

P497H

4XALS

UBQLN2

$\beta$ -tubulin

180

130

100

70

55

40

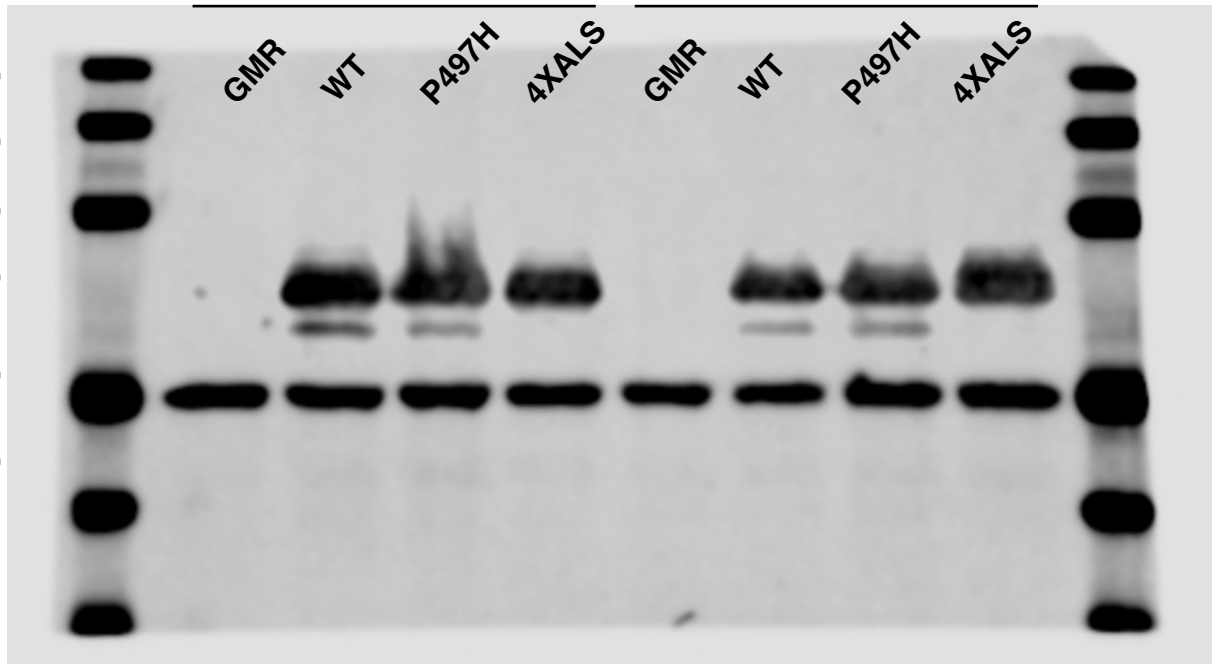

Supplement: fig2-figsupp1-data1 [file Figure 2-Figure supplement 1 (D,E)-1 uncropped.pdf › Figure 2-Figure supplement 1 source data/Figure 2-Figure supplement 1 (D,E)/Figure 2-Figure supplement 1 (D,E)-1 uncropped.pdf]

**shLuci**

**shRab5**

**GMR**

**WT**

**P497H**

**4XALS**

**GMR**

**WT**

**P497H**

**4XALS**

70

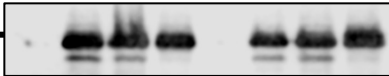

**UBQLN2**

55

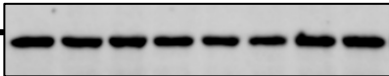

**$\beta$ -tubulin**

Supplement: fig2-figsupp1-data1 [file Figure 2-Figure supplement 1 (D,E)-1.pdf › Figure 2-Figure supplement 1 source data/Figure 2-Figure supplement 1 (D,E)/Figure 2-Figure supplement 1 (D,E)-1.pdf]

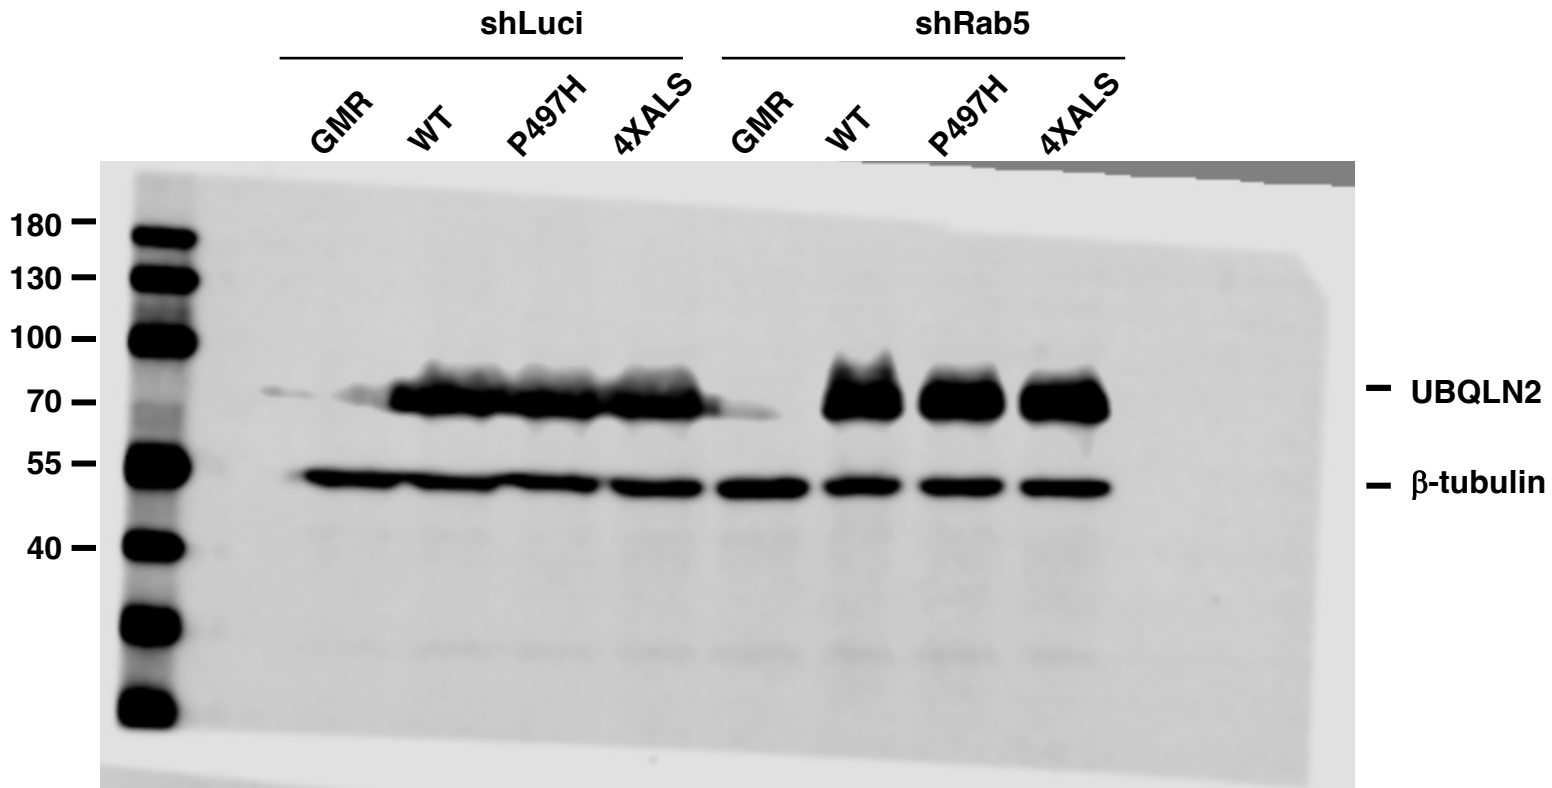

Supplement: fig2-figsupp1-data1 [file Figure 2-Figure supplement 1 (D,E)-2 uncropped.pdf › Figure 2-Figure supplement 1 source data/Figure 2-Figure supplement 1 (D,E)/Figure 2-Figure supplement 1 (D,E)-2 uncropped.pdf]

**shLuci**

**shRab5**

**GMR**

**WT**

**P497H**

**4XALS**

**GMR**

**WT**

**P497H**

**4XALS**

70

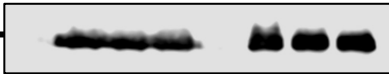

**UBQLN2**

55

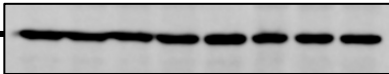

**$\beta$ -tubulin**

Supplement: fig2-figsupp1-data1 [file Figure 2-Figure supplement 1 (D,E)-2.pdf › Figure 2-Figure supplement 1 source data/Figure 2-Figure supplement 1 (D,E)/Figure 2-Figure supplement 1 (D,E)-2.pdf]

shLuci

shRab5

GMR

WT

P497H

4XALS

GMR

WT

P497H

4XALS

UBQLN2

 $\beta$ -tubulin

— 180

— 130

— 100

— 70

— 55

— 40

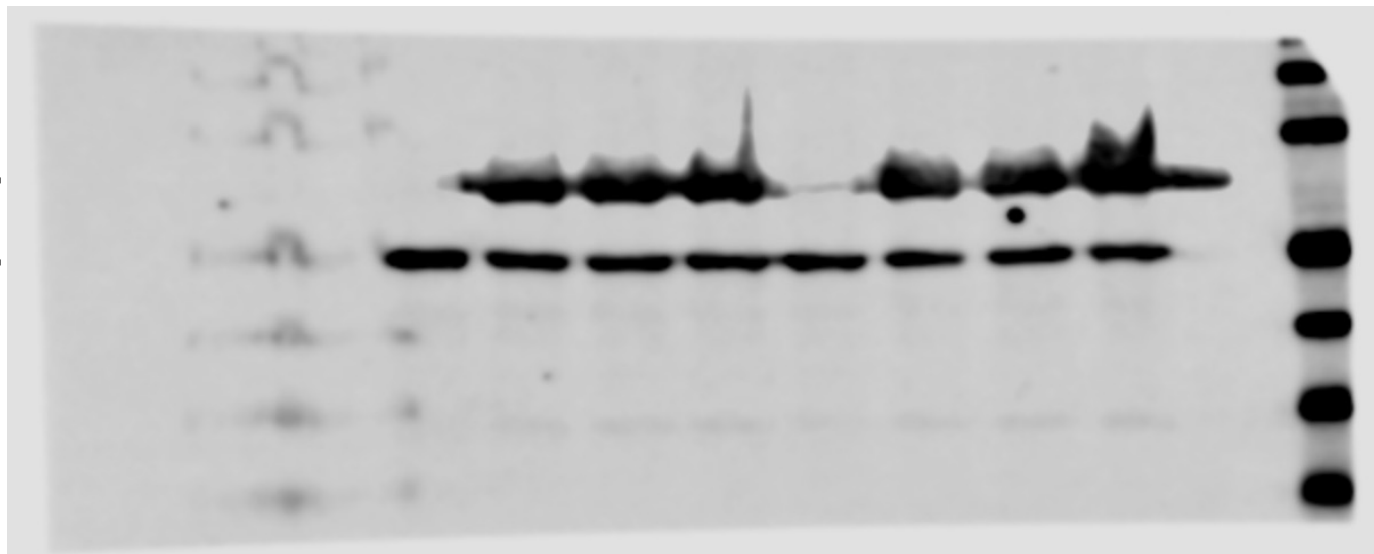

Supplement: fig2-figsupp1-data1 [file Figure 2-Figure supplement 1 (D,E)-3 uncropped.pdf › Figure 2-Figure supplement 1 source data/Figure 2-Figure supplement 1 (D,E)/Figure 2-Figure supplement 1 (D,E)-3 uncropped.pdf]

**shLuci**

**shRab5**

**GMR**

**WT**

**P497H**

**4XALS**

**GMR**

**WT**

**P497H**

**4XALS**

70

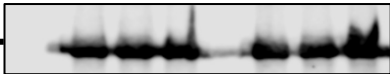

**UBQLN2**

55

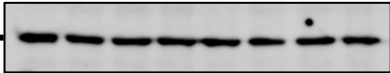

**$\beta$ -tubulin**

Supplement: fig2-figsupp1-data1 [file Figure 2-Figure supplement 1 (D,E)-3.pdf › Figure 2-Figure supplement 1 source data/Figure 2-Figure supplement 1 (D,E)/Figure 2-Figure supplement 1 (D,E)-3.pdf]

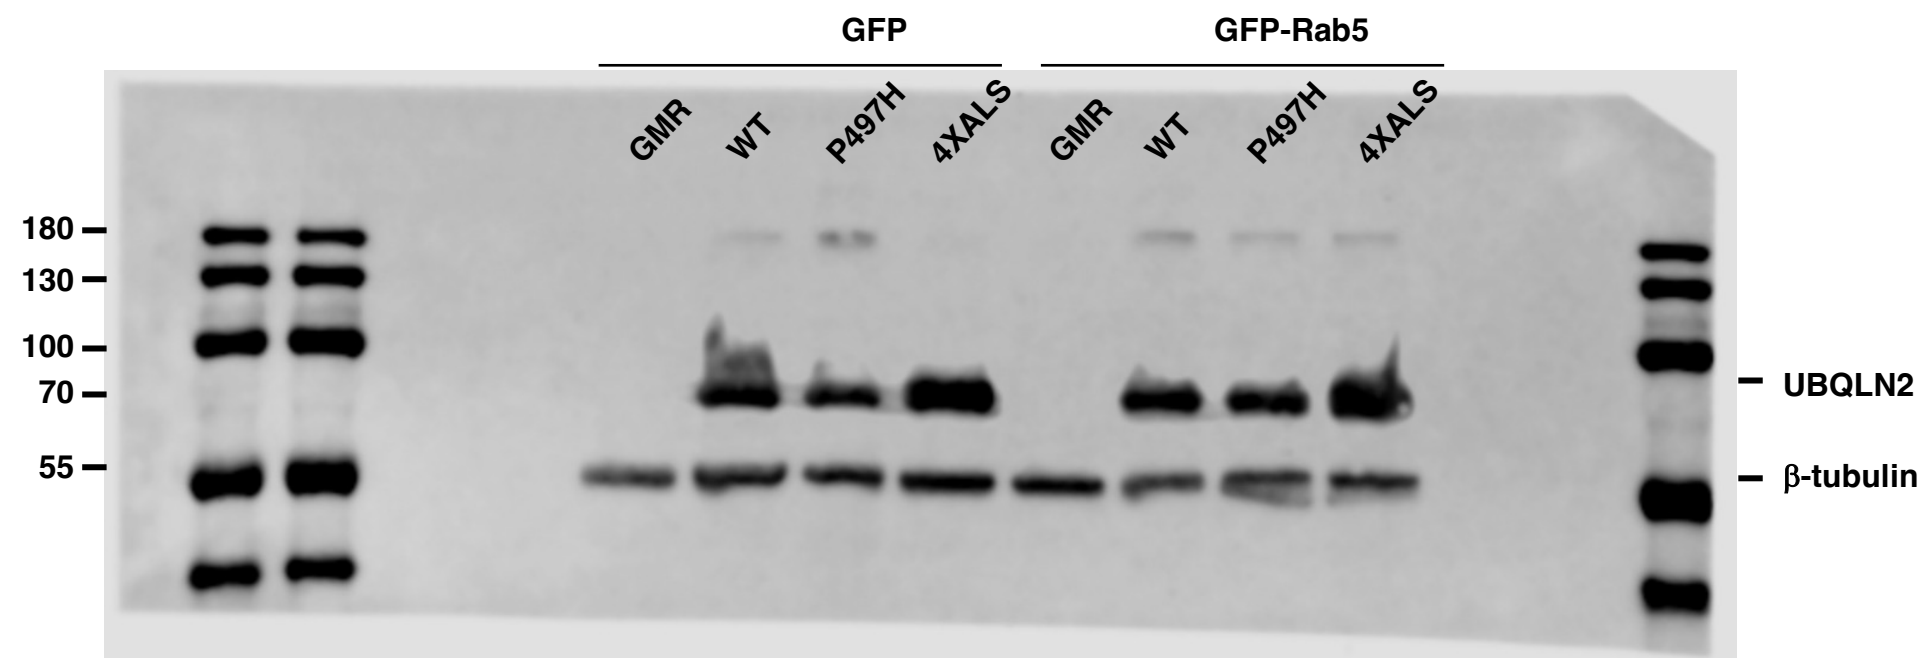

Supplement: fig2-figsupp1-data1 [file Figure 2-Figure supplement 1 (G,H)-1 uncropped.pdf › Figure 2-Figure supplement 1 source data/Figure 2-Figure supplement 1 (G,H)/Figure 2-Figure supplement 1 (G,H)-1 uncropped.pdf]

**GFP**

**GFP-Rab5**

**GMR**

**WT**

**P497H**

**4XALS**

**GMR**

**WT**

**P497H**

**4XALS**

70

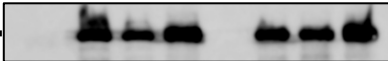

**UBQLN2**

55

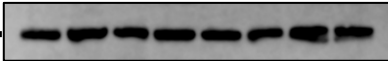

**$\beta$ -tubulin**

Supplement: fig2-figsupp1-data1 [file Figure 2-Figure supplement 1 (G,H)-1.pdf › Figure 2-Figure supplement 1 source data/Figure 2-Figure supplement 1 (G,H)/Figure 2-Figure supplement 1 (G,H)-1.pdf]

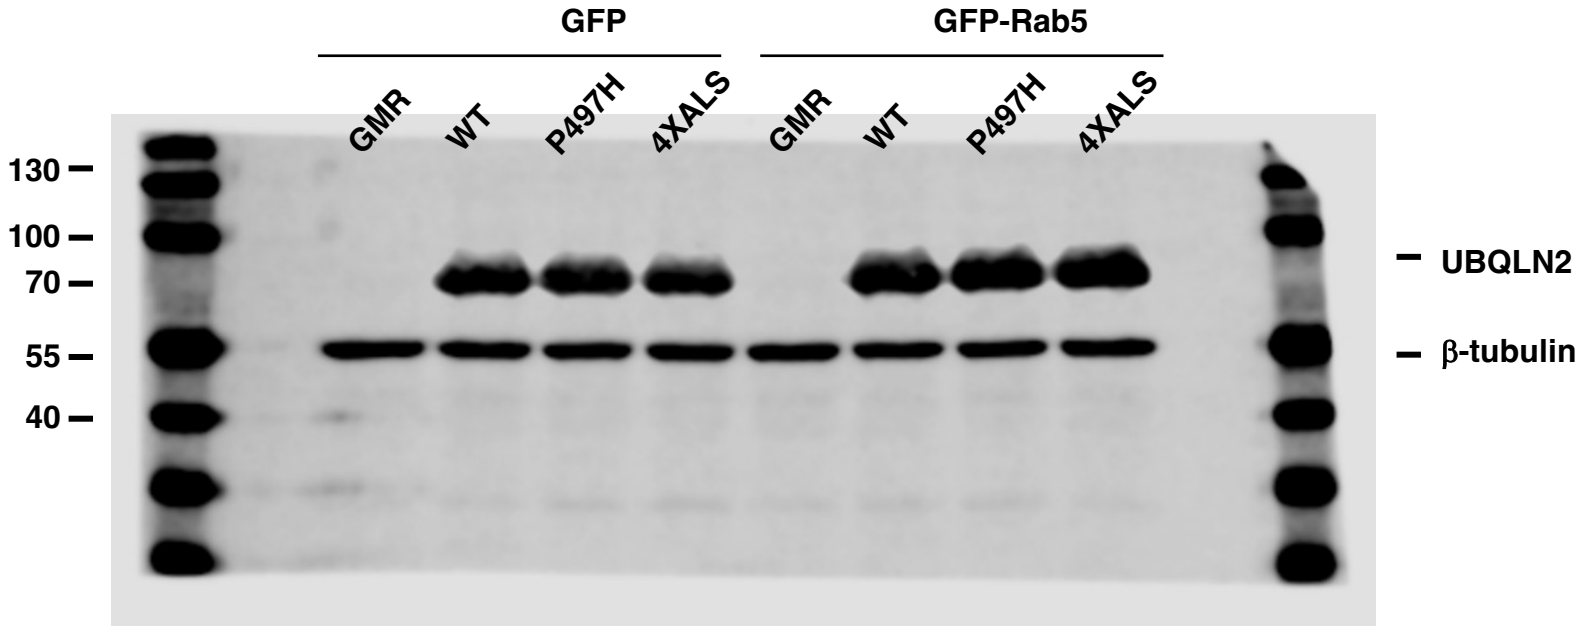

Supplement: fig2-figsupp1-data1 [file Figure 2-Figure supplement 1 (G,H)-2 uncropped.pdf › Figure 2-Figure supplement 1 source data/Figure 2-Figure supplement 1 (G,H)/Figure 2-Figure supplement 1 (G,H)-2 uncropped.pdf]

**GFP**

**GFP-Rab5**

**GMR**

**WT**

**P497H**

**4XALS**

**GMR**

**WT**

**P497H**

**4XALS**

70

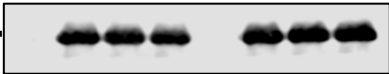

**UBQLN2**

55

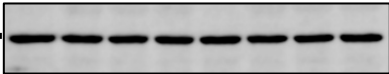

**$\beta$ -tubulin**

Supplement: fig2-figsupp1-data1 [file Figure 2-Figure supplement 1 (G,H)-2.pdf › Figure 2-Figure supplement 1 source data/Figure 2-Figure supplement 1 (G,H)/Figure 2-Figure supplement 1 (G,H)-2.pdf]

GFP

GFP-Rab5

GMR

WT

P497H

4XALS

GMR

WT

P497H

4XALS

— UBQLN2

—  $\beta$ -tubulin

180 —  
130 —  
100 —  
70 —  
55 —  
40 —

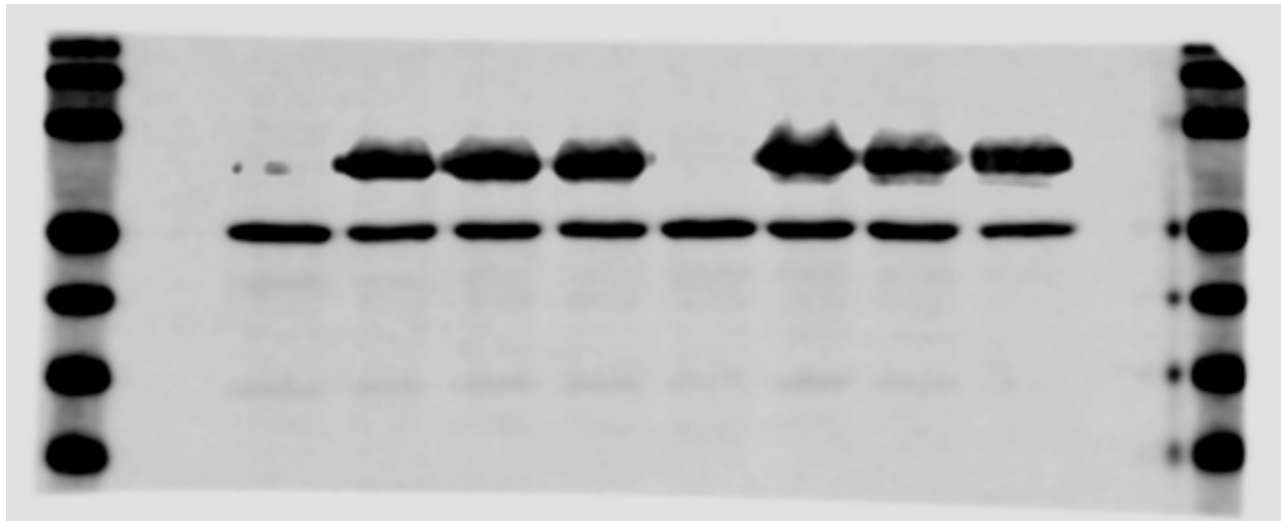

Supplement: fig2-figsupp1-data1 [file Figure 2-Figure supplement 1 (G,H)-3 uncropped.pdf › Figure 2-Figure supplement 1 source data/Figure 2-Figure supplement 1 (G,H)/Figure 2-Figure supplement 1 (G,H)-3 uncropped.pdf]

**GFP**

**GFP-Rab5**

**GMR**

**WT**

**P497H**

**4XALS**

**GMR**

**WT**

**P497H**

**4XALS**

70

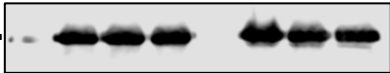

**UBQLN2**

55

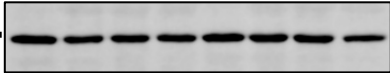

**$\beta$ -tubulin**

Supplement: fig2-figsupp1-data1 [file Figure 2-Figure supplement 1 (G,H)-3.pdf › Figure 2-Figure supplement 1 source data/Figure 2-Figure supplement 1 (G,H)/Figure 2-Figure supplement 1 (G,H)-3.pdf]

**GMR>UBQLN2<sup>4XALS</sup>/**

---

*lilli*<sup>17-2</sup>

**CyO**

**70**

—

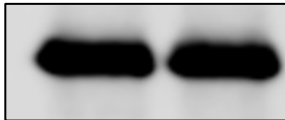

**UBQLN2**

**55**

—

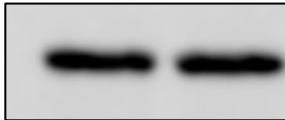

**$\beta$ -tubulin**

Supplement: fig2-figsupp2-data1 [file Figure 2-Figure supplement 2 (C)-1.pdf › Figure 2-Figure supplement 2 source data/Figure 2-Figure supplement 2 (C)-1.pdf]

**GMR>UBQLN2<sup>4XALS</sup>/**

*lilli*<sup>17-2</sup>

**CyO**

70 —

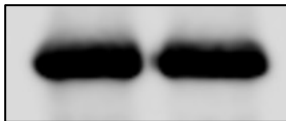

**UBQLN2**

55 —

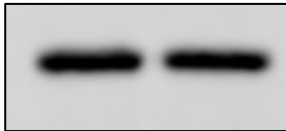

**$\beta$ -tubulin**

Supplement: fig2-figsupp2-data1 [file Figure 2-Figure supplement 2 (C)-2.pdf › Figure 2-Figure supplement 2 source data/Figure 2-Figure supplement 2 (C)-2.pdf]

**GMR>UBQLN2<sup>4XALS</sup>/**

*lilli*<sup>17-2</sup>

**CyO**

**70**

—

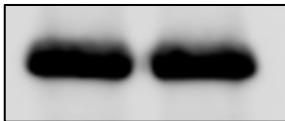

**UBQLN2**

**55**

—

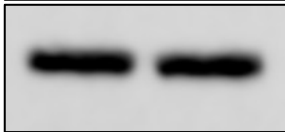

**$\beta$ -tubulin**

Supplement: fig2-figsupp2-data1 [file Figure 2-Figure supplement 2 (C)-3.pdf › Figure 2-Figure supplement 2 source data/Figure 2-Figure supplement 2 (C)-3.pdf]

**GMR>UBQLN2<sup>4XALS</sup>**

ED2426

CyO

BSC346

CyO

CyO

Unc-5<sup>3</sup>

shLuci

shUnc-5

130

100

70

55

45

30

UBQLN2

β-tubulin

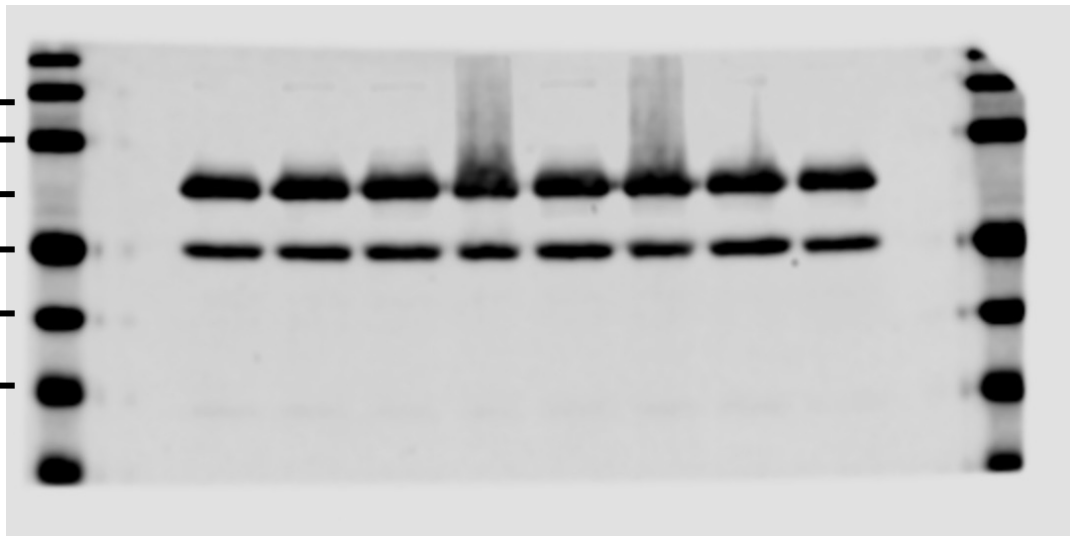

Supplement: fig3-data1 [file Figure 3 (D,E)-1 uncropped.pdf › Figure 3 (D,E) source data/Figure 3 (D,E)-1 uncropped.pdf]

# GMR>UBQLN2<sup>4XALS</sup>

ED2426

CyO

BSC346

CyO

CyO

Unc-5<sup>3</sup>

shLuci

shUnc-5

70

—

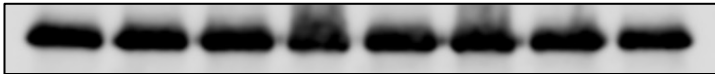

UBQLN2

55

—

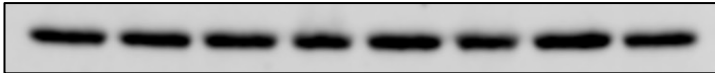

$\beta$ -tubulin

Supplement: fig3-data1 [file Figure 3 (D,E)-1.pdf › Figure 3 (D,E) source data/Figure 3 (D,E)-1.pdf]

GMR>UBQLN2<sup>4XALS</sup>

ED2426

CyO

BSC346

CyO

CyO

Unc-53

shLuci

shUnc-5

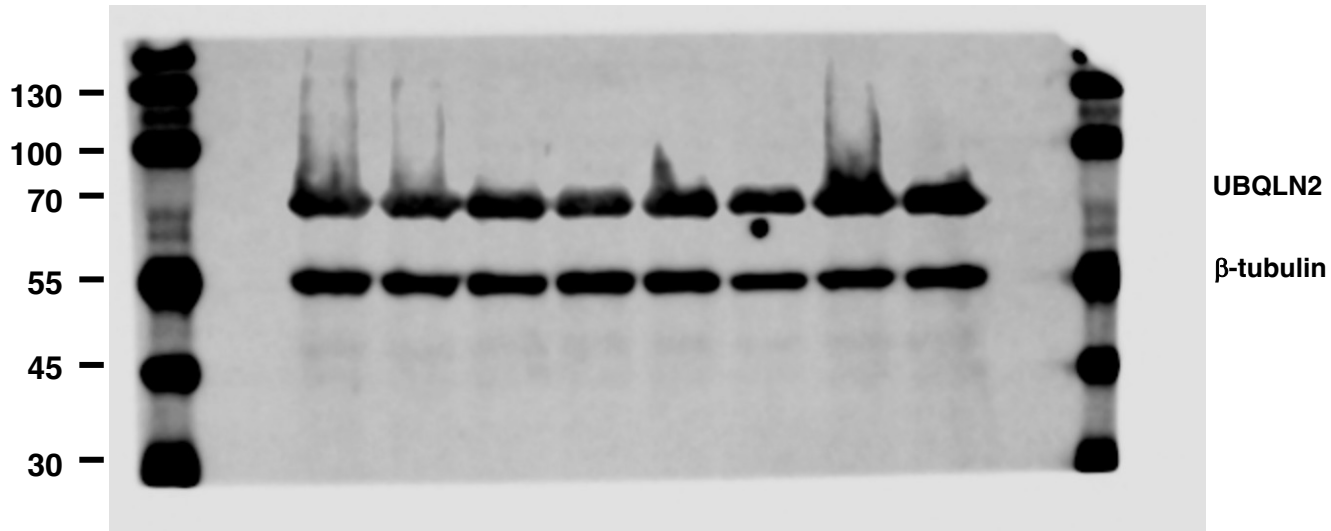

Supplement: fig3-data1 [file Figure 3 (D,E)-2 uncropped.pdf › Figure 3 (D,E) source data/Figure 3 (D,E)-2 uncropped.pdf]

**GMR>UBQLN2<sup>4XALS</sup>**

ED2426

CyO

BSC346

CyO

CyO

Unc-5<sup>3</sup>

shLuci

shUnc-5

70

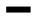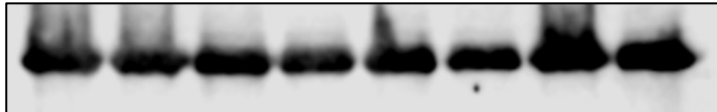

**UBQLN2**

55

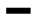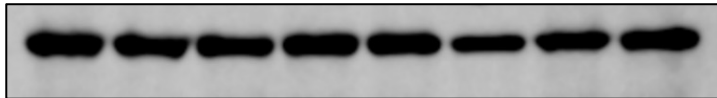

**β-tubulin**

Supplement: fig3-data1 [file Figure 3 (D,E)-2.pdf › Figure 3 (D,E) source data/Figure 3 (D,E)-2.pdf]

GMR>UBQLN2<sup>4XALS</sup>

ED2426

CyO

BSC346

CyO

CyO

Unc-5<sup>3</sup>

shLuci

shUnc-5

130

100

70

55

45

30

UBQLN2

β-tubulin

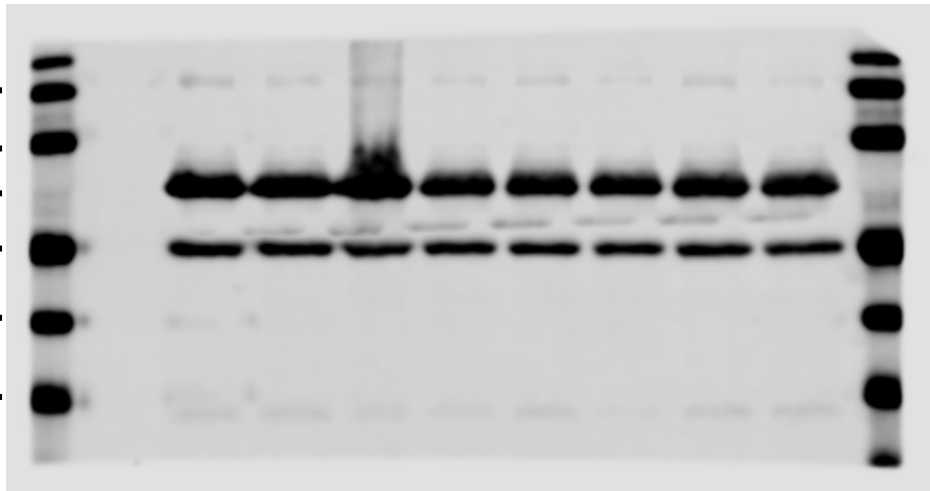

Supplement: fig3-data1 [file Figure 3 (D,E)-3 uncropped.pdf › Figure 3 (D,E) source data/Figure 3 (D,E)-3 uncropped.pdf]

**GMR>UBQLN2<sup>4XALS</sup>**

**ED2426**

**CyO**

**BSC346**

**CyO**

**CyO**

**Unc-5<sup>3</sup>**

**shLuci**

**shUnc-5**

**70**

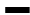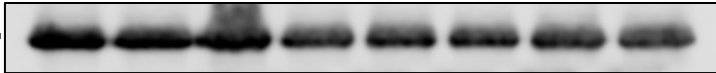

**UBQLN2**

**55**

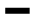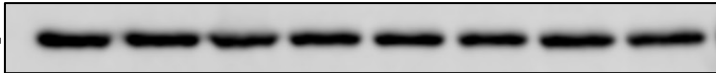

**β-tubulin**

Supplement: fig3-data1 [file Figure 3 (D,E)-3.pdf › Figure 3 (D,E) source data/Figure 3 (D,E)-3.pdf]

GMR>UBQLN2<sup>4XALS</sup>

GMR>UBQLN2<sup>4XALS</sup>

mCherry  
Luci  
Beat-1b  
Beat-1c

mCherry  
Luci  
Beat-1b  
Beat-1c

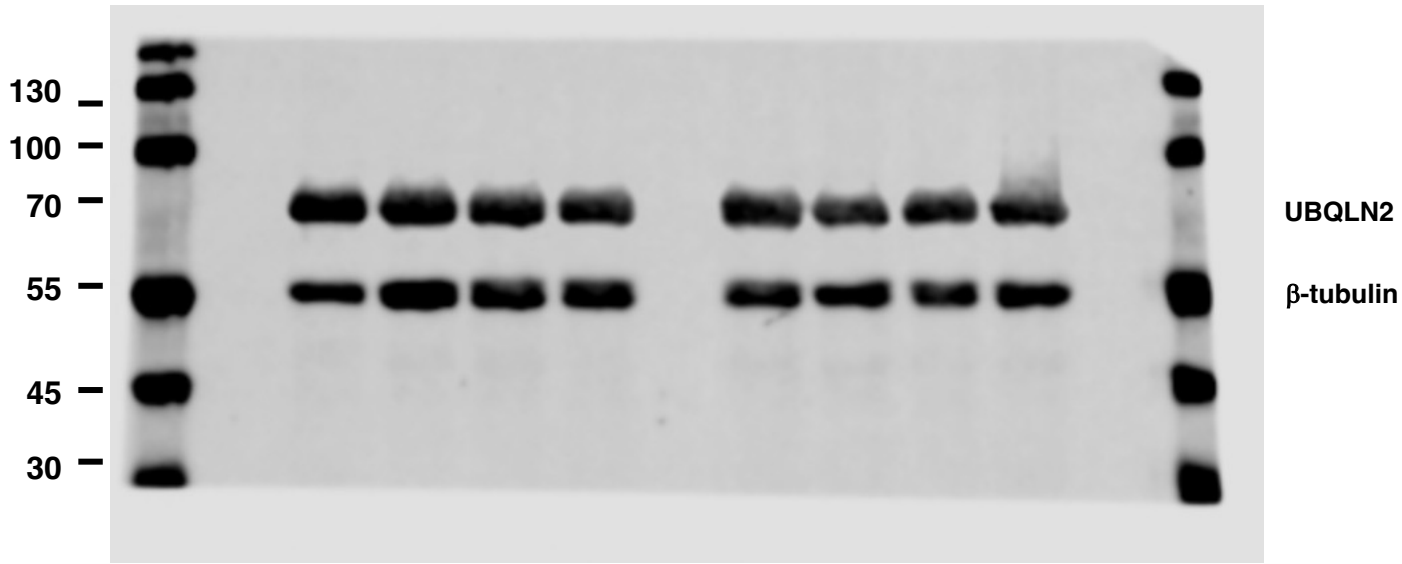

Supplement: fig5-data1 [file Figure 5(E,F)-1,2-uncropped.pdf › Figure 5 source data/Figure 5(E,F) source data/Figure 5(E,F)-1,2-uncropped.pdf]

# GMR>UBQLN2<sup>4XALS</sup>

mCherry  
Luci  
Beat-1b  
Beat-1c

70

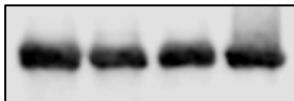

$\alpha$ -UBQLN2

55

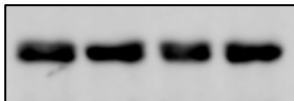

$\alpha$ - $\beta$  tubulin

Supplement: fig5-data1 [file Figure 5(E,F)-1.pdf › Figure 5 source data/Figure 5(E,F) source data/Figure 5(E,F)-1.pdf]

# GMR>UBQLN2<sup>4XALS</sup>

mCherry

Luci

Beat-1b

Beat-1c

70

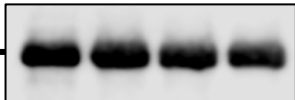

$\alpha$ -UBQLN2

55

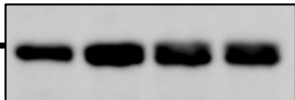

$\alpha$ - $\beta$  tubulin

Supplement: fig5-data1 [file Figure 5(E,F)-2.pdf › Figure 5 source data/Figure 5(E,F) source data/Figure 5(E,F)-2.pdf]

Figure 8E

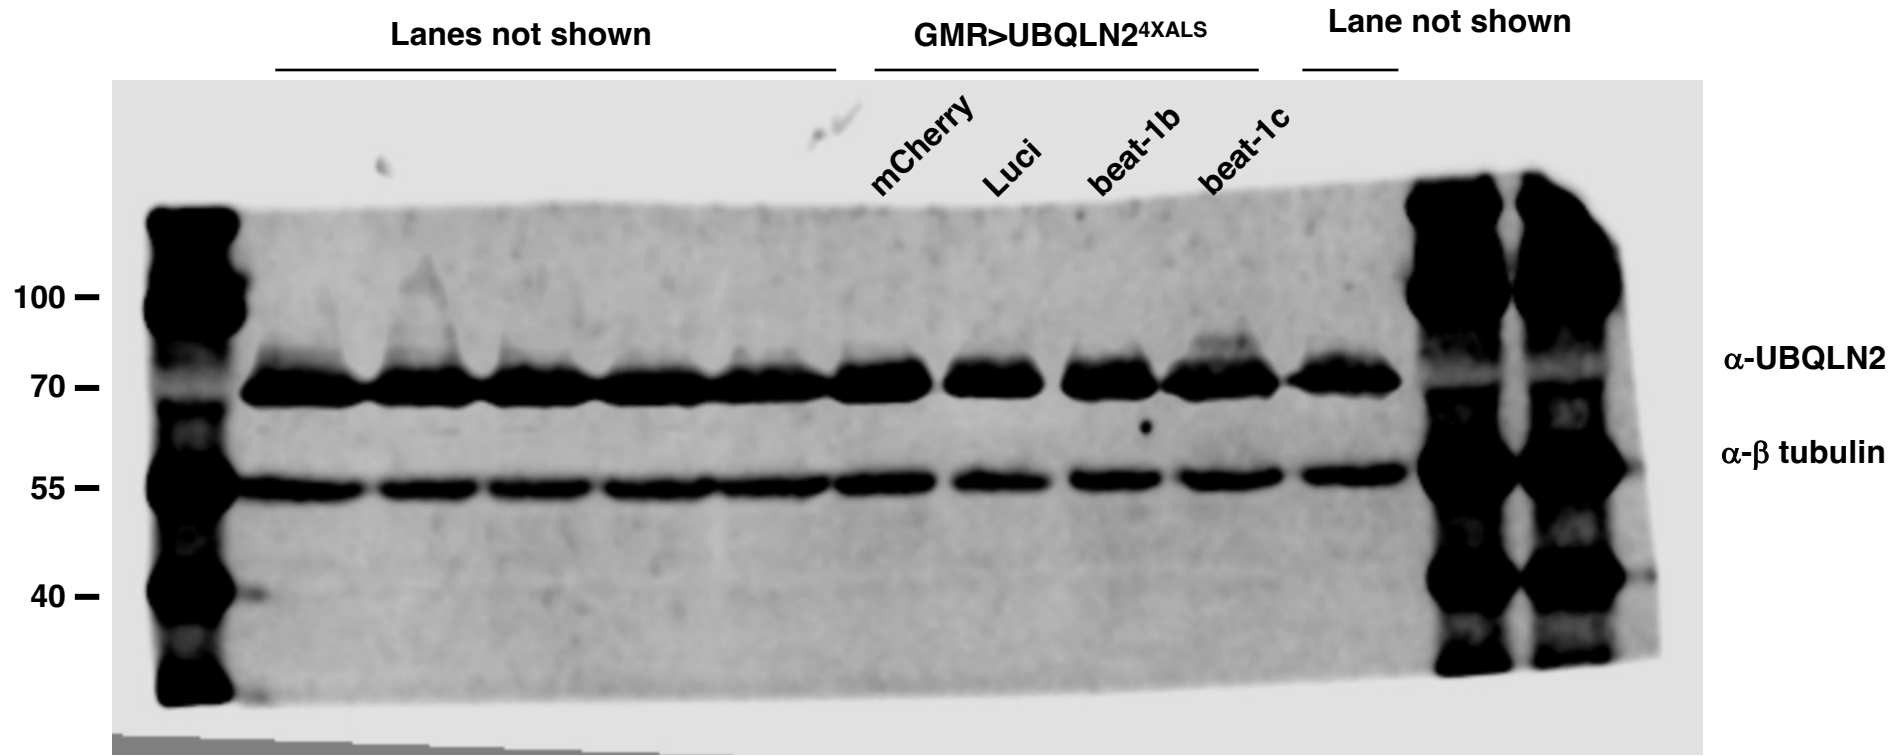

Supplement: fig5-data1 [file Figure 5(E,F)-3-uncropped.pdf › Figure 5 source data/Figure 5(E,F) source data/Figure 5(E,F)-3-uncropped.pdf]

# GMR>UBQLN2<sup>4XALS</sup>

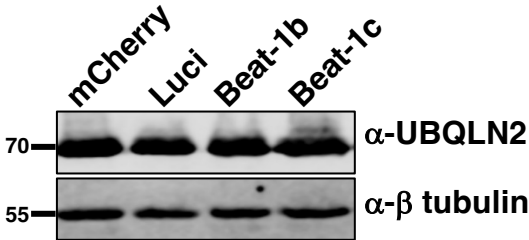

Supplement: fig5-data1 [file Figure 5(E,F)-3.pdf › Figure 5 source data/Figure 5(E,F) source data/Figure 5(E,F)-3.pdf]

Figure 8C

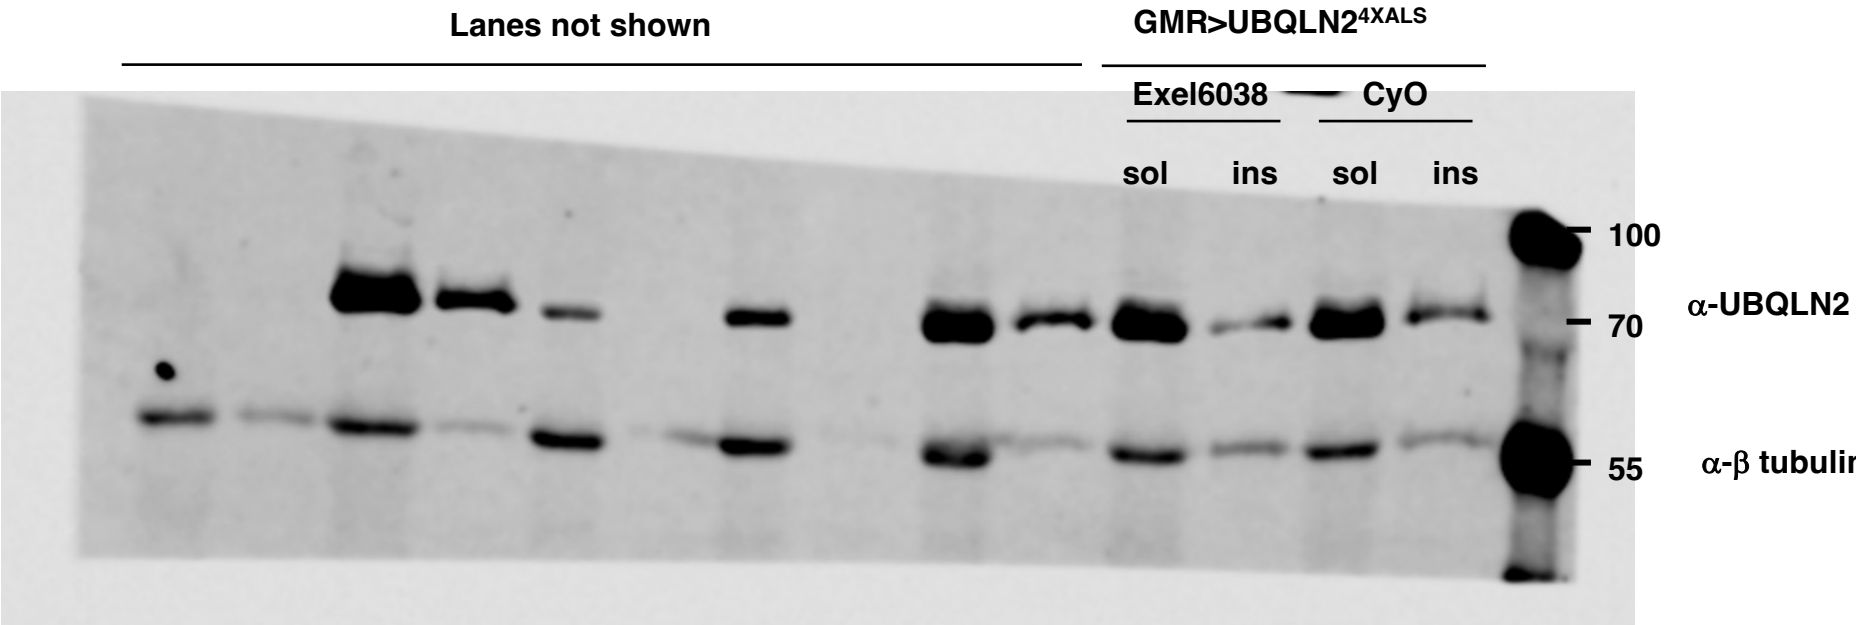

Supplement: fig5-data1 [file Figure 5C-uncropped.pdf › Figure 5 source data/Figure 5C source data/Figure 5C-uncropped.pdf]

100

70

55

45

35

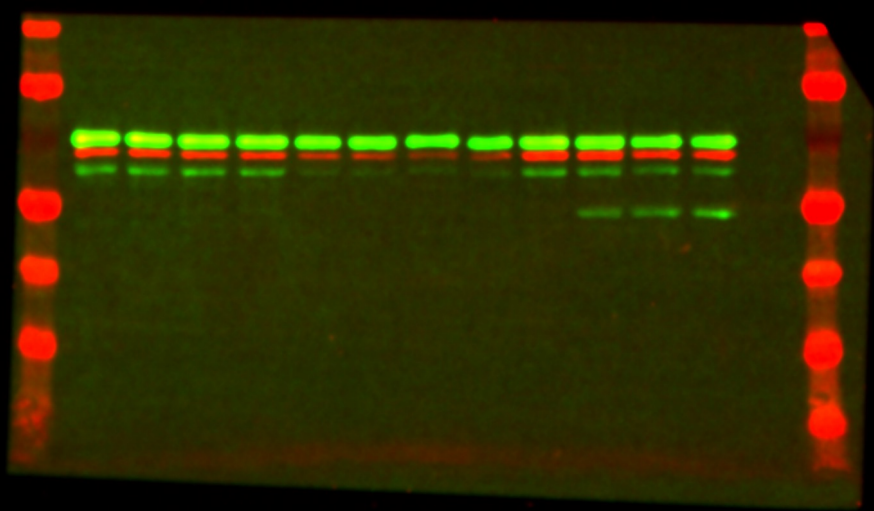

Supplement: fig6-data1 [file elife-84382-fig6-data1-v2.zip]

iPSC sol (TX-100)

iPSC pellet (TX-100)

WT P497H 2XALS I498X 4XALS 4XALS (C1)  
WT P497H 2XALS I498X 4XALS 4XALS (C2)

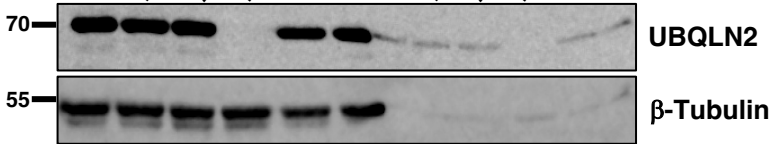

Supplement: fig6-data1 [file elife-84382-fig6-data1-v2.zip]

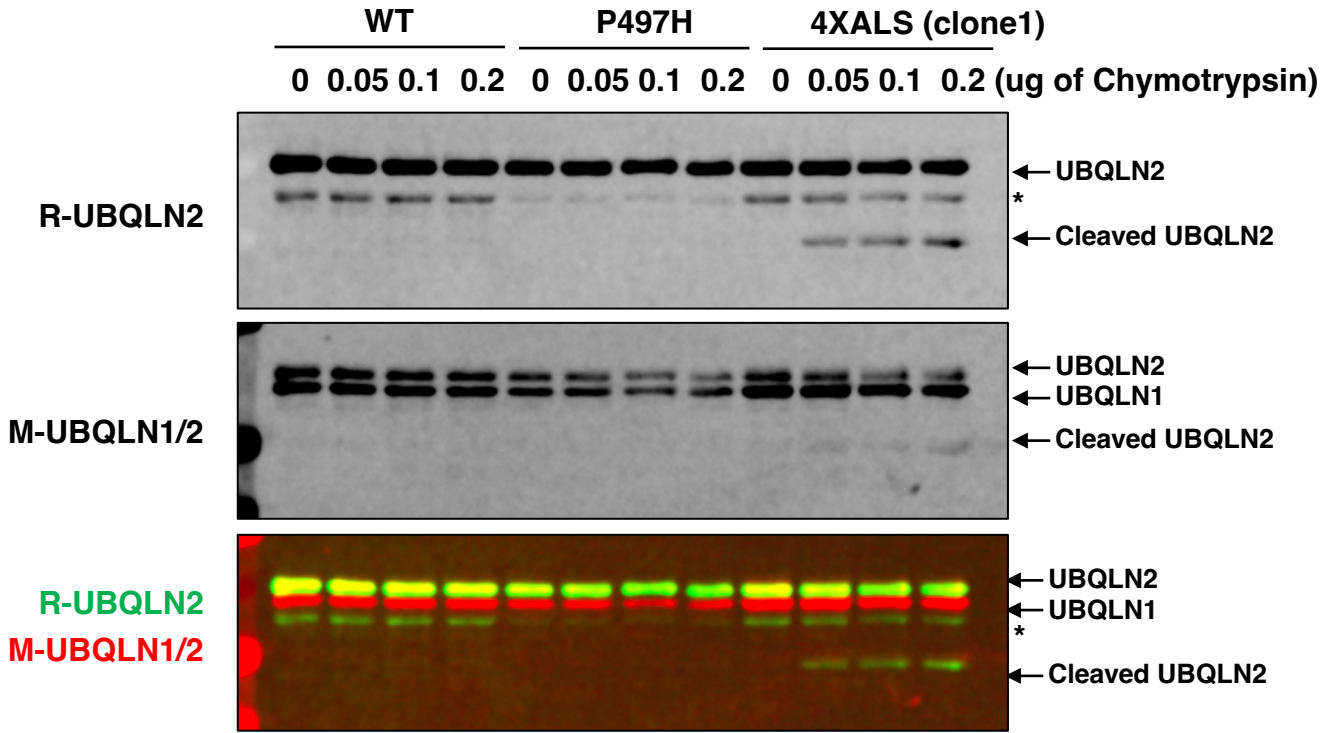

Supplement: fig6-data1 [file elife-84382-fig6-data1-v2.zip]

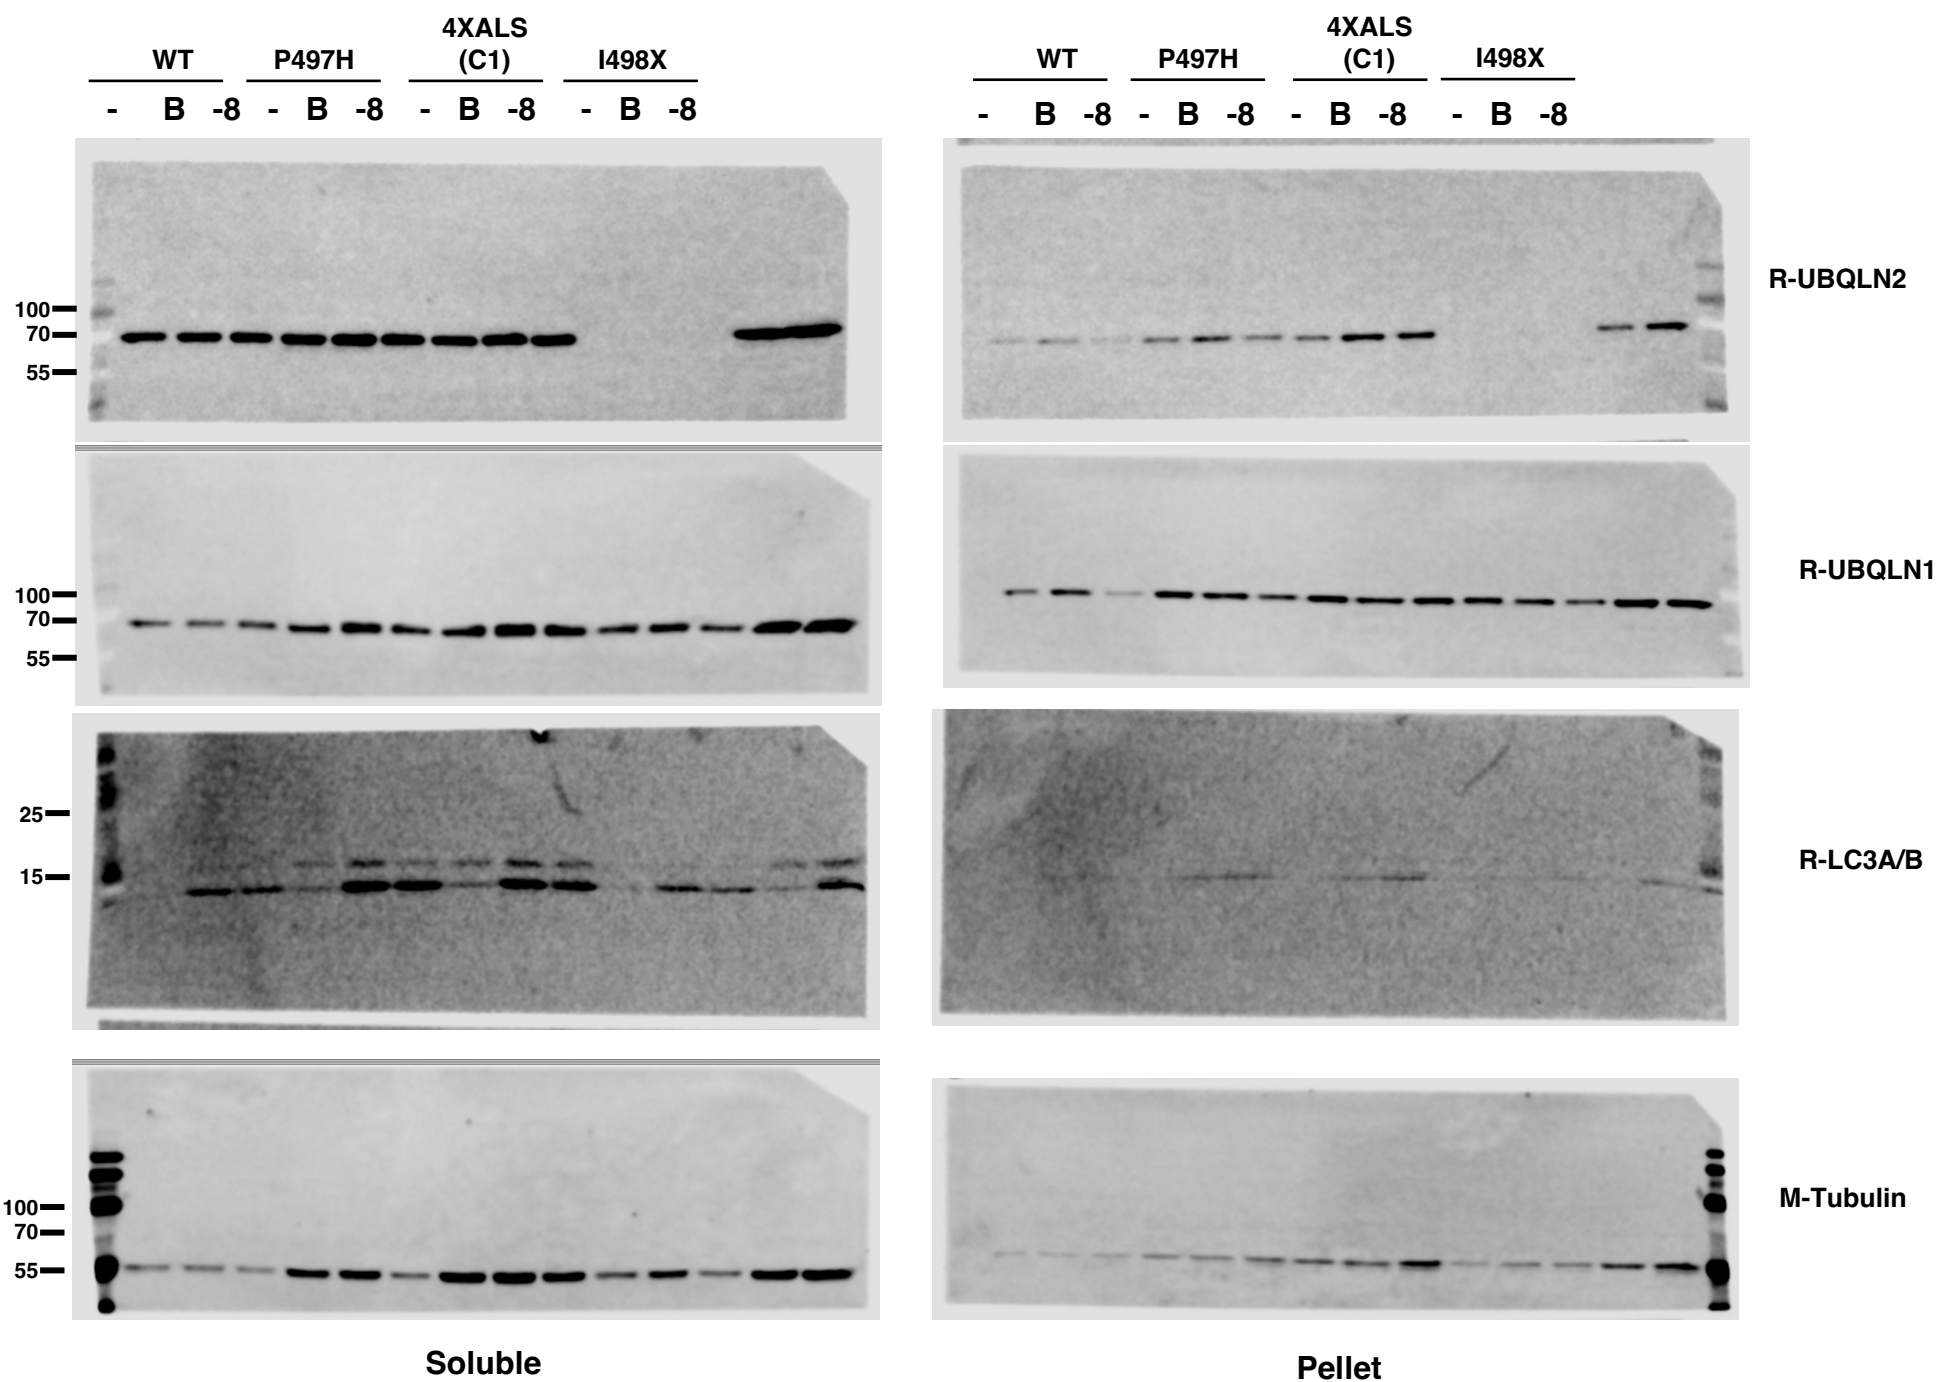

Supplement: fig6-data1 [file elife-84382-fig6-data1-v2.zip]

| iPSC sol (TX-100) |       |       |       |            | iPSC pellet (TX-100) |       |       |       |            |            |
|-------------------|-------|-------|-------|------------|----------------------|-------|-------|-------|------------|------------|
| WT                | P497H | 2XALS | I498X | 4XALS (C1) | WT                   | P497H | 2XALS | I498X | 4XALS (C1) | 4XALS (C2) |

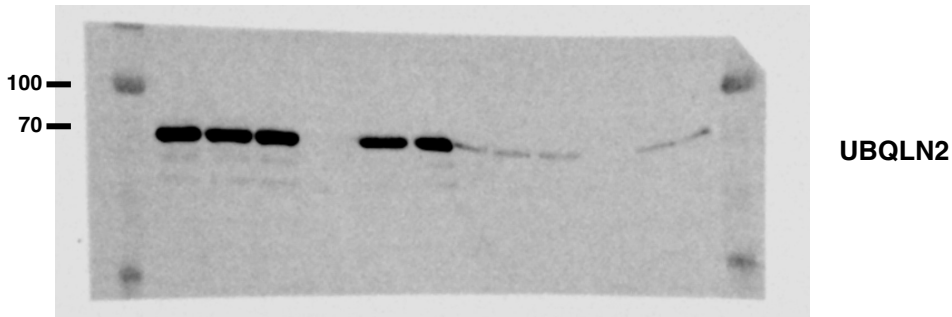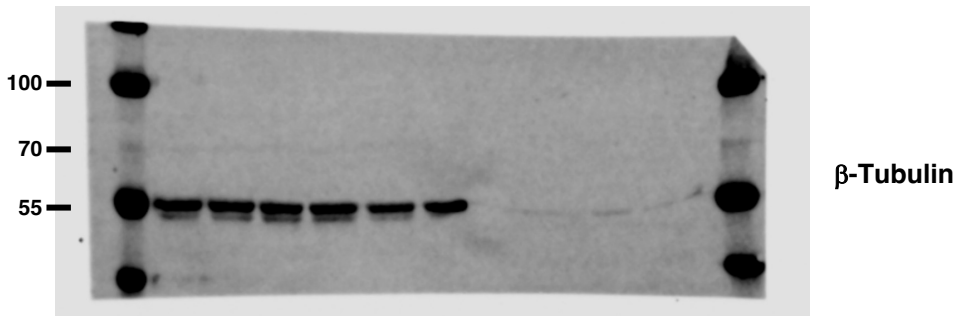

Supplement: fig6-data1 [file elife-84382-fig6-data1-v2.zip]

| WT |   |    | P497H |   |    | 4XALS C1 |   |    |
|----|---|----|-------|---|----|----------|---|----|
| -  | B | -8 | -     | B | -8 | -        | B | -8 |

| WT |   |    | P497H |   |    | 4XALS C1 |   |    |
|----|---|----|-------|---|----|----------|---|----|
| -  | B | -8 | -     | B | -8 | -        | B | -8 |

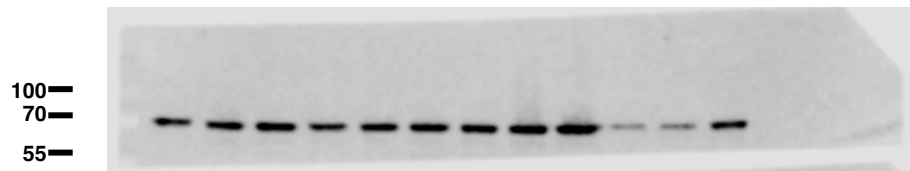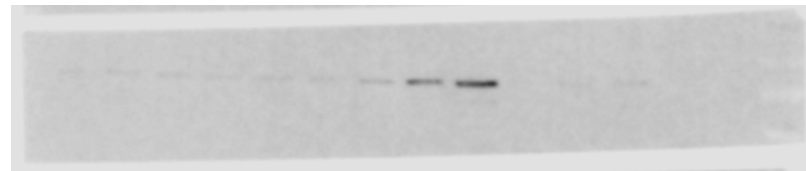

R-UBQLN2

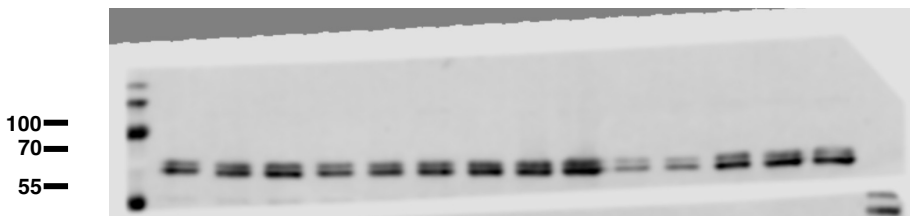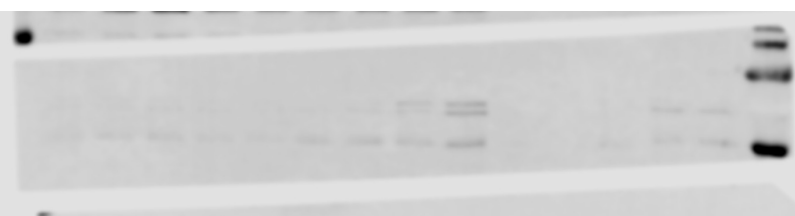

M-UBQLN1/2

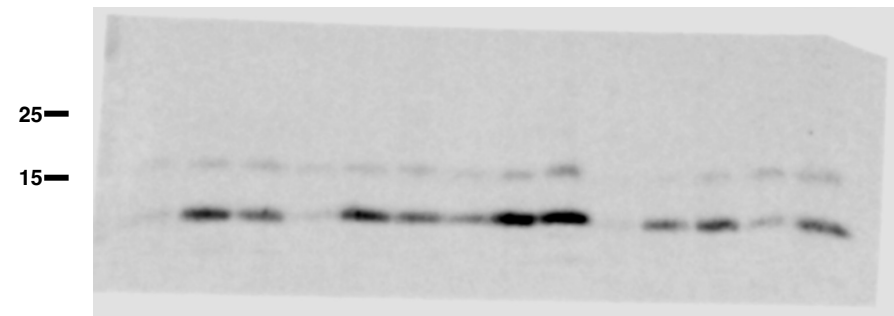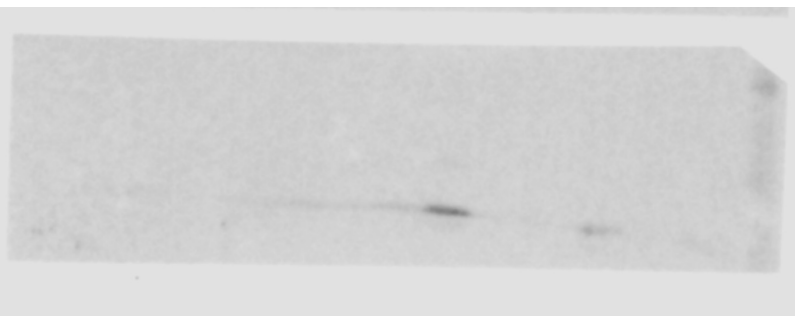

R-LC3A/B

Soluble

Pellet

Supplement: fig6-data1 [file elife-84382-fig6-data1-v2.zip]

**iPSC sol (TX-100)**

**iPSC pellet (TX-100)**

**WT** **P497H** **2XALS** **4XALS** **1498X**  
**(C1)**

**WT** **P497H** **2XALS** **4XALS** **1498X**  
**(C1)**

**70**

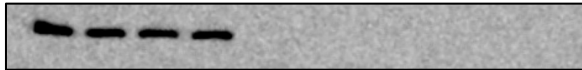

**UBQLN2**

**100**

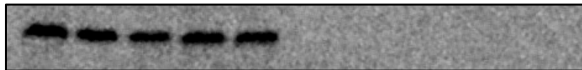

**PSMD1**

Supplement: fig6-data1 [file elife-84382-fig6-data1-v2.zip]

iPSC sol (TX-100)

iPSC pellet (TX-100)

WT P497H 2XALS 4XALS (C1) I498X

WT P497H 2XALS 4XALS (C1) I498X

70

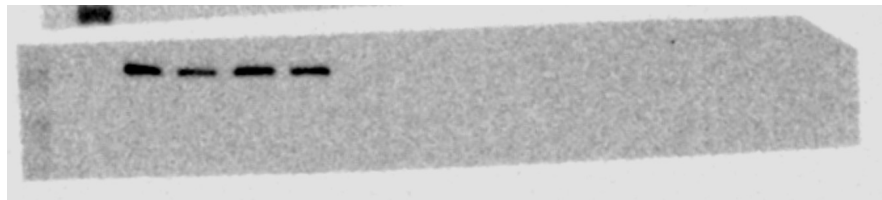

UBQLN2

100

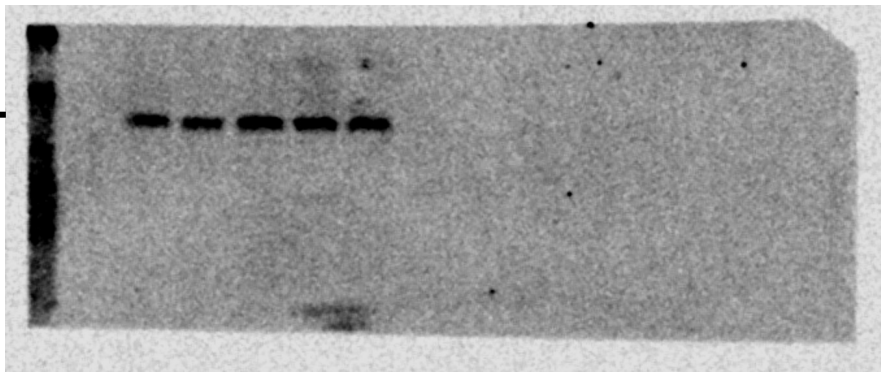

PSMD1

Supplement: fig6-data1 [file elife-84382-fig6-data1-v2.zip]

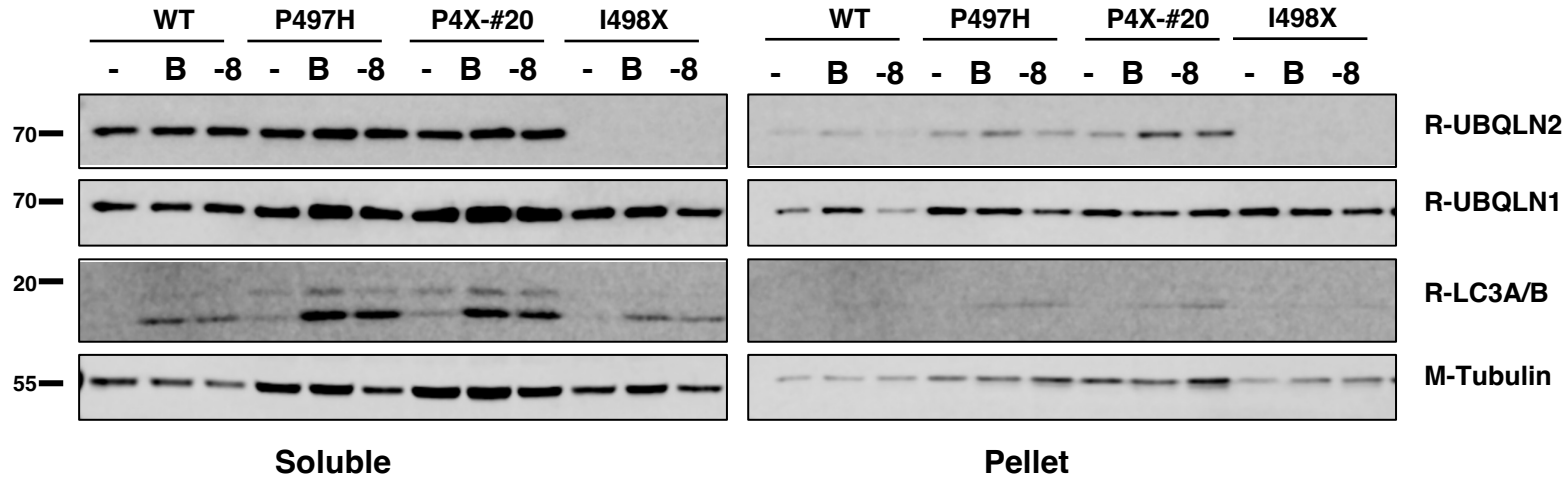

Supplement: fig6-data1 [file elife-84382-fig6-data1-v2.zip]

100

70

55

45

35

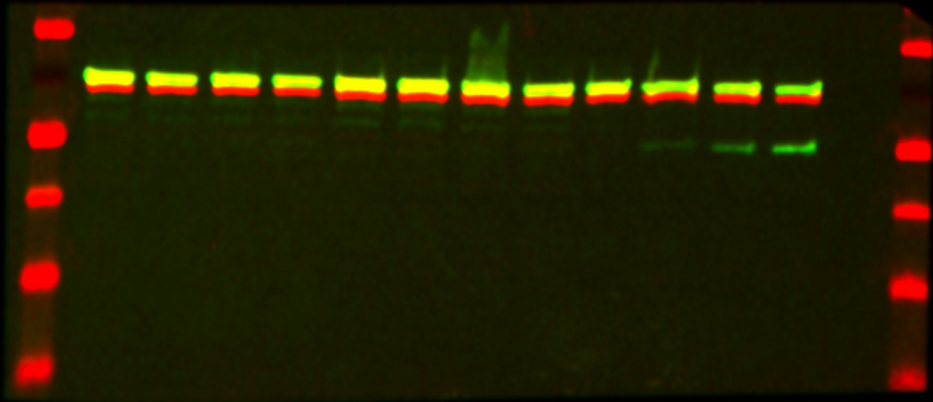

Supplement: fig6-data1 [file elife-84382-fig6-data1-v2.zip]

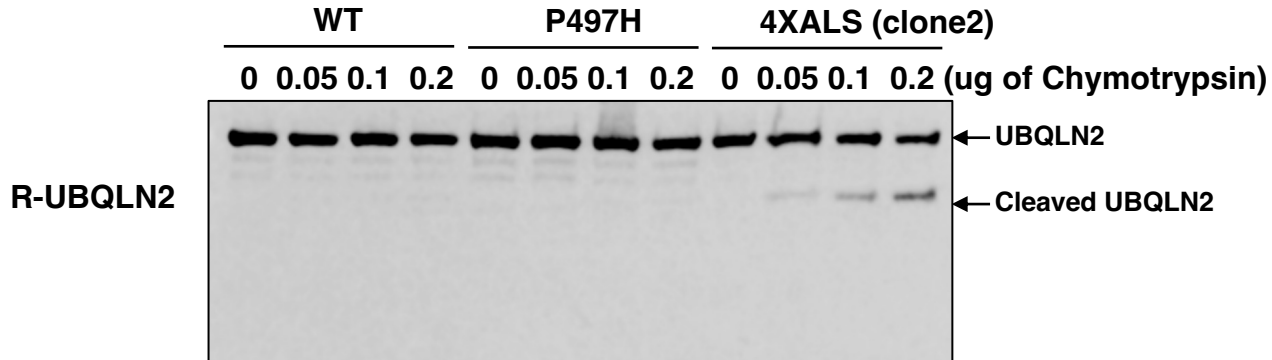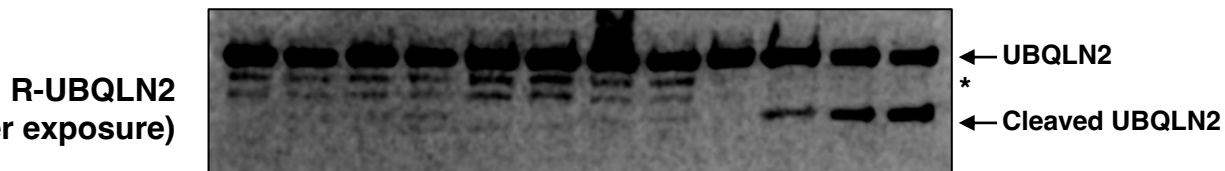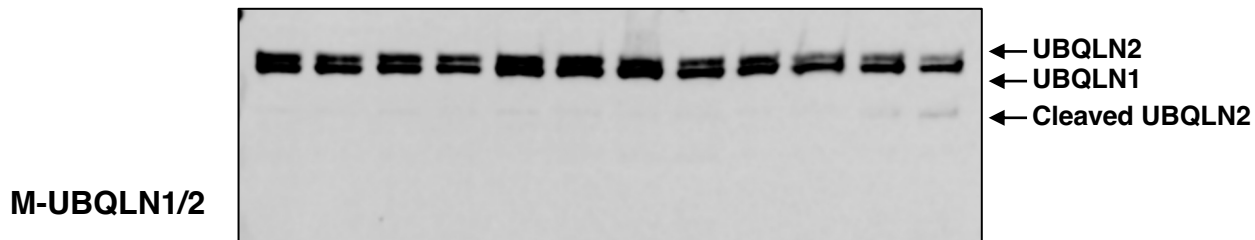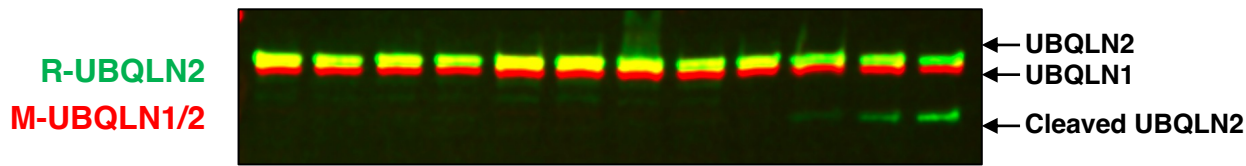

Supplement: fig6-data1 [file elife-84382-fig6-data1-v2.zip]

iPSC sol (TX-100)

iPSC pellet (TX-100)

WT P497H 2XALS 4XALS (C1) I498X

WT P497H 2XALS 4XALS (C1) I498X

70

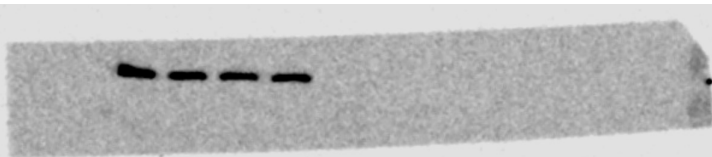

UBQLN2

100

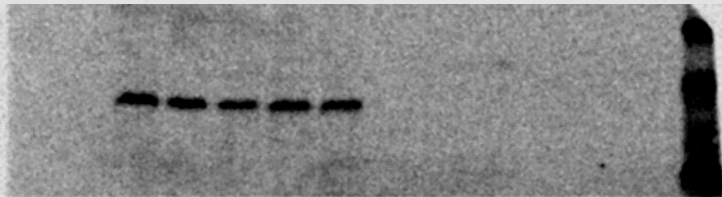

PSMD1

Supplement: fig6-data1 [file elife-84382-fig6-data1-v2.zip]

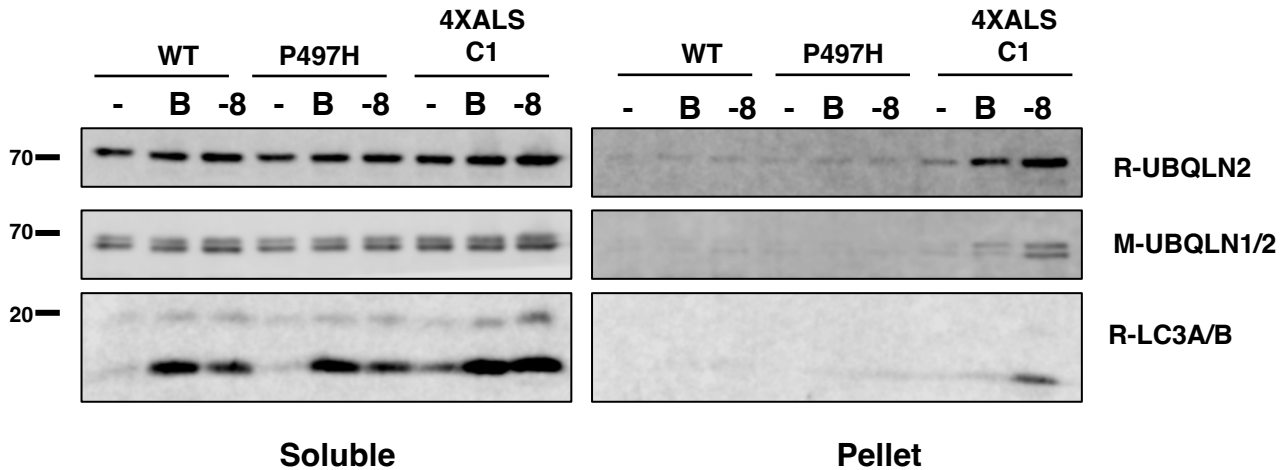

Supplement: fig6-data1 [file elife-84382-fig6-data1-v2.zip]

iPSC sol (TX-100)

iPSC pellet (TX-100)

WT P497H 2XALS 4XALS (C1) I498X

WT P497H 2XALS 4XALS (C1) I498X

70

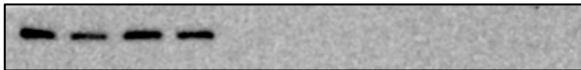

UBQLN2

100

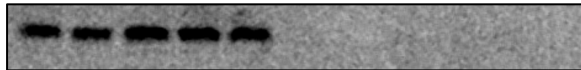

PSMD1

Supplement: fig6-data1 [file elife-84382-fig6-data1-v2.zip]

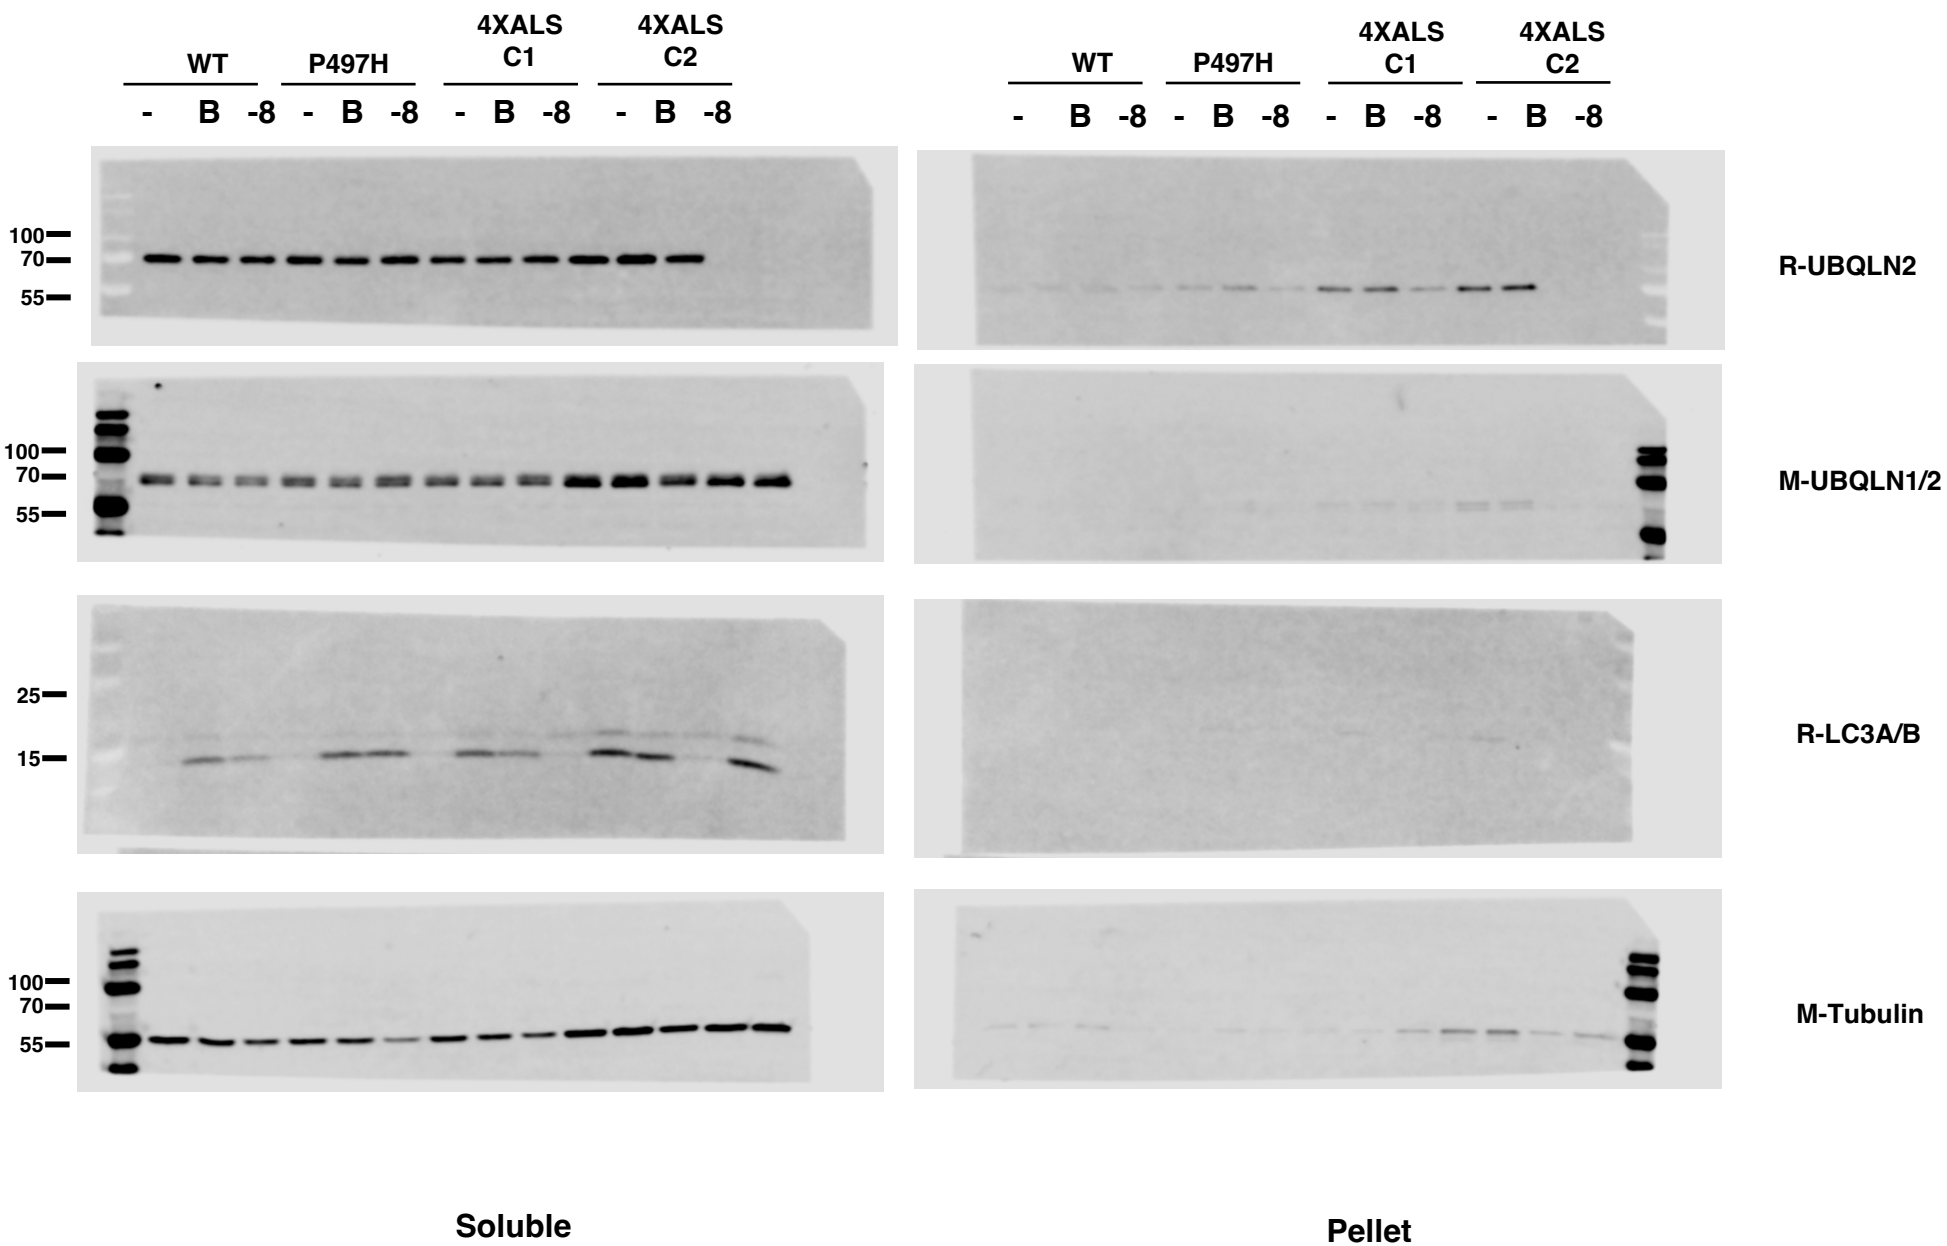

Supplement: fig6-data1 [file elife-84382-fig6-data1-v2.zip]
